# Supplementary material for: HydPred: a novel method for the identification of protein hydroxylation sites that reveals new insights into human inherited disease
Source: Royal Society of Chemistry journal article supplement (doi:10.1039/c5mb00681c), 2015-11-26
Supplement: c5mb00681c1.pdf [file c5mb00681c1.pdf]

Table S1. Hydroxylation datasets

| Hydroxyproline |      |                |       |          |
|----------------|------|----------------|-------|----------|
| Pro. ID        | Site | Frag.          | Class | Dataset  |
| ADIPO_BOVIN    | 39   | GWMAGIPGHPGHN  | 1     | training |
| ADIPO_BOVIN    | 42   | AGIPGHPGHNGTP  | 1     | training |
| ADIPO_BOVIN    | 48   | PGHNGTPGRDGRD  | 1     | training |
| ADIPO_BOVIN    | 86   | ITGIEGPRGFPGT  | 1     | training |
| ADIPO_BOVIN    | 14   | LLLLALPSHGEDN  | -1    | training |
| ADIPO_BOVIN    | 24   | EDNMEDPPLPKGA  | -1    | training |
| ADIPO_BOVIN    | 25   | DNMEDPPLPKGAC  | -1    | training |
| ADIPO_BOVIN    | 27   | MEDPPLPKGACAG  | -1    | training |
| ADIPO_BOVIN    | 57   | DGRDGTPEKGEK   | -1    | training |
| ADIPO_BOVIN    | 66   | KGEKGDPLVGP    | -1    | training |
| ADIPO_BOVIN    | 71   | DPGLVGPKGDTGE  | -1    | training |
| ADIPO_BOVIN    | 90   | EGPRGFPGTPGRK  | -1    | training |
| ADIPO_BOVIN    | 93   | RGFPGTPGRKGEP  | -1    | training |
| ADIPO_BOVIN    | 99   | PGRKGEPGESAYV  | -1    | training |
| ADIPO_BOVIN    | 121  | ERQVTVPNVPIRF  | -1    | training |
| ADIPO_BOVIN    | 124  | VTVPNVPIRFTKI  | -1    | training |
| ADIPO_BOVIN    | 150  | KFLCNIPGLYYFS  | -1    | training |
| ADIPO_HUMAN    | 47   | AGIPGHPGHNGAP  | 1     | training |
| ADIPO_HUMAN    | 53   | PGHNGAPGRDGRD  | 1     | training |
| ADIPO_HUMAN    | 71   | KGEKGDPLIGPK   | 1     | training |
| ADIPO_HUMAN    | 76   | DPGLIGPKGDIGE  | 1     | training |
| ADIPO_HUMAN    | 91   | VPGAEGPRGFPGI  | 1     | training |
| ADIPO_HUMAN    | 95   | EGPRGFPGIQGRK  | 1     | training |
| ADIPO_HUMAN    | 14   | LLLLALPGHDQET  | -1    | training |
| ADIPO_HUMAN    | 25   | ETTTQGPVLLPL   | -1    | training |
| ADIPO_HUMAN    | 30   | GPGVLLPLPKGAC  | -1    | training |
| ADIPO_HUMAN    | 32   | GVLLPLPKGACTG  | -1    | training |
| ADIPO_HUMAN    | 86   | IGETGVPGAEGPR  | -1    | training |
| ADIPO_HUMAN    | 104  | QGRKGEPGEGAYV  | -1    | training |
| ADIPO_HUMAN    | 126  | ETYVTIPNMPPIRF | -1    | training |
| ADIPO_HUMAN    | 129  | VTIPNMPPIRFTKI | -1    | training |
| ADIPO_HUMAN    | 155  | KFHCNIPGLYYFA  | -1    | training |
| ADRB2_HUMAN    | 382  | LLCEDLPGTEDFV  | 1     | training |
| ADRB2_HUMAN    | 395  | GHQGTVPSDNIDS  | 1     | training |
| ADRB2_HUMAN    | 4    | XXXMGQPGNGSAF  | -1    | training |
| ADRB2_HUMAN    | 14   | SAFLAPNGSHAP   | -1    | training |
| ADRB2_HUMAN    | 20   | PNGSHAPDHDVTQ  | -1    | training |
| ADRB2_HUMAN    | 88   | MGLAVVPFGAAHI  | -1    | training |
| ADRB2_HUMAN    | 138  | YFAITSPFKYQSL  | -1    | training |

|             |     |                |    |          |
|-------------|-----|----------------|----|----------|
| ADRB2_HUMAN | 168 | GLTSFLPIQMHWY  | -1 | training |
| ADRB2_HUMAN | 211 | IVSFYVPLVIMVF  | -1 | training |
| ADRB2_HUMAN | 288 | FTLCWLPPFFIVNI | -1 | training |
| ADRB2_HUMAN | 323 | VNSGFNPLIYCRS  | -1 | training |
| ADRB2_HUMAN | 330 | LIYCRSPDFRIAF  | -1 | training |
| AGO2_HUMAN  | 700 | LEKDYQPGITFIV  | 1  | training |
| AGO2_HUMAN  | 7   | MYSGAGPALAPPA  | -1 | training |
| AGO2_HUMAN  | 11  | AGPALAPPAPPPP  | -1 | training |
| AGO2_HUMAN  | 12  | GPALAPPAPPPPI  | -1 | training |
| AGO2_HUMAN  | 14  | ALAPPAPPPPIQG  | -1 | training |
| AGO2_HUMAN  | 15  | LAPPAPPPPIQGY  | -1 | training |
| AGO2_HUMAN  | 16  | APPAPPPPIQGYA  | -1 | training |
| AGO2_HUMAN  | 17  | PPAPPPPIQGYAF  | -1 | training |
| AGO2_HUMAN  | 25  | QGYAFKPPRPDF   | -1 | training |
| AGO2_HUMAN  | 26  | GYAFKPPRPDFG   | -1 | training |
| AGO2_HUMAN  | 27  | YAFKPPRPDFGT   | -1 | training |
| AGO2_HUMAN  | 29  | FKPPRPDFGTSG   | -1 | training |
| AGO2_HUMAN  | 50  | FFEMDIPKIDIYH  | -1 | training |
| AGO2_HUMAN  | 63  | YELDIKPEKCPRR  | -1 | training |
| AGO2_HUMAN  | 67  | IKPEKCPRRVNRE  | -1 | training |
| AGO2_HUMAN  | 92  | IFGDRKPVFDGRK  | -1 | training |
| AGO2_HUMAN  | 105 | NLYTAMPLPIGRD  | -1 | training |
| AGO2_HUMAN  | 107 | YTAMPLPIGRDKV  | -1 | training |
| AGO2_HUMAN  | 120 | ELEVTLPGEGKDR  | -1 | training |
| AGO2_HUMAN  | 152 | ALSGRLPSVPFET  | -1 | training |
| AGO2_HUMAN  | 155 | GRLPSVPFETIQA  | -1 | training |
| AGO2_HUMAN  | 170 | VVMRHLPSMRYTP  | -1 | training |
| AGO2_HUMAN  | 176 | PSMRYTPVGRSFF  | -1 | training |
| AGO2_HUMAN  | 191 | SEGCSNPLGGGRE  | -1 | training |
| AGO2_HUMAN  | 208 | FHQSVRPSLWKMM  | -1 | training |
| AGO2_HUMAN  | 229 | AFYKAQPVIEFVC  | -1 | training |
| AGO2_HUMAN  | 249 | IEEQKPLTDSQR   | -1 | training |
| AGO2_HUMAN  | 288 | CNVTRRPASHQTF  | -1 | training |
| AGO2_HUMAN  | 295 | ASHQTFPLQQESG  | -1 | training |
| AGO2_HUMAN  | 323 | KLVLRYPHLPCLQ  | -1 | training |
| AGO2_HUMAN  | 326 | LRYPHLPCLQVGQ  | -1 | training |
| AGO2_HUMAN  | 340 | QKHTYLPLEVCNI  | -1 | training |
| AGO2_HUMAN  | 373 | ATARSAPDRQEEI  | -1 | training |
| AGO2_HUMAN  | 392 | ASFNTDPYVREFG  | -1 | training |
| AGO2_HUMAN  | 415 | TGRVLQPPSILYG  | -1 | training |
| AGO2_HUMAN  | 416 | GRVLQPPSILYGG  | -1 | training |
| AGO2_HUMAN  | 430 | NKAIATPVQGVWD  | -1 | training |
| AGO2_HUMAN  | 458 | AIACFAPQRQCTE  | -1 | training |

|             |     |                |    |          |
|-------------|-----|----------------|----|----------|
| AGO2_HUMAN  | 484 | SRDAGMPIQGQPC  | -1 | training |
| AGO2_HUMAN  | 489 | MPIQGQPCFCKYA  | -1 | training |
| AGO2_HUMAN  | 503 | GADSVPEPMFRHLK | -1 | training |
| AGO2_HUMAN  | 523 | LVVVILPGKTPVY  | -1 | training |
| AGO2_HUMAN  | 527 | ILPGKTPVYAEVK  | -1 | training |
| AGO2_HUMAN  | 557 | NVQRTPQTLSNL   | -1 | training |
| AGO2_HUMAN  | 580 | VNNILLPQGRPPV  | -1 | training |
| AGO2_HUMAN  | 584 | LLPQGRPPVFQQP  | -1 | training |
| AGO2_HUMAN  | 585 | LPQGRPPVFQQPV  | -1 | training |
| AGO2_HUMAN  | 590 | PPVFQQPVIFLGA  | -1 | training |
| AGO2_HUMAN  | 601 | GADVTHPPAGDGK  | -1 | training |
| AGO2_HUMAN  | 602 | ADVTHPPAGDGKK  | -1 | training |
| AGO2_HUMAN  | 609 | AGDGKKPSIAAVV  | -1 | training |
| AGO2_HUMAN  | 622 | GSMDAHPNRYCAT  | -1 | training |
| AGO2_HUMAN  | 661 | KSTRFKPTRIIFY  | -1 | training |
| AGO2_HUMAN  | 731 | GKSGNIPAGTTVD  | -1 | training |
| AGO2_HUMAN  | 743 | DTKITHPTEFDY   | -1 | training |
| AGO2_HUMAN  | 762 | IQGTSRPSHYHVL  | -1 | training |
| AGO2_HUMAN  | 800 | TRSVSIPAPAYYA  | -1 | training |
| AGO2_HUMAN  | 802 | SVSIPAPAYY AHL | -1 | training |
| AGP10_ARATH | 24  | SAIAQAPGPAPTR  | 1  | training |
| AGP10_ARATH | 26  | IAQAPGPAPTRSP  | 1  | training |
| AGP10_ARATH | 28  | QAPGPAPTRSPLP  | 1  | training |
| AGP10_ARATH | 32  | PAPTRSPLPSPAQ  | 1  | training |
| AGP10_ARATH | 36  | RSPLPSPAQPPRT  | 1  | training |
| AGP10_ARATH | 34  | PTRSPLPSPAQPP  | -1 | training |
| AGP10_ARATH | 39  | LPSPAQPPRTAAP  | -1 | training |
| AGP10_ARATH | 40  | PSPAQPPRTAAPT  | -1 | training |
| AGP10_ARATH | 45  | PPRTAAPTSPITP  | -1 | training |
| AGP10_ARATH | 47  | RTAAPTSPITPTP  | -1 | training |
| AGP10_ARATH | 51  | PTPSITPTPTPTP  | -1 | training |
| AGP10_ARATH | 53  | PSITPTPTPTPSA  | -1 | training |
| AGP10_ARATH | 55  | ITPTPTPTPSATP  | -1 | training |
| AGP10_ARATH | 57  | PTPTPTPSATPTA  | -1 | training |
| AGP10_ARATH | 61  | PTPSATPTAAPVS  | -1 | training |
| AGP10_ARATH | 65  | ATPTAAPVSPPAG  | -1 | training |
| AGP10_ARATH | 68  | TAAPVSPPAGSPL  | -1 | training |
| AGP10_ARATH | 69  | AAPVSPPAGSPLP  | -1 | training |
| AGP10_ARATH | 73  | SPPAGSPLPSSAS  | -1 | training |
| AGP10_ARATH | 75  | PAGSPLPSSASPP  | -1 | training |
| AGP10_ARATH | 80  | LPSSASPPAPPTS  | -1 | training |
| AGP10_ARATH | 81  | PSSASPPAPPTSL  | -1 | training |
| AGP10_ARATH | 83  | SASPPAPPTSLTP  | -1 | training |

|             |     |                |    |          |
|-------------|-----|----------------|----|----------|
| AGP10_ARATH | 84  | ASPPAPPTSLTPD  | -1 | training |
| AGP10_ARATH | 89  | PPTSLTPDGAPVA  | -1 | training |
| AGP10_ARATH | 93  | LTPDGAPVAGPTG  | -1 | training |
| AGP10_ARATH | 97  | GAPVAGPTGSTPV  | -1 | training |
| AGP10_ARATH | 102 | GPTGSTPVDNNA   | -1 | training |
| AGP12_ARATH | 32  | AAQTEAPAPSPTS  | 1  | training |
| AGP12_ARATH | 34  | QTEAPAPSPTSDA  | 1  | training |
| AGP12_ARATH | 36  | EAPAPSPTSDAAM  | 1  | training |
| AGP12_ARATH | 45  | DAAMFVPALFASV  | -1 | training |
| AGP13_ARATH | 31  | AAAVEAPAPSPTS  | 1  | training |
| AGP13_ARATH | 33  | AVEAPAPSPTSDA  | 1  | training |
| AGP13_ARATH | 35  | EAPAPSPTSDASL  | 1  | training |
| AGP13_ARATH | 44  | DASLAIPAFFASV  | -1 | training |
| AGP14_ARATH | 32  | VAAVDAPAPSPTS  | 1  | training |
| AGP14_ARATH | 34  | AVDAPAPSPTSDA  | 1  | training |
| AGP14_ARATH | 36  | DAPAPSPTSDASS  | 1  | training |
| AGP14_ARATH | 45  | DASSFIPTFFASV  | -1 | training |
| AGP15_ARATH | 27  | SAQSEAPAPSPTS  | 1  | training |
| AGP15_ARATH | 29  | QSEAPAPSPTSGS  | 1  | training |
| AGP15_ARATH | 31  | EAPAPSPTSGSSA  | 1  | training |
| AGP16_ARATH | 31  | GAQSLAPAPAPTS  | 1  | training |
| AGP16_ARATH | 33  | QSLAPAPAPTS DG | 1  | training |
| AGP16_ARATH | 35  | LAPAPAPTS DGTS | 1  | training |
| AGP16_ARATH | 63  | LTYLIHPLDASSS  | -1 | training |
| AGP2_ARATH  | 24  | SCLAQAPAPAPTT  | 1  | training |
| AGP2_ARATH  | 26  | LAQAPAPAPTTVT  | 1  | training |
| AGP2_ARATH  | 28  | QAPAPAPTTVTPP  | 1  | training |
| AGP2_ARATH  | 34  | PTTVTPPPTALPP  | 1  | training |
| AGP2_ARATH  | 35  | TTVTPPPTALPPV  | 1  | training |
| AGP2_ARATH  | 33  | APTTVTPPPTALP  | -1 | training |
| AGP2_ARATH  | 39  | PPPTALPPVTAET  | -1 | training |
| AGP2_ARATH  | 40  | PPTALPPVTAETP  | -1 | training |
| AGP2_ARATH  | 46  | PVTAETPSPIASP  | -1 | training |
| AGP2_ARATH  | 48  | TAETPSPIASPPV  | -1 | training |
| AGP2_ARATH  | 52  | PSPIASPPVPVNE  | -1 | training |
| AGP2_ARATH  | 53  | SPIASPPVPVNEP  | -1 | training |
| AGP2_ARATH  | 55  | IASPPVPVNEPTP  | -1 | training |
| AGP2_ARATH  | 59  | PVPVNEPTPAPTT  | -1 | training |
| AGP2_ARATH  | 61  | PVNEPTPAPTTSP  | -1 | training |
| AGP2_ARATH  | 63  | NEPTPAPTTSPTT  | -1 | training |
| AGP2_ARATH  | 67  | PAPTTSPTTSPVA  | -1 | training |
| AGP2_ARATH  | 71  | TSPTTSPVASPPQ  | -1 | training |
| AGP2_ARATH  | 75  | TSPVASPPQTDAP  | -1 | training |

|            |     |                |    |          |
|------------|-----|----------------|----|----------|
| AGP2_ARATH | 76  | SPVASPPQTDAPA  | -1 | training |
| AGP2_ARATH | 81  | PPQTDAPAPGPSA  | -1 | training |
| AGP2_ARATH | 83  | QTDAPAPGPSAGL  | -1 | training |
| AGP2_ARATH | 85  | DAPAPGPSAGLTP  | -1 | training |
| AGP2_ARATH | 91  | PSAGLTPTSSPAP  | -1 | training |
| AGP2_ARATH | 95  | LTPTSSPAPGPDG  | -1 | training |
| AGP2_ARATH | 97  | PTSSPAPGPDGAA  | -1 | training |
| AGP2_ARATH | 99  | SSPAPGPDGAADA  | -1 | training |
| AGP2_ARATH | 106 | DGAADAPSAAWAN  | -1 | training |
| AGP7_ARATH | 24  | SCLAQAPAPSPTT  | 1  | training |
| AGP7_ARATH | 26  | LAQAPAPSPTTTV  | 1  | training |
| AGP7_ARATH | 28  | QAPAPSPTTTVTP  | 1  | training |
| AGP7_ARATH | 35  | TTTVTPPPVATPP  | 1  | training |
| AGP7_ARATH | 36  | TTVTTPPPVATPPP | 1  | training |
| AGP7_ARATH | 34  | PTTTVTTPPPVATP | -1 | training |
| AGP7_ARATH | 46  | PPPAATPAPTTP   | -1 | training |
| AGP7_ARATH | 48  | PAATPAPTTPPPP  | -1 | training |
| AGP7_ARATH | 52  | PAPTTPPPAVSP   | -1 | training |
| AGP7_ARATH | 53  | APTTTPPPAVSPA  | -1 | training |
| AGP7_ARATH | 54  | PTTTTPPPAVSPAP | -1 | training |
| AGP7_ARATH | 58  | PPPAVSPAPTSSP  | -1 | training |
| AGP7_ARATH | 60  | PAVSPAPTSSPPS  | -1 | training |
| AGP7_ARATH | 64  | PAPTSSPPSSAPS  | -1 | training |
| AGP7_ARATH | 65  | APTSSPPSSAPSP  | -1 | training |
| AGP7_ARATH | 69  | SPPSSAPSSSDA   | -1 | training |
| AGP7_ARATH | 71  | PSSAPSSSDAPT   | -1 | training |
| AGP7_ARATH | 76  | SPSSDAPTASPPA  | -1 | training |
| AGP7_ARATH | 80  | DAPTASPPAPEGP  | -1 | training |
| AGP7_ARATH | 81  | APTASPPAPEGPG  | -1 | training |
| AGP7_ARATH | 83  | TASPPAPEGPGVS  | -1 | training |
| AGP7_ARATH | 86  | PPAPEGPGVSPGE  | -1 | training |
| AGP7_ARATH | 90  | EGPGVSPGELAPT  | -1 | training |
| AGP7_ARATH | 95  | SPGELAPTPSDAS  | -1 | training |
| AGP7_ARATH | 97  | GELAPTPSDASAP  | -1 | training |
| AGP7_ARATH | 103 | PSDASAPPPNAAL  | -1 | training |
| AGP7_ARATH | 104 | SDASAPPPNAALT  | -1 | training |
| AGP7_ARATH | 105 | DASAPPPNAALTN  | -1 | training |
| AGP9_ARATH | 23  | GVTGQAPTSPTTA  | 1  | training |
| AGP9_ARATH | 26  | GQAPTSPTATPA   | 1  | training |
| AGP9_ARATH | 27  | QAPTSPTATPAP   | 1  | training |
| AGP9_ARATH | 31  | SPPTATPAPTPT   | 1  | training |
| AGP9_ARATH | 33  | PTATPAPTPTTP   | 1  | training |
| AGP9_ARATH | 34  | TATPAPTPTTPP   | -1 | training |

|            |     |               |    |          |
|------------|-----|---------------|----|----------|
| AGP9_ARATH | 36  | TPAPPTPTTPPPA | -1 | training |
| AGP9_ARATH | 39  | PPTPTTPPPAATP | -1 | training |
| AGP9_ARATH | 40  | PTPTTPPPAATPP | -1 | training |
| AGP9_ARATH | 41  | TPTTPPPAATPPP | -1 | training |
| AGP9_ARATH | 45  | PPPAATPPPVSAP | -1 | training |
| AGP9_ARATH | 46  | PPAATPPPVSAPP | -1 | training |
| AGP9_ARATH | 47  | PAATPPPVSAPPP | -1 | training |
| AGP9_ARATH | 51  | PPPVSAPPPVTTS | -1 | training |
| AGP9_ARATH | 52  | PPVSAPPPVTTS  | -1 | training |
| AGP9_ARATH | 53  | PVSAPPPVTTSPP | -1 | training |
| AGP9_ARATH | 58  | PPVTTSPPPVTTA | -1 | training |
| AGP9_ARATH | 59  | PVTTSPPPVTTAP | -1 | training |
| AGP9_ARATH | 60  | VTTSPPPVTTAPP | -1 | training |
| AGP9_ARATH | 65  | PPVTTAPPPANPP | -1 | training |
| AGP9_ARATH | 66  | PVTTAPPPANPPP | -1 | training |
| AGP9_ARATH | 67  | VTTAPPPANPPPP | -1 | training |
| AGP9_ARATH | 70  | APPPANPPPPVSS | -1 | training |
| AGP9_ARATH | 71  | PPPANPPPPVSSP | -1 | training |
| AGP9_ARATH | 72  | PPANPPPPVSSPP | -1 | training |
| AGP9_ARATH | 73  | PANPPPPVSSPPP | -1 | training |
| AGP9_ARATH | 77  | PPPVSPPPASPP  | -1 | training |
| AGP9_ARATH | 78  | PPVSSPPPASPPP | -1 | training |
| AGP9_ARATH | 79  | PVSSPPPASPPPA | -1 | training |
| AGP9_ARATH | 82  | SPPPASPPPATPP | -1 | training |
| AGP9_ARATH | 83  | PPPASPPPATPPP | -1 | training |
| AGP9_ARATH | 84  | PPASPPPATPPPV | -1 | training |
| AGP9_ARATH | 87  | SPPPATPPPVASP | -1 | training |
| AGP9_ARATH | 88  | PPPATPPPVASPP | -1 | training |
| AGP9_ARATH | 89  | PPATPPPVASPPP | -1 | training |
| AGP9_ARATH | 93  | PPPVASPPPPVAS | -1 | training |
| AGP9_ARATH | 94  | PPVASPPPPVASP | -1 | training |
| AGP9_ARATH | 95  | PVASPPPPVASPP | -1 | training |
| AGP9_ARATH | 96  | VASPPPPVASPPP | -1 | training |
| AGP9_ARATH | 100 | PPPVASPPPATPP | -1 | training |
| AGP9_ARATH | 101 | PPVASPPPATPPP | -1 | training |
| AGP9_ARATH | 102 | PVASPPPATPPPV | -1 | training |
| AGP9_ARATH | 105 | SPPPATPPPVATP | -1 | training |
| AGP9_ARATH | 111 | PPPVATPPPAPLA | -1 | training |
| AGP9_ARATH | 112 | PPVATPPPAPLAS | -1 | training |
| AGP9_ARATH | 113 | PVATPPPAPLASP | -1 | training |
| AGP9_ARATH | 115 | ATPPPAPLASPPA | -1 | training |
| AGP9_ARATH | 119 | PAPLASPPAQVPA | -1 | training |
| AGP9_ARATH | 120 | APLASPPAQVPAP | -1 | training |

|                           |     |               |    |          |
|---------------------------|-----|---------------|----|----------|
| AGP9_ARATH                | 124 | SPPAQVPAPAPTT | -1 | training |
| AGP9_ARATH                | 126 | PAQVPAPAPTTKP | -1 | training |
| AGP9_ARATH                | 128 | QVPAPAPTTKPDS | -1 | training |
| AGP9_ARATH                | 132 | PAPTTKPDSPPS  | -1 | training |
| AGP9_ARATH                | 135 | TTKPDSPPSPSS  | -1 | training |
| AGP9_ARATH                | 137 | KPDSPPSPSSSP  | -1 | training |
| AGP9_ARATH                | 139 | DSPSPSPSSPPL  | -1 | training |
| AGP9_ARATH                | 143 | PSPSSPPLPSSD  | -1 | training |
| AGP9_ARATH                | 144 | SPSSPPLPSSDA  | -1 | training |
| AGP9_ARATH                | 146 | SSSPPLPSSDAPG | -1 | training |
| AGP9_ARATH                | 151 | LPSSDAPGPSTDS | -1 | training |
| AGP9_ARATH                | 153 | SSDAPGPSTDSIS | -1 | training |
| AGP9_ARATH                | 160 | STDSISPAPSPTD | -1 | training |
| AGP9_ARATH                | 162 | DSISPAPSPTDVN | -1 | training |
| AGP9_ARATH                | 164 | ISPAPSPTDVNDQ | -1 | training |
| AGPE_WHEAT                | 5   | XXYAEVPSAAQA  | 1  | training |
| AGPE_WHEAT                | 7   | YAEVPSAAQAPT  | 1  | training |
| AGPE_WHEAT                | 12  | SPAAQAPTADXXX | 1  | training |
| AMATX_AMAPH               | 8   | WGIGCNPXXXXXX | 1  | training |
| BRK_VESMA                 | 4   | XXXGRPPGFSPFR | 1  | training |
| BRK_VESMA                 | 3   | XXXXGRPPGFSPF | -1 | training |
| BRK_VESMA                 | 8   | RPPGFSPFRIDXX | -1 | training |
| BRK1_PHYHY;BRK4_P<br>HYAZ | 2   | XXXXXRPPGFSPF | -1 | training |
| BRK1_PHYHY;BRK4_P<br>HYAZ | 7   | RPPGFSPFRXXXX | -1 | training |
| BRK1_PHYSA                | 54  | EAPERPPGFTPFR | 1  | training |
| BRK1_PHYSA                | 50  | EKKREAPERPPGF | -1 | training |
| BRK1_PHYSA                | 53  | REAPERPPGFTPF | -1 | training |
| BRK1_PHYSA                | 58  | RPPGFTPFRYXX  | -1 | training |
| BRK2_PHYAZ                | 52  | KRFEPVPPGFTPF | 1  | training |
| BRK2_PHYAZ                | 50  | EKKRFEPVPPGFT | -1 | training |
| BRK2_PHYAZ                | 53  | RFEPVPPGFTPFR | -1 | training |
| BRK2_PHYAZ                | 57  | VPPGFTPFRQTXX | -1 | training |
| BRK3_PHYAZ;BRK8_P<br>HYHY | 2   | XXXXXVPPGFTPF | 1  | training |
| BRK3_PHYAZ;BRK8_P<br>HYHY | 3   | XXXXVPPGFTPFR | -1 | training |
| BRK3_PHYAZ;BRK8_P<br>HYHY | 7   | VPPGFTPFRQSXX | -1 | training |
| BRK4_PHYAZ;BRK1_P<br>HYHY | 3   | XXXXRPPGFSPFR | 1  | training |
| BRK4_PHYHY                | 7   | VPPGFTPFRXXXX | -1 | training |

|             |     |               |    |          |
|-------------|-----|---------------|----|----------|
| BRK5_PHYHY  | 3   | XXXXRPPGFTPFR | 1  | training |
| BRK5_PHYHY  | 2   | XXXXXRPPGFTPF | -1 | training |
| BRK5_PHYHY  | 7   | RPPGFTPFRXXXX | -1 | training |
| BRK6_PHYHY  | 7   | VPPGFTPFRQXXX | -1 | training |
| BRK7_PHYHY  | 7   | VPPGFTPFRVDXX | -1 | training |
| BRKP1_PHYHY | 54  | ESDRPPGFSPFR  | 1  | training |
| BRKP1_PHYHY | 50  | EKKRESPDRPPGF | -1 | training |
| BRKP1_PHYHY | 53  | RESPDRPPGFSPF | -1 | training |
| BRKP1_PHYHY | 58  | RPPGFSPFRIYXX | -1 | training |
| C1QB_HUMAN  | 35  | LSCTGPPAIPGIP | 1  | training |
| C1QB_HUMAN  | 38  | TGPPAIPGIPGIP | 1  | training |
| C1QB_HUMAN  | 41  | PAIPGIPGIPGTP | 1  | training |
| C1QB_HUMAN  | 53  | PGPDGQPGTPGIK | 1  | training |
| C1QB_HUMAN  | 56  | DGQPGTPGIKGEK | 1  | training |
| C1QB_HUMAN  | 65  | KGEKGLPGLAGDH | 1  | training |
| C1QB_HUMAN  | 83  | KGDPGIPGNPGKV | 1  | training |
| C1QB_HUMAN  | 86  | PGIPGNPGKVGPK | 1  | training |
| C1QB_HUMAN  | 101 | MGPKGGPGAPGAP | 1  | training |
| C1QB_HUMAN  | 104 | KGGPGAPGAPGPK | 1  | training |
| C1QB_HUMAN  | 107 | PGAPGAPGPKGES | 1  | training |
| C1QB_HUMAN  | 6   | XMMMkipwgsipv | -1 | training |
| C1QB_HUMAN  | 11  | IPWGSIPVLMLLL | -1 | training |
| C1QB_HUMAN  | 34  | QLSCTGPPAIPGI | -1 | training |
| C1QB_HUMAN  | 44  | PGIPGIPGTPGPD | -1 | training |
| C1QB_HUMAN  | 47  | PGIPGTPGPDGQP | -1 | training |
| C1QB_HUMAN  | 49  | IPGTPGPDGQPGT | -1 | training |
| C1QB_HUMAN  | 80  | FGEKGDPIGPNP  | -1 | training |
| C1QB_HUMAN  | 91  | NPGKVGPKGPMGP | -1 | training |
| C1QB_HUMAN  | 94  | KVGPKGPMGPKGG | -1 | training |
| C1QB_HUMAN  | 97  | PKGPMGPKGGPGA | -1 | training |
| C1QB_HUMAN  | 109 | APGAPGPKGESGD | -1 | training |
| C1QB_HUMAN  | 133 | TRTINVPLRRDQT | -1 | training |
| C1QB_HUMAN  | 155 | MNNNYEPRSGKFT | -1 | training |
| C1QB_HUMAN  | 165 | KFTCKVPGLYYFT | -1 | training |
| C1QB_HUMAN  | 249 | SGFLLFPDMEAXX | -1 | training |
| C1QC_HUMAN  | 36  | TGCYGIPGMPGLP | 1  | training |
| C1QC_HUMAN  | 39  | YGIPGMPGLPGAP | 1  | training |
| C1QC_HUMAN  | 42  | PGMPGLPGAPGKD | 1  | training |
| C1QC_HUMAN  | 45  | PGLPGAPGKDGYP | 1  | training |
| C1QC_HUMAN  | 54  | DGYDGLPGPKGEP | 1  | training |
| C1QC_HUMAN  | 63  | KGEPGIPAIPGIR | 1  | training |
| C1QC_HUMAN  | 81  | KGEPGLPGHPGKN | 1  | training |
| C1QC_HUMAN  | 93  | NGPMGPPGMPGVP | 1  | training |



|             |     |               |    |          |
|-------------|-----|---------------|----|----------|
| C1QC_HUMAN  | 96  | MGPPGMPGVPGPM | 1  | training |
| C1QC_HUMAN  | 99  | PGMPGVPGPMGIP | 1  | training |
| C1QC_HUMAN  | 105 | PGPMGIPGEPGEE | 1  | training |
| C1QC_HUMAN  | 5   | XXMDVGPSSLPHL | -1 | training |
| C1QC_HUMAN  | 9   | VGPSSLPHLGLKL | -1 | training |
| C1QC_HUMAN  | 23  | LLLLLLPLRGQAN | -1 | training |
| C1QC_HUMAN  | 56  | YDGLPGPKGEPGI | -1 | training |
| C1QC_HUMAN  | 60  | PGPKGEPGIPAIP | -1 | training |
| C1QC_HUMAN  | 66  | PGIPAIPGIRGPK | -1 | training |
| C1QC_HUMAN  | 71  | IPGIRGPKGQKGE | -1 | training |
| C1QC_HUMAN  | 78  | KGQKGEPGLPGHP | -1 | training |
| C1QC_HUMAN  | 84  | PGLPGHPGKNGPM | -1 | training |
| C1QC_HUMAN  | 89  | HPGKNGPMGPPGM | -1 | training |
| C1QC_HUMAN  | 92  | KNGPMGPPGMPGV | -1 | training |
| C1QC_HUMAN  | 101 | MPGVPGPMGIPGE | -1 | training |
| C1QC_HUMAN  | 108 | MGIPGEPGEEGRY | -1 | training |
| C1QC_HUMAN  | 131 | TRQTHQPPAPNSL | -1 | training |
| C1QC_HUMAN  | 132 | RQTHQPPAPNSLI | -1 | training |
| C1QC_HUMAN  | 134 | THQPPAPNSLIRF | -1 | training |
| C1QC_HUMAN  | 147 | NAVLTNPQGDYDT | -1 | training |
| C1QC_HUMAN  | 163 | KFTCKVPGLYYFV | -1 | training |
| C1QC_HUMAN  | 244 | SGFLLFPDXXXXX | -1 | training |
| C1QT9_MOUSE | 31  | QGHSGIPGNPGHN | 1  | training |
| C1QT9_MOUSE | 34  | SGIPGNPGHNGLP | 1  | training |
| C1QT9_MOUSE | 40  | PGHNGLPGRDGRD | 1  | training |
| C1QT9_MOUSE | 58  | KGDAGEPGHPGGP | 1  | training |
| C1QT9_MOUSE | 61  | AGEPGHPGGPGKD | 1  | training |
| C1QT9_MOUSE | 64  | PGHPGGPGKDGIR | 1  | training |
| C1QT9_MOUSE | 76  | RGEKGEPGADGRV | 1  | training |
| C1QT9_MOUSE | 115 | TGEQGLPGETGPQ | 1  | training |
| C1QT9_MOUSE | 151 | LGPKGLPGPMGPI | 1  | training |
| C1QT9_MOUSE | 160 | MGPICKPGPRGEA | 1  | training |
| C1QT9_MOUSE | 175 | MGPQGEVVRGMR  | 1  | training |
| C1QT9_MOUSE | 91  | KGIKGDPSRGSP  | -1 | training |
| C1QT9_MOUSE | 97  | PGSRGSPGKHGPK | -1 | training |
| C1QT9_MOUSE | 102 | SPGKHGPKGSIGP | -1 | training |
| C1QT9_MOUSE | 108 | PKGSIGPTGEQGL | -1 | training |
| C1QT9_MOUSE | 120 | LPGETGPQGQKGD | -1 | training |
| C1QT9_MOUSE | 132 | DKGEVGTGPEGL  | -1 | training |
| C1QT9_MOUSE | 135 | EVGPTGPEGLMGS | -1 | training |
| C1QT9_MOUSE | 144 | LMGSTGPLGPKGL | -1 | training |
| C1QT9_MOUSE | 147 | STGPLGPKGLPGP | -1 | training |
| C1QT9_MOUSE | 153 | PKGLPGPMPIGK  | -1 | training |

|             |     |               |    |          |
|-------------|-----|---------------|----|----------|
| C1QT9_MOUSE | 156 | LPGPMGPIGKPGP | -1 | training |
| C1QT9_MOUSE | 162 | PIGKPGPRGEAGP | -1 | training |
| C1QT9_MOUSE | 168 | PRGEAGPMGPQGE | -1 | training |
| C1QT9_MOUSE | 171 | EAGPMGPQGEPGV | -1 | training |
| C1QT9_MOUSE | 197 | GKVGAEPLVPKSA | -1 | training |
| C1QT9_MOUSE | 200 | GEAPLVPKSAFTV | -1 | training |
| C1QT9_MOUSE | 215 | TVISKFPPDAPI  | -1 | training |
| C1QT9_MOUSE | 216 | VISKFPPDAPIK  | -1 | training |
| C1QT9_MOUSE | 217 | ISKFPPDAPIKF  | -1 | training |
| C1QT9_MOUSE | 220 | FPPDAPIKFDKI  | -1 | training |
| C6A_CONQU   | 5   | XXDQSCPWCGFTC | 1  | training |
| C6A_CONQU   | 14  | GFTCCLPNYCQGL | -1 | training |
| C7A_CONTU   | 10  | GRDSRCPPVCCMG | 1  | training |
| C7A_CONTU   | 11  | RDSRCPPVCCMGL | 1  | training |
| C9A_GEMSP   | 3   | XXXXIDPPRYCNH | 1  | training |
| C9A_GEMSP   | 4   | XXXIDPPRYCNHI | 1  | training |
| C9B_GEMSP   | 3   | XXXXGDPPRFCRD | 1  | training |
| C9B_GEMSP   | 4   | XXXGDPPRFCRDK | 1  | training |
| CA1_CONER   | 46  | LTARRDPCCYHPT | 1  | training |
| CA1_CONER   | 51  | DPCCYHPTCNMSN | -1 | training |
| CA1_CONER   | 58  | TCNMSNPQICGXX | -1 | training |
| CA1A_CONCN  | 54  | NGRCCHPACGKYY | 1  | training |
| CA1A_CONCN  | 23  | TTVVSFSPDSASD | -1 | training |
| CA1A_CONVC  | 55  | RGCCSDPRCNYDH | 1  | training |
| CA1A_CONVC  | 62  | RCNYDHPEICGXX | -1 | training |
| CA1AB_CONSP | 55  | RTCCSRPTCRMAY | 1  | training |
| CA1AB_CONSP | 62  | TCRMEYPELCGGR | -1 | training |
| CA1B_CONPU  | 3   | XXXXQSPGCCWNP | 1  | training |
| CA1B_CONPU  | 9   | PGCCWNPACVKNR | -1 | training |
| CA1F_CONRE  | 7   | DYCCRRPPCTLIC | 1  | training |
| CA1F_CONRE  | 8   | YCCRRPPCTLICX | 1  | training |
| CA4A_CONER  | 7   | GCCGPYPNAACHP | 1  | training |
| CA4A_CONER  | 13  | PNAACHPCGCKVG | 1  | training |
| CA4A_CONER  | 21  | GCKVGRPPYCDRP | 1  | training |
| CA4A_CONER  | 22  | CKVGRPPYCDRPS | 1  | training |
| CA4A_CONER  | 27  | PPYCDRPSGGXXX | 1  | training |
| CA4A_CONER  | 5   | XXGCCGPYPNAAC | -1 | training |
| CA4A_CONMA  | 40  | VVHERAPELVVTA | 1  | training |
| CA4A_CONMA  | 55  | NCCGYNPMTICPP | 1  | training |
| CA4A_CONMA  | 60  | NPMTICPPCMCTY | 1  | training |
| CA4A_CONMA  | 61  | PMTICPPCMCTYS | 1  | training |
| CA4A_CONMA  | 69  | MCTYSCPPKRKPG | 1  | training |
| CA4A_CONMA  | 70  | CTYSCPPKRKPGR | 1  | training |

|            |     |                |    |          |
|------------|-----|----------------|----|----------|
| CA4A_CONMA | 74  | CPPKRKPGRRNDX  | 1  | training |
| CA4A_CONMA | 23  | TTVVSI PSDRASD | -1 | training |
| CA4A_CONOB | 5   | XXCCGVPNAACHP  | 1  | training |
| CA4A_CONOB | 11  | PNAACHPCVCKNT  | 1  | training |
| CA4A_CONPU | 7   | GCCGSYPNAACHP  | 1  | training |
| CA4A_CONPU | 13  | PNAACHPCSKDR   | 1  | training |
| CA4A_CONPU | 20  | CCKDRPSYCGQX   | 1  | training |
| CA4B_CONER | 7   | GCCGKYPNAACHP  | 1  | training |
| CA4B_CONER | 13  | PNAACHPCGCTVG  | 1  | training |
| CA4B_CONER | 21  | GCTVGRPPYCDRP  | 1  | training |
| CA4B_CONER | 22  | CTVGRPPYCDRPS  | 1  | training |
| CA4B_CONOB | 5   | XXCCGVPNAACPP  | 1  | training |
| CA4B_CONOB | 11  | PNAACPPVCNK    | 1  | training |
| CA4B_CONOB | 10  | VPNAACPPVCNK   | -1 | training |
| CAFF_RIFPA | 21  | IGPRGPPGPPGSP  | 1  | training |
| CAFF_RIFPA | 24  | RGPPGPPGSPGQQ  | 1  | training |
| CAFF_RIFPA | 27  | PGPPGSPGQQGYQ  | 1  | training |
| CAFF_RIFPA | 39  | QGLRGEPGDSGPM  | 1  | training |
| CAFF_RIFPA | 53  | PIGKRGPYPGAGI  | 1  | training |
| CAFF_RIFPA | 54  | IGKRGPYPGAGIA  | 1  | training |
| CAFF_RIFPA | 72  | DGRDGEPGPRGGI  | 1  | training |
| CAFF_RIFPA | 90  | RGAGGMPGMPGPK  | 1  | training |
| CAFF_RIFPA | 93  | GGMPGMPGPKGHR  | 1  | training |
| CAFF_RIFPA | 123 | QGPDGGPPGAGPS  | 1  | training |
| CAFF_RIFPA | 128 | GPGPAGPSGPIGP  | 1  | training |
| CAFF_RIFPA | 150 | DGKSGLPGLRGVD  | 1  | training |
| CAFF_RIFPA | 161 | VDGLAGPPGPPGP  | 1  | training |
| CAFF_RIFPA | 162 | DGLAGPPGPPGPI  | 1  | training |
| CAFF_RIFPA | 164 | LAGPPGPPGPIGS  | 1  | training |
| CAFF_RIFPA | 165 | AGPPGPPGPIGST  | 1  | training |
| CAFF_RIFPA | 174 | IGSTGSPGFPGTP  | 1  | training |
| CAFF_RIFPA | 177 | TGSPGFPGTPGSK  | 1  | training |
| CAFF_RIFPA | 180 | PGFPGTPGSKGDR  | 1  | training |
| CAFF_RIFPA | 207 | VGLSGQPGVAGEN  | 1  | training |
| CAFF_RIFPA | 216 | AGENGHPGMPGMD  | 1  | training |
| CAFF_RIFPA | 219 | NGHPGMPGMDGAN  | 1  | training |
| CAFF_RIFPA | 228 | DGANGEPGASGES  | 1  | training |
| CAFF_RIFPA | 237 | SGESGLPGPSGFP  | 1  | training |
| CAFF_RIFPA | 243 | PGPSGFPGPRGMP  | 1  | training |
| CAFF_RIFPA | 249 | PGPRGMPGTAGSP  | 1  | training |
| CAFF_RIFPA | 255 | PGTAGSPGQAGAK  | 1  | training |
| CAFF_RIFPA | 273 | TGEQGRPGAPGVK  | 1  | training |
| CAFF_RIFPA | 276 | QGRPGAPGVKGSS  | 1  | training |

|            |     |                |   |          |
|------------|-----|----------------|---|----------|
| CAFF_RIFPA | 285 | KGSSGPPGDVGGAP | 1 | training |
| CAFF_RIFPA | 291 | PGDVGAPGHAGEA  | 1 | training |
| CAFF_RIFPA | 303 | AGKRGSPGSPGPA  | 1 | training |
| CAFF_RIFPA | 306 | RGSPGSPGPAGSP  | 1 | training |
| CAFF_RIFPA | 312 | PGPAGSPGPQGDR  | 1 | training |
| CAFF_RIFPA | 321 | QGDRGLPGSRGLP  | 1 | training |
| CAFF_RIFPA | 327 | PGSRGLPGMTGAS  | 1 | training |
| CAFF_RIFPA | 339 | SGAMGIPGEKGPS  | 1 | training |
| CAFF_RIFPA | 348 | KGPSGEPGAKGPT  | 1 | training |
| CAFF_RIFPA | 366 | QGNQGTPIAGLP   | 1 | training |
| CAFF_RIFPA | 372 | PGIAGLPGNPGSD  | 1 | training |
| CAFF_RIFPA | 375 | AGLPGNPGSDGRP  | 1 | training |
| CAFF_RIFPA | 381 | PGSDGRPGKDGRP  | 1 | training |
| CAFF_RIFPA | 387 | PGKDGRPGIRGKD  | 1 | training |
| CAFF_RIFPA | 416 | LQGRAGPPGARGE  | 1 | training |
| CAFF_RIFPA | 417 | QGRAGPPGARGEP  | 1 | training |
| CAFF_RIFPA | 423 | PGARGEPGKNGAP  | 1 | training |
| CAFF_RIFPA | 429 | PGKNGAPGEPGAH  | 1 | training |
| CAFF_RIFPA | 432 | NGAPGEPGAHGEQ  | 1 | training |
| CAFF_RIFPA | 453 | TGAAGPPGAAGPT  | 1 | training |
| CAFF_RIFPA | 465 | TGARGPPGPRGQQ  | 1 | training |
| CAFF_RIFPA | 483 | AGAQTGPEAGKT   | 1 | training |
| CAFF_RIFPA | 500 | AVGATGPSGPAGP  | 1 | training |
| CAFF_RIFPA | 503 | ATGPSGPAGPGGE  | 1 | training |
| CAFF_RIFPA | 506 | PSGPAGPGGERGA  | 1 | training |
| CAFF_RIFPA | 513 | GGERGAPGDRGNV  | 1 | training |
| CAFF_RIFPA | 525 | VGPRGMPGERGAT  | 1 | training |
| CAFF_RIFPA | 533 | ERGATGPAGPTGS  | 1 | training |
| CAFF_RIFPA | 536 | ATGPAGPTGSPGV  | 1 | training |
| CAFF_RIFPA | 540 | AGPTGSPGVAGAK  | 1 | training |
| CAFF_RIFPA | 551 | AKGQGGPPGPAGL  | 1 | training |
| CAFF_RIFPA | 552 | KGQGGPPGPAGLV  | 1 | training |
| CAFF_RIFPA | 561 | AGLVGLPGERGPK  | 1 | training |
| CAFF_RIFPA | 603 | RGENGLPGPSGLA  | 1 | training |
| CAFF_RIFPA | 621 | RGDMGSPGERGSP  | 1 | training |
| CAFF_RIFPA | 627 | PGERGSPGPAGER  | 1 | training |
| CAFF_RIFPA | 645 | QGIQQQPGPPGDA  | 1 | training |
| CAFF_RIFPA | 647 | IQQQPGPPGDAGP  | 1 | training |
| CAFF_RIFPA | 648 | QQQPGPPGDAGPA  | 1 | training |
| CAFF_RIFPA | 663 | KGDIGFPGERGTR  | 1 | training |
| CAFF_RIFPA | 708 | QGEIGLPGSPGQP  | 1 | training |
| CAFF_RIFPA | 711 | IGLPGSPGQPGLP  | 1 | training |
| CAFF_RIFPA | 714 | PGSPGQPGLPGPS  | 1 | training |

|            |      |               |    |          |
|------------|------|---------------|----|----------|
| CAFF_RIFPA | 717  | PGQPGLPGPSGQP | 1  | training |
| CAFF_RIFPA | 723  | PGPSGQPGPSGPA | 1  | training |
| CAFF_RIFPA | 744  | KGARGSPGLVGKQ | 1  | training |
| CAFF_RIFPA | 759  | RGSDGEPGRDGTK | 1  | training |
| CAFF_RIFPA | 773  | ERGEDGPPGVSGP | 1  | training |
| CAFF_RIFPA | 774  | RGEDGPPGVSGPT | 1  | training |
| CAFF_RIFPA | 783  | SGPTGAPGQQGER | 1  | training |
| CAFF_RIFPA | 792  | QGERGMPGMVGLR | 1  | training |
| CAFF_RIFPA | 815  | MKGDGGPPGPSGD | 1  | training |
| CAFF_RIFPA | 816  | KGDGGPPGPSGDR | 1  | training |
| CAFF_RIFPA | 843  | SGQAGAPGQEGAP | 1  | training |
| CAFF_RIFPA | 849  | PGQEGAPGKDGLP | 1  | training |
| CAFF_RIFPA | 855  | PGKDGLPGLAGRP | 1  | training |
| CAFF_RIFPA | 861  | PGLAGRPGERGEP | 1  | training |
| CAFF_RIFPA | 867  | PGERGEPGVAGRA | 1  | training |
| CAFF_RIFPA | 888  | MGQRGLPGAAGPP | 1  | training |
| CAFF_RIFPA | 894  | PGAAGPPGDRGER | 1  | training |
| CAFF_RIFPA | 903  | RGERGEPGGQGVQ | 1  | training |
| CAFF_RIFPA | 915  | QGPVGAPGSQGPA | 1  | training |
| CAFF_RIFPA | 945  | KGWTGLPGLQGLQ | 1  | training |
| CAFF_RIFPA | 954  | QGLQGTPGHSGES | 1  | training |
| CAFF_RIFPA | 963  | SGESGPPGAPGPR | 1  | training |
| CAFF_RIFPA | 966  | SGPPGAPGPRGAR | 1  | training |
| CAFF_RIFPA | 984  | RGSQGPPGKDGQP | 1  | training |
| CAFF_RIFPA | 990  | PGKDGQPGPSGRV | 1  | training |
| CAFF_RIFPA | 1010 | DDGRSGPPGPPGP | 1  | training |
| CAFF_RIFPA | 1011 | DGRSGPPGPPGPP | 1  | training |
| CAFF_RIFPA | 1013 | RSGPPGPPGPPGP | 1  | training |
| CAFF_RIFPA | 1014 | SGPPGPPGPPGPP | 1  | training |
| CAFF_RIFPA | 1016 | PPGPPGPPGPPGN | 1  | training |
| CAFF_RIFPA | 1017 | PGPPGPPGPPGNS | 1  | training |
| CAFF_RIFPA | 1019 | PPGPPGPPGNSDY | 1  | training |
| CAFF_RIFPA | 1020 | PGPPGPPGNSDYG | 1  | training |
| CAFF_RIFPA | 5    | XXYRAGPRYIQAQ | -1 | training |
| CAFF_RIFPA | 14   | IQAQVGPIGPRGP | -1 | training |
| CAFF_RIFPA | 17   | QVGPIGPRGPPGP | -1 | training |
| CAFF_RIFPA | 20   | PIGPRGPPGPPGS | -1 | training |
| CAFF_RIFPA | 23   | PRGPPGPPGSPGQ | -1 | training |
| CAFF_RIFPA | 44   | EPGDSGPMGPIGK | -1 | training |
| CAFF_RIFPA | 47   | DSGPMGPIGKRGP | -1 | training |
| CAFF_RIFPA | 56   | KRGPPGPAIAGK  | -1 | training |
| CAFF_RIFPA | 74   | RDGEPGPRGGIGP | -1 | training |
| CAFF_RIFPA | 80   | PRGGIGPMGPRGA | -1 | training |

|            |     |                |    |          |
|------------|-----|----------------|----|----------|
| CAFF_RIFPA | 83  | GIGPMGPRGAGGM  | -1 | training |
| CAFF_RIFPA | 95  | MPGMPGPKGHRGF  | -1 | training |
| CAFF_RIFPA | 119 | KSGNQGPDGGPGP  | -1 | training |
| CAFF_RIFPA | 125 | PDGGPGPAGPSGP  | -1 | training |
| CAFF_RIFPA | 131 | PAGPSGPIGPRGQ  | -1 | training |
| CAFF_RIFPA | 134 | PSGPIGPRGQTGE  | -1 | training |
| CAFF_RIFPA | 167 | PPGPPGPIGSTGS  | -1 | training |
| CAFF_RIFPA | 200 | AQGLQGPVGLSGQ  | -1 | training |
| CAFF_RIFPA | 239 | ESGLPGPSGFPGP  | -1 | training |
| CAFF_RIFPA | 245 | PSGFPGPRGMPGT  | -1 | training |
| CAFF_RIFPA | 266 | AKGDGGPTGEQGR  | -1 | training |
| CAFF_RIFPA | 284 | VKGSSGPPGDVGA  | -1 | training |
| CAFF_RIFPA | 308 | SPGSPGPAGSPGP  | -1 | training |
| CAFF_RIFPA | 314 | PAGSPGPQGDRGL  | -1 | training |
| CAFF_RIFPA | 344 | IPGEKGPSGEPGA  | -1 | training |
| CAFF_RIFPA | 353 | EPGAKGPTGDTGR  | -1 | training |
| CAFF_RIFPA | 401 | KQGEQGPQGPQGL  | -1 | training |
| CAFF_RIFPA | 404 | EQGPQGPQGLAGL  | -1 | training |
| CAFF_RIFPA | 452 | ETGAAGPPGAAGP  | -1 | training |
| CAFF_RIFPA | 458 | PPGAAGPTGARGP  | -1 | training |
| CAFF_RIFPA | 464 | PTGARGPPGPRGQ  | -1 | training |
| CAFF_RIFPA | 467 | ARGPPGPRGQQGF  | -1 | training |
| CAFF_RIFPA | 521 | DRGNVGPRGMPGE  | -1 | training |
| CAFF_RIFPA | 554 | QGGPPGPAGLVGL  | -1 | training |
| CAFF_RIFPA | 566 | LPGERGPKGVGGS  | -1 | training |
| CAFF_RIFPA | 581 | SRGDIGPRGKAGE  | -1 | training |
| CAFF_RIFPA | 605 | ENGLPGPSGLAAS  | -1 | training |
| CAFF_RIFPA | 629 | ERGSPPAGERGP   | -1 | training |
| CAFF_RIFPA | 635 | PAGERGPAGSQGI  | -1 | training |
| CAFF_RIFPA | 653 | PPGDAGPAGTKGD  | -1 | training |
| CAFF_RIFPA | 680 | KQGARGPRGLAGK  | -1 | training |
| CAFF_RIFPA | 719 | QPGLPGPSGQPGP  | -1 | training |
| CAFF_RIFPA | 725 | PSGQPGPSGPAGT  | -1 | training |
| CAFF_RIFPA | 728 | QPGPSGPAGTAGK  | -1 | training |
| CAFF_RIFPA | 779 | PPGVSGPTGAPGQ  | -1 | training |
| CAFF_RIFPA | 803 | LRGETGPMGGQGM  | -1 | training |
| CAFF_RIFPA | 818 | DGGPPGPSGDRGE  | -1 | training |
| CAFF_RIFPA | 830 | ERGNAGPQGPTGP  | -1 | training |
| CAFF_RIFPA | 833 | NAGPQGPTGPSGQ  | -1 | training |
| CAFF_RIFPA | 836 | PQGPTGPSGQAGA  | -1 | training |
| CAFF_RIFPA | 893 | LPGAAGPPGDRGE  | -1 | training |
| CAFF_RIFPA | 911 | GQGVQGPVGA PGS | -1 | training |
| CAFF_RIFPA | 920 | APGSQGPAGIMGM  | -1 | training |

|            |      |                |    |          |
|------------|------|----------------|----|----------|
| CAFF_RIFPA | 962  | HSGESGPPGAPGP  | -1 | training |
| CAFF_RIFPA | 968  | PPGAPGPRGARGE  | -1 | training |
| CAFF_RIFPA | 983  | GRGSQPPGKDGQ   | -1 | training |
| CAFF_RIFPA | 992  | KDGQPGPSGRVGP  | -1 | training |
| CAFF_RIFPA | 998  | PSGRVGPRGPSGD  | -1 | training |
| CAFF_RIFPA | 1001 | RVGPRGPSGDDGR  | -1 | training |
| CCAA_CONPI | 10   | IYDAKPPFSCAGL  | 1  | training |
| CCAA_CONPI | 24   | GGCVLPPNLRPKF  | 1  | training |
| CCAA_CONPI | 28   | LPPNLRPKFKEXX  | 1  | training |
| CCAA_CONPI | 9    | GIYDAKPPFSCAG  | -1 | training |
| CCAA_CONPI | 23   | RGGCVLPPNLRPK  | -1 | training |
| CDA_CONDE  | 3    | XXXXDCPTRCPTT  | 1  | training |
| CDA_CONDE  | 7    | DCPTRCPTTCANG  | 1  | training |
| CDA_CONDE  | 21   | ECCKGYPCVNKAC  | 1  | training |
| CDK3_CONCE | 55   | ECQVDTPGSSWGK  | 1  | training |
| CDK3_CONCE | 2    | XXXXXXMPKLAVVL | -1 | training |
| CDK3_CONCE | 15   | LVLLILPLSYFDA  | -1 | training |
| CDK3_CONCE | 93   | GHGCSCPGXXXXXX | -1 | training |
| CDK3_CONMS | 55   | ECQVNTPGSSWGK  | 1  | training |
| CDKA_CONVX | 55   | DCQVSTPGSKWGR  | 1  | training |
| CDKA_CONVX | 70   | LNRVCGPMCCPAS  | 1  | training |
| CDKA_CONVX | 74   | CGPMCCPASHCYC  | 1  | training |
| CDKA_CONVX | 15   | LVLLIFPLSYFIA  | -1 | training |
| CDKB_CONVX | 59   | INTRDSPWGRCCR  | 1  | training |
| CEX_CONCN  | 2    | XXXXXXAPWLVPSQ | 1  | training |
| CEX_CONCN  | 17   | TCCGYNPGTMCP   | 1  | training |
| CEX_CONCN  | 22   | NPGTMCPSCMCTN  | 1  | training |
| CEX_CONCN  | 6    | XAPWLVPSQITTC  | -1 | training |
| CGA_CONDI  | 53   | EKRGCDPTDGCQT  | 1  | training |
| CGA_CONDI  | 68   | CETDTGPCCCKPN  | 1  | training |
| CGA_CONDI  | 93   | CSCSGQPSDCPVX  | 1  | training |
| CGA_CONDI  | 97   | GQPSDCPVXXXXXX | 1  | training |
| CGA_CONDI  | 9    | TLGILLPIALLLP  | -1 | training |
| CGA_CONDI  | 15   | PIALLPLANPAE   | -1 | training |
| CGA_CONDI  | 19   | LLPLANPAENGDG  | -1 | training |
| CGA_CONDI  | 29   | GDGQAMPRTNLR   | -1 | training |
| CGA_CONDI  | 73   | GPCCCKPNFTCQI  | -1 | training |
| CGS_CONGE  | 10   | GRGSRCPPQCCMG  | 1  | training |
| CGS_CONGE  | 11   | RGSRCPPQCCMGL  | 1  | training |
| CGS_CONGE  | 24   | RCGRGNPQKCIGA  | -1 | training |
| CHI1_TOBAC | 67   | SQCPGGPTPTPPT  | 1  | training |
| CHI1_TOBAC | 69   | CPGGPTPTPPTPP  | 1  | training |
| CHI1_TOBAC | 71   | GGPTPTPPTPPGG  | 1  | training |

|             |     |                |    |          |
|-------------|-----|----------------|----|----------|
| CHI1_TOBAC  | 72  | GPTPTPPTPPGGG  | 1  | training |
| CHI1_TOBAC  | 74  | TPTPPTPPGGGDL  | 1  | training |
| CHI1_TOBAC  | 75  | PTPPTPPGGGDLG  | 1  | training |
| CHI1_TOBAC  | 36  | AGGARCPSSLCCS  | -1 | training |
| CHI1_TOBAC  | 64  | NCQSQCPCGGPTPT | -1 | training |
| CHI1_TOBAC  | 256 | IIGRWQPSAGDRA  | -1 | training |
| CHI2_TOBAC  | 67  | SQCPGGPTPPGGG  | 1  | training |
| CHI2_TOBAC  | 69  | CPGGPTPPGGGDL  | 1  | training |
| CHI2_TOBAC  | 56  | TNDYCGPGNCQSQ  | -1 | training |
| CHI2_TOBAC  | 64  | NCQSQCPCGGPTPP | -1 | training |
| CHI2_TOBAC  | 70  | PGGPTPPGGGDLG  | -1 | training |
| CHI2_TOBAC  | 115 | NAARSFPGFGTSG  | -1 | training |
| CHI2_TOBAC  | 149 | GGWATAPDGPYAW  | -1 | training |
| CHI2_TOBAC  | 152 | ATAPDGPYAWGYC  | -1 | training |
| CHI2_TOBAC  | 166 | LREQSPGDYCTP   | -1 | training |
| CHI2_TOBAC  | 172 | PGDYCTPSGQWPC  | -1 | training |
| CHI2_TOBAC  | 177 | TPSGQWPCAPGRK  | -1 | training |
| CHI2_TOBAC  | 180 | GQWPCAPGRKYFG  | -1 | training |
| CHI2_TOBAC  | 189 | KYFGRGPIQISHN  | -1 | training |
| CHI2_TOBAC  | 200 | HNYNYGPCGRAIG  | -1 | training |
| CHI2_TOBAC  | 213 | VDLLNNPDLVATD  | -1 | training |
| CHI2_TOBAC  | 220 | DLVATDPVISFKS  | -1 | training |
| CHI2_TOBAC  | 234 | LWFWMTPQSPKPS  | -1 | training |
| CHI2_TOBAC  | 237 | WMTPQSPKPSCHD  | -1 | training |
| CHI2_TOBAC  | 239 | TPQSPKPSCHDVI  | -1 | training |
| CHI2_TOBAC  | 251 | IIGRWQPSSADRA  | -1 | training |
| CHI2_TOBAC  | 262 | RAANRLPGFGVIT  | -1 | training |
| CHI2_TOBAC  | 303 | SILGVSPGDNLDC  | -1 | training |
| CI1BA_CONRA | 2   | XXXXXGPSFCKAD  | 1  | training |
| CI1BA_CONRA | 11  | CKADEKPCEYHAD  | 1  | training |
| CI1BA_CONRA | 29  | LSGICAPSTNWIL  | 1  | training |
| CI1BA_CONRA | 36  | STNWILPGCSTSS  | -1 | training |
| CI1BC_CONRA | 38  | RVKNRGPSPFCKAD | 1  | training |
| CI1BC_CONRA | 47  | CKADEKPCKYHAD  | 1  | training |
| CI1BC_CONRA | 65  | LGGICKPSTSWIG  | 1  | training |
| CI1BD_CONRA | 8   | CKKDRKPCSYHAD  | 1  | training |
| CI1BD_CONRA | 33  | STNWILPGCSTST  | -1 | training |
| CI2B_CONBE  | 53  | WGGCGHPCRHPGK  | 1  | training |
| CI2B_CONBE  | 23  | FLNLVVPTSACRA  | -1 | training |
| CI2B_CONBE  | 57  | GHPCRHPGKRSL   | -1 | training |
| CKP2_CONPI  | 3   | XXXXDEPEYAEAI  | 1  | training |
| CKP3_CONPI  | 3   | XXXXGEPEVAKWA  | 1  | training |
| CM3_CONTE   | 65  | CRFGCTPCCYXXX  | 1  | training |



|             |    |                |    |          |
|-------------|----|----------------|----|----------|
| CM3_CONTE   | 16 | ICLLLFPLTAVPM  | -1 | training |
| CM3_CONTE   | 21 | FPLTAVPMDGDQP  | -1 | training |
| CM3_CONTE   | 27 | PMDGDQPADRPAE  | -1 | training |
| CM3_CONTE   | 45 | ISFEQHMPFDATR  | -1 | training |
| CM31_CONLT  | 58 | RDECCEPQWCDGA  | 1  | training |
| CM31_CONLT  | 16 | TFLVLFPLTTLEL  | -1 | training |
| CM31_CONLT  | 27 | ELDTRPVERHAA   | -1 | training |
| CM31_CONLT  | 40 | IKQDLKPQERRGI  | -1 | training |
| CM31_CONLT  | 51 | GIRLHAPRDECCE  | -1 | training |
| CM3A_CONGE  | 56 | RRDCCTPPKKCKD  | 1  | training |
| CM3A_CONGE  | 57 | RDCCTPPKKCKDR  | 1  | training |
| CM3A_CONGE  | 67 | KDRQCKPQRCCAG  | 1  | training |
| CM3A_CONGE  | 16 | ICLLLFPLTALPM  | -1 | training |
| CM3A_CONGE  | 21 | FPLTALPMDGDEP  | -1 | training |
| CM3A_CONGE  | 27 | PMDGDEPANRPVE  | -1 | training |
| CM3A_CONGE  | 31 | DEPANRPVERMQD  | -1 | training |
| CM3A_CONGE  | 45 | ISSEQYPLFEKRR  | -1 | training |
| CM3A_CONMR  | 14 | CRFGCVPCCVXXX  | 1  | training |
| CM3A_CONQU  | 11 | DCLVCIPCCPNXX  | 1  | training |
| CM3A_CONQU  | 14 | VCIPCCPNXXXXX  | -1 | training |
| CM3AB_CONST | 8  | HGCCCKGPKGCSSR | 1  | training |
| CM3AB_CONST | 18 | SSRECRPQHCCXX  | 1  | training |
| CM3B_CONGE  | 6  | XRDCCTPPRKCKD  | 1  | training |
| CM3B_CONGE  | 7  | RDCCTPPRKCKDR  | 1  | training |
| CM3B_CONGE  | 17 | KDRRCKPMKCCAX  | 1  | training |
| CM3B_CONMR  | 16 | CRFGCTPCCWXXX  | 1  | training |
| CM3B_CONPI  | 8  | RVCCGYPMSCSR   | 1  | training |
| CM3B_CONPI  | 18 | KSRACKPSYCCXX  | 1  | training |
| CM3C_CONGE  | 6  | XRDCCTPPKKCKD  | 1  | training |
| CM3C_CONGE  | 17 | KDRRCKPLKCCAX  | 1  | training |
| CM3C_CONMR  | 13 | CRLGCRPCCRXXX  | 1  | training |
| CM3C_CONMR  | 4  | XXXCCAPSACRLG  | -1 | training |
| CM3C_CONTE  | 62 | TCFGCTPCCGXXX  | 1  | training |
| CM3C_CONTE  | 21 | FSLNAVPLDGDQP  | -1 | training |
| CM3C_CONTE  | 27 | PLDGDQPADQPAE  | -1 | training |
| CM3C_CONTE  | 31 | DQPADQPAERLLD  | -1 | training |
| CM3C_CONTE  | 45 | ISFENNPFYDPAK  | -1 | training |
| CM3C_CONTE  | 49 | NNPFYDPAKRCCR  | -1 | training |
| CM3D_CONMR  | 64 | CGLGCHPCCGXXX  | 1  | training |
| CM3D_CONMR  | 16 | ICLLLFPLTAVPL  | -1 | training |
| CM3D_CONMR  | 21 | FPLTAVPLDGDQP  | -1 | training |
| CM3D_CONMR  | 27 | PLDGDQPADRPAE  | -1 | training |
| CM3D_CONMR  | 31 | DQPADRPAERMQD  | -1 | training |

|             |    |                |    |          |
|-------------|----|----------------|----|----------|
| CM3D_CONMR  | 45 | ISSEHHPFFDPVK  | -1 | training |
| CM3D_CONMR  | 49 | HHPFFDPVKRCCR  | -1 | training |
| CM3E_CONPU  | 52 | LLERRHPPCCMYG  | 1  | training |
| CM3E_CONPU  | 53 | LERRHPPCCMYGR  | 1  | training |
| CM3E_CONPU  | 64 | GRCRRYPGCSSAS  | 1  | training |
| CM3E_CONPU  | 16 | ICLLFPITALLM   | -1 | training |
| CM3E_CONPU  | 27 | LMDGDQPADRPAE  | -1 | training |
| CM3E_CONPU  | 31 | DQPADRPAERMDY  | -1 | training |
| CM3G_CONMR  | 55 | AVRDCCPLPACPF  | 1  | training |
| CM3G_CONMR  | 65 | CPFGCNPCCGXXX  | 1  | training |
| CM3G_CONMR  | 21 | FALTAVPLDGDQP  | -1 | training |
| CM3G_CONMR  | 45 | ISSERHPMFD AVR | -1 | training |
| CM3G_CONMR  | 57 | RDCCPLPACPFGC  | -1 | training |
| CM3G_CONMR  | 60 | CPLPACPFGCNPC  | -1 | training |
| CM3J_CONRA  | 2  | XXXXXLPPCCTPP  | 1  | training |
| CM3J_CONRA  | 3  | XXXXLPPCCTPPK  | 1  | training |
| CM3J_CONRA  | 7  | LPPCCTPPKKHCP  | 1  | training |
| CM3J_CONRA  | 8  | PPCCTPPKKHCPA  | 1  | training |
| CM3J_CONRA  | 13 | PPKKHCPAPACKY  | 1  | training |
| CM3J_CONRA  | 15 | KKHCPAPACKYKP  | 1  | training |
| CM3J_CONRA  | 21 | PACKYKPCCKSXX  | 1  | training |
| CM7E_CONCN  | 7  | CKGTGKPCSRIAY  | 1  | training |
| CMCA_CONRE  | 4  | XXXGCCPPQWCGP  | 1  | training |
| CMCA_CONRE  | 5  | XXGCCPPQWCGPD  | 1  | training |
| CMCA_CONRE  | 10 | PPQWCGPDCTSPC  | 1  | training |
| CMCA_CONRE  | 15 | GPDCTSPCCXXXX  | 1  | training |
| CMCE_CONRE  | 11 | RPICTCPCCIGPX  | 1  | training |
| CMCE_CONRE  | 6  | XKCCMRPICTCPC  | -1 | training |
| CMCE_CONRE  | 16 | CPCCIGPXXXXXX  | -1 | training |
| CMCH_CONRE  | 5  | XXGCCSPWNCIQL  | 1  | training |
| CMCH_CONRE  | 15 | IQLRACPCCPNXX  | 1  | training |
| CMCH_CONRE  | 18 | RACPCCPNXXXXX  | 1  | training |
| CMCK_CONRE  | 11 | RPICMCPCIGAG   | 1  | training |
| CMCK_CONRE  | 6  | XKCCMRPICMCPC  | -1 | training |
| CO161_CONAH | 57 | RDECFSPGTFCGI  | 1  | training |
| CO161_CONAH | 65 | TFCGIKPLCCSA   | 1  | training |
| CO161_CONAH | 34 | GLKDLFPKARHEM  | -1 | training |
| CO161_CONAH | 43 | RHEMKNPEASKLN  | -1 | training |
| CO164_CONCL | 49 | CWLCLGPNACCRG  | 1  | training |
| CO164_CONCL | 28 | ADDMEYPKWLRGL  | -1 | training |
| CO164_CONCL | 63 | VCHDYCPRXXXXX  | -1 | training |
| CO165_CONAH | 55 | AGNYCGPTVMKIC  | 1  | training |
| CO165_CONAH | 67 | CCGFCSPFKICM   | 1  | training |

|             |     |                |    |          |
|-------------|-----|----------------|----|----------|
| CO165_CONAH | 76  | KICMNYPQNXXXX  | -1 | training |
| CO16A_CONGE | 49  | STRCKSPGSSCSP  | 1  | training |
| CO16A_CONGE | 55  | PGSSCSPTSYNCC  | 1  | training |
| CO16A_CONGE | 66  | CCRSCNPYTKRCY  | 1  | training |
| CO16A_CONPU | 57  | KEACYAPGTFCGI  | 1  | training |
| CO16A_CONPU | 75  | CSEFCLPGVCFGG  | -1 | training |
| CO16A_CONST | 55  | CRSSGSPCGVTSI  | 1  | training |
| CO16E_CONST | 65  | TFCGIHPGLCCSE  | 1  | training |
| CO17A_CONPU | 49  | STRCRIPNQKCFQ  | 1  | training |
| CO1A1_BRACN | 6   | XGATGAPGIAGAP  | 1  | training |
| CO1A1_BRACN | 12  | PGIAGAPGFPGAR  | 1  | training |
| CO1A1_BRACN | 15  | AGAPGFPGARGPS  | 1  | training |
| CO1A1_BRACN | 30  | QGPSGAPGPKGVO  | 1  | training |
| CO1A1_BRACN | 39  | KGVQGPQGPQGR   | 1  | training |
| CO1A1_BRACN | 54  | TGPIGPPGAPAGAP | 1  | training |
| CO1A1_BRACN | 60  | PGPAGAPGDKGEA  | 1  | training |
| CO1A1_BRACN | 84  | RGSAGPPGATGFP  | 1  | training |
| CO1A1_BRACN | 90  | PGATGFPGAAGR   | 1  | training |
| CO1A1_BRACN | 107 | AGPAGPPGAPGAR  | 1  | training |
| CO1A1_BRACN | 20  | FPGARGPSGPQGP  | -1 | training |
| CO1A1_BRACN | 23  | ARGPSGPQGPSGA  | -1 | training |
| CO1A1_BRACN | 26  | PSGPQGPSGAPGP  | -1 | training |
| CO1A1_BRACN | 32  | PSGAPGPKGVOGP  | -1 | training |
| CO1A1_BRACN | 38  | PKGVOGPQGPQGP  | -1 | training |
| CO1A1_BRACN | 41  | VQGPQGPQGPRL   | -1 | training |
| CO1A1_BRACN | 44  | PPGPQGPRLTGP   | -1 | training |
| CO1A1_BRACN | 50  | PRGLTGPIGPPGP  | -1 | training |
| CO1A1_BRACN | 53  | LTGPIGPPGPAGA  | -1 | training |
| CO1A1_BRACN | 56  | PIGPPGPAGAPGD  | -1 | training |
| CO1A1_BRACN | 68  | DKGEAGPSGPPGP  | -1 | training |
| CO1A1_BRACN | 71  | EAGPSGPPGPTGA  | -1 | training |
| CO1A1_BRACN | 72  | AGPSGPPGPTGAR  | -1 | training |
| CO1A1_BRACN | 74  | PSGPPGPTGARGS  | -1 | training |
| CO1A1_BRACN | 83  | ARGSAGPPGATGF  | -1 | training |
| CO1A1_BRACN | 100 | GRGETGPAGPAGP  | -1 | training |
| CO1A1_BRACN | 103 | ETGPAGPAGPPGP  | -1 | training |
| CO1A1_BRACN | 106 | PAGPAGPPGPAGA  | -1 | training |
| CO1A1_BRACN | 109 | PAGPPGPAGARXX  | -1 | training |
| CO1A1_CHICK | 179 | AGPRGLPGPPGAP  | 1  | training |
| CO1A1_CHICK | 182 | RGLPGPPGAPGPQ  | 1  | training |
| CO1A1_CHICK | 185 | PGPPGAPGPQGFQ  | 1  | training |
| CO1A1_CHICK | 194 | QGFQGPQGPQGP   | 1  | training |
| CO1A1_CHICK | 197 | QGPQGPQGPQGP   | 1  | training |

|             |     |               |   |          |
|-------------|-----|---------------|---|----------|
| CO1A1_CHICK | 200 | PGEPGEPGASGPM | 1 | training |
| CO1A1_CHICK | 215 | RGPAGPPGKNGDD | 1 | training |
| CO1A1_CHICK | 230 | AGKPGRPGQRGPP | 1 | training |
| CO1A1_CHICK | 236 | PGQRGPPGPQGAR | 1 | training |
| CO1A1_CHICK | 245 | QGARGLPGTAGLP | 1 | training |
| CO1A1_CHICK | 251 | PGTAGLPGMKGHR | 1 | training |
| CO1A1_CHICK | 269 | DGAKGQPGPAGPK | 1 | training |
| CO1A1_CHICK | 278 | AGPKGEPGSPGEN | 1 | training |
| CO1A1_CHICK | 281 | KGEPGSPGENGAP | 1 | training |
| CO1A1_CHICK | 287 | PGENGAPGQMGRP | 1 | training |
| CO1A1_CHICK | 296 | MGPRGLPGERGRP | 1 | training |
| CO1A1_CHICK | 302 | PGERGRPGPSGPA | 1 | training |
| CO1A1_CHICK | 317 | RGNDGAPGAAGPP | 1 | training |
| CO1A1_CHICK | 323 | PGAAGPPGPTGPA | 1 | training |
| CO1A1_CHICK | 332 | TGPAGPPGFPGAA | 1 | training |
| CO1A1_CHICK | 335 | AGPPGFPGAAGAK | 1 | training |
| CO1A1_CHICK | 362 | QGSRGEPGPPGPA | 1 | training |
| CO1A1_CHICK | 365 | RGEPGPPGPAGAA | 1 | training |
| CO1A1_CHICK | 377 | AGPAGNPGADGQP | 1 | training |
| CO1A1_CHICK | 383 | PGADGQPGAKGAT | 1 | training |
| CO1A1_CHICK | 392 | KGATGAPGIAGAP | 1 | training |
| CO1A1_CHICK | 416 | QGPSGAPGPKGNS | 1 | training |
| CO1A1_CHICK | 425 | KGNSGEPGAPGNK | 1 | training |
| CO1A1_CHICK | 428 | SGEPGAPGNKGDT | 1 | training |
| CO1A1_CHICK | 440 | TGAKGEPGPAGVQ | 1 | training |
| CO1A1_CHICK | 449 | AGVQGPPGPAGEE | 1 | training |
| CO1A1_CHICK | 464 | RGARGEPPGAGLP | 1 | training |
| CO1A1_CHICK | 470 | PGPAGLPGPAGER | 1 | training |
| CO1A1_CHICK | 479 | AGERGAPGSRGFP | 1 | training |
| CO1A1_CHICK | 485 | PGSRGFPGADGIA | 1 | training |
| CO1A1_CHICK | 497 | AGPKGPPGERGSP | 1 | training |
| CO1A1_CHICK | 503 | PGERGSPGAVGPK | 1 | training |
| CO1A1_CHICK | 512 | VGPKGSPGEAGRP | 1 | training |
| CO1A1_CHICK | 518 | PGEAGRPGEAGLP | 1 | training |
| CO1A1_CHICK | 524 | PGEAGLPGAKGLT | 1 | training |
| CO1A1_CHICK | 533 | KGLTGSPGSPGPD | 1 | training |
| CO1A1_CHICK | 536 | TGSPGSPGPDGKT | 1 | training |
| CO1A1_CHICK | 545 | DGKTGPPGPAGQD | 1 | training |
| CO1A1_CHICK | 554 | AGQDGRPGPAGPP | 1 | training |
| CO1A1_CHICK | 560 | PGPAGPPGARGQA | 1 | training |
| CO1A1_CHICK | 572 | AGVMGFPGPKGAA | 1 | training |
| CO1A1_CHICK | 581 | KGAAGEPGKPGER | 1 | training |
| CO1A1_CHICK | 584 | AGEPGKPGERGAP | 1 | training |

|             |     |                |   |          |
|-------------|-----|----------------|---|----------|
| CO1A1_CHICK | 590 | PGERGAPGPPGAV  | 1 | training |
| CO1A1_CHICK | 593 | RGAPGPPGAVGAA  | 1 | training |
| CO1A1_CHICK | 611 | AGAQQPPGPTGPA  | 1 | training |
| CO1A1_CHICK | 629 | QGPAGAPGFQGLP  | 1 | training |
| CO1A1_CHICK | 635 | PGFQGLPGPAGPP  | 1 | training |
| CO1A1_CHICK | 641 | PGPAGPPGEAGKP  | 1 | training |
| CO1A1_CHICK | 647 | PGEAGKPGEQGVP  | 1 | training |
| CO1A1_CHICK | 653 | PGEQGVPGNAGAP  | 1 | training |
| CO1A1_CHICK | 659 | PGNAGAPGPAGAR  | 1 | training |
| CO1A1_CHICK | 671 | RGERGFPPGERGVQ | 1 | training |
| CO1A1_CHICK | 680 | RGVQGPQGPQGPR  | 1 | training |
| CO1A1_CHICK | 692 | RGANGAPGNDGAK  | 1 | training |
| CO1A1_CHICK | 704 | KGDAGAPGAPGNE  | 1 | training |
| CO1A1_CHICK | 707 | AGAPGAPGNEGPP  | 1 | training |
| CO1A1_CHICK | 713 | PGNEGPPGLEGMP  | 1 | training |
| CO1A1_CHICK | 719 | PGLEGMPGERGAA  | 1 | training |
| CO1A1_CHICK | 728 | RGAAGLPGAKGDR  | 1 | training |
| CO1A1_CHICK | 737 | KGDRGDPGPKGAD  | 1 | training |
| CO1A1_CHICK | 746 | KGADGAPGKDGLR  | 1 | training |
| CO1A1_CHICK | 776 | KGEAGPPGPAGPT  | 1 | training |
| CO1A1_CHICK | 788 | TGARGAPGDRGEP  | 1 | training |
| CO1A1_CHICK | 794 | PGDRGEPGPPGPA  | 1 | training |
| CO1A1_CHICK | 797 | RGEPGPPGPAGFA  | 1 | training |
| CO1A1_CHICK | 806 | AGFAGPPGADGQP  | 1 | training |
| CO1A1_CHICK | 812 | PGADGQPGAKGET  | 1 | training |
| CO1A1_CHICK | 830 | KGDAGPPGPAGPT  | 1 | training |
| CO1A1_CHICK | 839 | AGPTGAPGPAGEV  | 1 | training |
| CO1A1_CHICK | 848 | AGEVGAPGPKGAR  | 1 | training |
| CO1A1_CHICK | 866 | PGATGFPGAAGR   | 1 | training |
| CO1A1_CHICK | 875 | AGRVGPPGPSGNI  | 1 | training |
| CO1A1_CHICK | 884 | SGNIGLPGPPGPA  | 1 | training |
| CO1A1_CHICK | 887 | IGLPGPPGPAGKE  | 1 | training |
| CO1A1_CHICK | 908 | TGPAGRPGEPGPA  | 1 | training |
| CO1A1_CHICK | 911 | AGRPGEPGPAGPP  | 1 | training |
| CO1A1_CHICK | 917 | PGPAGPPGPPGKEK | 1 | training |
| CO1A1_CHICK | 920 | AGPPGPPGKEKGSP | 1 | training |
| CO1A1_CHICK | 926 | PGEKGSPPGADGPI | 1 | training |
| CO1A1_CHICK | 935 | DGPIGAPGTPGPQ  | 1 | training |
| CO1A1_CHICK | 953 | RGVVGLPGQRGER  | 1 | training |
| CO1A1_CHICK | 962 | RGERGFPLPGPS   | 1 | training |
| CO1A1_CHICK | 965 | RGFPGLPGPSGEP  | 1 | training |
| CO1A1_CHICK | 971 | PGPSGEPGKQGPS  | 1 | training |
| CO1A1_CHICK | 986 | SGERGPPGPMGPP  | 1 | training |

|             |      |               |    |          |
|-------------|------|---------------|----|----------|
| CO1A1_CHICK | 992  | PGPMGPPGLAGPP | 1  | training |
| CO1A1_CHICK | 998  | PGLAGPPGEAGRE | 1  | training |
| CO1A1_CHICK | 1007 | AGREGAPGAEGAP | 1  | training |
| CO1A1_CHICK | 1013 | PGAEGAPGRDGAA | 1  | training |
| CO1A1_CHICK | 1034 | TGPAGPPGAPGAP | 1  | training |
| CO1A1_CHICK | 1037 | AGPPGAPGAPGAP | 1  | training |
| CO1A1_CHICK | 1040 | PGAPGAPGAPGPV | 1  | training |
| CO1A1_CHICK | 1109 | SGLQGPPGPPGAP | 1  | training |
| CO1A1_CHICK | 1112 | QGPPGPPGAPGEQ | 1  | training |
| CO1A1_CHICK | 1115 | PGPPGAPGEQGPS | 1  | training |
| CO1A1_CHICK | 1133 | AGPRGPPGSAGAA | 1  | training |
| CO1A1_CHICK | 1148 | DGLNGLPGPIGPP | 1  | training |
| CO1A1_CHICK | 1153 | LPGPIGPPGPRGR | 1  | training |
| CO1A1_CHICK | 1154 | PGPIGPPGPRGRT | 1  | training |
| CO1A1_CHICK | 1169 | VGPVGPVPPGPP  | 1  | training |
| CO1A1_CHICK | 1172 | VGPPGPPGPPGPP | 1  | training |
| CO1A1_CHICK | 1175 | PGPPGPPGPPGPP | 1  | training |
| CO1A1_CHICK | 1178 | PGPPGPPGPPSGG | 1  | training |
| CO1A1_CHICK | 48   | DKDVWKPEPCQIC | -1 | training |
| CO1A1_CHICK | 50   | DVWKPEPCQICVC | -1 | training |
| CO1A1_CHICK | 75   | EDTSDCPNAEIPF | -1 | training |
| CO1A1_CHICK | 80   | CPNAEIPFGECCP | -1 | training |
| CO1A1_CHICK | 86   | PFGECCPICPDVD | -1 | training |
| CO1A1_CHICK | 89   | ECCPICPDVDASP | -1 | training |
| CO1A1_CHICK | 95   | PDVDASPVYPESA | -1 | training |
| CO1A1_CHICK | 98   | DASPVYPESAGVE | -1 | training |
| CO1A1_CHICK | 106  | SAGVEGPKGDTGP | -1 | training |
| CO1A1_CHICK | 112  | PKGDTGPRGDRGL | -1 | training |
| CO1A1_CHICK | 119  | RGDRGLPGPPGRD | -1 | training |
| CO1A1_CHICK | 121  | DRGLPGPPGRDGI | -1 | training |
| CO1A1_CHICK | 122  | RGLPGPPGRDGIP | -1 | training |
| CO1A1_CHICK | 128  | PGRDGIPGQPGLP | -1 | training |
| CO1A1_CHICK | 131  | DGIPGQPGLPGPP | -1 | training |
| CO1A1_CHICK | 134  | PGQPGLPGPPGPP | -1 | training |
| CO1A1_CHICK | 136  | QPGLPGPPGPPGP | -1 | training |
| CO1A1_CHICK | 137  | PGLPGPPGPPGPP | -1 | training |
| CO1A1_CHICK | 139  | LPGPPGPPGPPGL | -1 | training |
| CO1A1_CHICK | 140  | PGPPGPPGPPGLG | -1 | training |
| CO1A1_CHICK | 142  | PPGPPGPPGLGGN | -1 | training |
| CO1A1_CHICK | 143  | PGPPGPPGLGGNF | -1 | training |
| CO1A1_CHICK | 151  | LGGNFAPQMSYGY | -1 | training |
| CO1A1_CHICK | 167  | SAGVAVPGPMGPA | -1 | training |
| CO1A1_CHICK | 169  | GVAVPGPMGPAGP | -1 | training |

|             |     |                |    |          |
|-------------|-----|----------------|----|----------|
| CO1A1_CHICK | 172 | VPGPMGPAGPRGL  | -1 | training |
| CO1A1_CHICK | 175 | PMGPAGPRGLPGP  | -1 | training |
| CO1A1_CHICK | 181 | PRGLPGPPGAPGP  | -1 | training |
| CO1A1_CHICK | 187 | PPGAPGPQGFQGP  | -1 | training |
| CO1A1_CHICK | 193 | PQGFQGPPEGPE   | -1 | training |
| CO1A1_CHICK | 205 | EPGASGPMGPRGP  | -1 | training |
| CO1A1_CHICK | 208 | ASGPMGPRGPAGP  | -1 | training |
| CO1A1_CHICK | 211 | PMGPRGPAGPPGK  | -1 | training |
| CO1A1_CHICK | 214 | PRGPAGPPGKNGD  | -1 | training |
| CO1A1_CHICK | 227 | DGEAGKPRPGQR   | -1 | training |
| CO1A1_CHICK | 235 | RPGQRGPPGPQGA  | -1 | training |
| CO1A1_CHICK | 238 | QRGPPGPQGARGL  | -1 | training |
| CO1A1_CHICK | 271 | AKGQGPAGPKGE   | -1 | training |
| CO1A1_CHICK | 274 | QGPAGPKGEPGS   | -1 | training |
| CO1A1_CHICK | 292 | APGQMGPRLPGE   | -1 | training |
| CO1A1_CHICK | 304 | ERGRPGPSGPAGA  | -1 | training |
| CO1A1_CHICK | 307 | RPGPSGPAGARGN  | -1 | training |
| CO1A1_CHICK | 322 | APGAAGPPGPTGP  | -1 | training |
| CO1A1_CHICK | 325 | AAGPPGPTGPAGP  | -1 | training |
| CO1A1_CHICK | 328 | PPGPTGPAGPPGF  | -1 | training |
| CO1A1_CHICK | 331 | PTGPAGPPGFPGA  | -1 | training |
| CO1A1_CHICK | 346 | AKGETGPQGARGS  | -1 | training |
| CO1A1_CHICK | 355 | ARGSEGPQGSERGE | -1 | training |
| CO1A1_CHICK | 364 | SRGEPGPPGPAGA  | -1 | training |
| CO1A1_CHICK | 367 | EPGPPGPAGAAGP  | -1 | training |
| CO1A1_CHICK | 373 | PAGAAGPAGNPGA  | -1 | training |
| CO1A1_CHICK | 418 | PSGAPGPKGNSGE  | -1 | training |
| CO1A1_CHICK | 442 | AKGEPGPAGVQGP  | -1 | training |
| CO1A1_CHICK | 448 | PAGVQGPPGPAGE  | -1 | training |
| CO1A1_CHICK | 451 | VQGPPGPAGEEGK  | -1 | training |
| CO1A1_CHICK | 466 | ARGEPGPAGLPGP  | -1 | training |
| CO1A1_CHICK | 472 | PAGLPGPAGERGA  | -1 | training |
| CO1A1_CHICK | 493 | ADGIAGPKGPPGE  | -1 | training |
| CO1A1_CHICK | 496 | IAGPKGPPGERGS  | -1 | training |
| CO1A1_CHICK | 508 | SPGAVGPKGSPGE  | -1 | training |
| CO1A1_CHICK | 538 | SPGSPGPDGKTGP  | -1 | training |
| CO1A1_CHICK | 544 | PDGKTGPPGPAGQ  | -1 | training |
| CO1A1_CHICK | 547 | KTGPPGPAGQDGR  | -1 | training |
| CO1A1_CHICK | 556 | QDGRPGPAGPPGA  | -1 | training |
| CO1A1_CHICK | 559 | RPGPAGPPGARGQ  | -1 | training |
| CO1A1_CHICK | 574 | VMGFPGPKGAAGE  | -1 | training |
| CO1A1_CHICK | 592 | ERGAPPPGAVGA   | -1 | training |
| CO1A1_CHICK | 610 | EAGAQQPPGPTGP  | -1 | training |

|             |      |                |    |          |
|-------------|------|----------------|----|----------|
| CO1A1_CHICK | 613  | AQGPPGPTGPAGE  | -1 | training |
| CO1A1_CHICK | 616  | PPGPTGPAGERGE  | -1 | training |
| CO1A1_CHICK | 625  | ERGEQGPAGAPGF  | -1 | training |
| CO1A1_CHICK | 637  | FQGLPGPAGPPPGE | -1 | training |
| CO1A1_CHICK | 640  | LPGPAGPPGEAGK  | -1 | training |
| CO1A1_CHICK | 661  | NAGAPGPAGARGE  | -1 | training |
| CO1A1_CHICK | 679  | ERGVQGPQPQGP   | -1 | training |
| CO1A1_CHICK | 682  | VQGPPGPQGPRGA  | -1 | training |
| CO1A1_CHICK | 685  | PPGPQGPRGANGA  | -1 | training |
| CO1A1_CHICK | 712  | APGNEGPPGLEGM  | -1 | training |
| CO1A1_CHICK | 739  | DRGDPGPKGADGA  | -1 | training |
| CO1A1_CHICK | 757  | LRGLTGPIGPPGP  | -1 | training |
| CO1A1_CHICK | 775  | DKGEAGPPGPAGP  | -1 | training |
| CO1A1_CHICK | 778  | EAGPPGPAGPTGA  | -1 | training |
| CO1A1_CHICK | 781  | PPGPAGPTGARGA  | -1 | training |
| CO1A1_CHICK | 796  | DRGEPGPPGPAGF  | -1 | training |
| CO1A1_CHICK | 799  | EPGPPGPAGFAGP  | -1 | training |
| CO1A1_CHICK | 829  | AKGDAGPPGPAGP  | -1 | training |
| CO1A1_CHICK | 832  | DAGPPGPAGPTGA  | -1 | training |
| CO1A1_CHICK | 835  | PPGPAGPTGAPGP  | -1 | training |
| CO1A1_CHICK | 841  | PTGAPGPAGEVGA  | -1 | training |
| CO1A1_CHICK | 850  | EVGAPGPKGARGS  | -1 | training |
| CO1A1_CHICK | 874  | AAGRVGPPGPSGN  | -1 | training |
| CO1A1_CHICK | 877  | RVGPPGPSNIGL   | -1 | training |
| CO1A1_CHICK | 886  | NIGLPGPPGPAGK  | -1 | training |
| CO1A1_CHICK | 889  | LPGPPGPAGKEGS  | -1 | training |
| CO1A1_CHICK | 898  | KEGSKGPRGETGP  | -1 | training |
| CO1A1_CHICK | 904  | PRGETGPAGRPGE  | -1 | training |
| CO1A1_CHICK | 913  | RPGEPPAGPPGP   | -1 | training |
| CO1A1_CHICK | 916  | EPGPAGPPGPPPGE | -1 | training |
| CO1A1_CHICK | 919  | PAGPPGPPGEKGS  | -1 | training |
| CO1A1_CHICK | 931  | SPGADGPIGAPGT  | -1 | training |
| CO1A1_CHICK | 938  | IGAPGTPGPQGIA  | -1 | training |
| CO1A1_CHICK | 940  | APGTPGPQGIAGQ  | -1 | training |
| CO1A1_CHICK | 967  | FPGLPGPSGEPGK  | -1 | training |
| CO1A1_CHICK | 976  | EPGKQGPSGASGE  | -1 | training |
| CO1A1_CHICK | 985  | ASGERGPPGPMGP  | -1 | training |
| CO1A1_CHICK | 988  | ERGPPGPMGPPGL  | -1 | training |
| CO1A1_CHICK | 991  | PPGPMGPPGLAGP  | -1 | training |
| CO1A1_CHICK | 997  | PPGLAGPPGEAGR  | -1 | training |
| CO1A1_CHICK | 1021 | RDGAAGPKGDRGE  | -1 | training |
| CO1A1_CHICK | 1030 | DRGETGPAGPPGA  | -1 | training |
| CO1A1_CHICK | 1033 | ETGPAGPPGAPGA  | -1 | training |



|             |      |               |    |          |
|-------------|------|---------------|----|----------|
| CO1A1_CHICK | 1043 | PGAPGAPGPVGP  | -1 | training |
| CO1A1_CHICK | 1045 | APGAPGPVGPAGK | -1 | training |
| CO1A1_CHICK | 1048 | APGPVGPAGKNGD | -1 | training |
| CO1A1_CHICK | 1060 | DRGETGPAGPAGP | -1 | training |
| CO1A1_CHICK | 1069 | PAGPPGPAGARGP | -1 | training |
| CO1A1_CHICK | 1075 | PAGARGPAGPQGP | -1 | training |
| CO1A1_CHICK | 1078 | ARGPAGPQGPRGD | -1 | training |
| CO1A1_CHICK | 1081 | PAGPQGPRGDKGE | -1 | training |
| CO1A1_CHICK | 1108 | FSGLQGPPGPPGA | -1 | training |
| CO1A1_CHICK | 1111 | LQPPGPPGAPGE  | -1 | training |
| CO1A1_CHICK | 1120 | APGEQGPSGASGP | -1 | training |
| CO1A1_CHICK | 1126 | PSGASGPAGPRGP | -1 | training |
| CO1A1_CHICK | 1129 | ASGPAGPRGPPGS | -1 | training |
| CO1A1_CHICK | 1132 | PAGPRGPPGSAGA | -1 | training |
| CO1A1_CHICK | 1150 | LNGLPGPIGPPGP | -1 | training |
| CO1A1_CHICK | 1156 | PIGPPGPRGRTGE | -1 | training |
| CO1A1_CHICK | 1165 | RTGEVGPVGPVGP | -1 | training |
| CO1A1_CHICK | 1168 | EVGPVGPVGPVGP | -1 | training |
| CO1A1_CHICK | 1171 | PVGPVGPVGPVGP | -1 | training |
| CO1A1_CHICK | 1174 | PPGPVGPVGPVGP | -1 | training |
| CO1A1_CHICK | 1177 | PPGPVGPVGPVGP | -1 | training |
| CO1A1_CHICK | 1180 | PPGPVGPVGPVGP | -1 | training |
| CO1A1_CHICK | 1181 | PGPPGPPSGGFDL | -1 | training |
| CO1A1_CHICK | 1191 | FDLSFLPQPPQEK | -1 | training |
| CO1A1_CHICK | 1193 | LSFLPQPPQEKAH | -1 | training |
| CO1A1_CHICK | 1194 | SFLPQPPQEKAH  | -1 | training |
| CO1A1_CHICK | 1237 | IENIRSPEGTRKN | -1 | training |
| CO1A1_CHICK | 1244 | EGTRKNPARTCRD | -1 | training |
| CO1A1_CHICK | 1267 | GEYWIDPNQGCNL | -1 | training |
| CO1A1_CHICK | 1291 | GETCVYPTQATIA | -1 | training |
| CO1A1_CHICK | 1307 | WYLSKNPKEKKHV | -1 | training |
| CO1A1_CHICK | 1334 | GGEGSNPADVAIQ | -1 | training |
| CO1A1_CHICK | 1427 | TKTSRLPIIDLAP | -1 | training |
| CO1A1_CHICK | 1433 | PIIDLAPMDVGAP | -1 | training |
| CO1A1_CHICK | 1439 | PMDVGAPDQEFGI | -1 | training |
| CO1A1_CHICK | 1449 | FGIDIGPVCFLXX | -1 | training |
| CO1A1_MAMAE | 173  | TGAAGPPGPTGPA | 1  | training |
| CO1A1_MAMAE | 182  | TGPAGPPGFPGAV | 1  | training |
| CO1A1_MAMAE | 185  | AGPPGFPGAVGAK | 1  | training |
| CO1A1_MAMAE | 212  | QGVREGPPGPPGA | 1  | training |
| CO1A1_MAMAE | 242  | KGANGAPGIAGAP | 1  | training |
| CO1A1_MAMAE | 251  | AGAPGFPGARGPA | 1  | training |
| CO1A1_MAMAE | 290  | AGAKGEPGPIGIQ | 1  | training |

|             |      |                |    |          |
|-------------|------|----------------|----|----------|
| CO1A1_MAMAE | 292  | AKGEPGPIGIQGP  | 1  | training |
| CO1A1_MAMAE | 299  | IGIQPPGPAGEE   | 1  | training |
| CO1A1_MAMAE | 314  | RGARGEPTGLP    | 1  | training |
| CO1A1_MAMAE | 320  | PGPTGLPGPPGER  | 1  | training |
| CO1A1_MAMAE | 323  | TGLPGPPGERGGP  | 1  | training |
| CO1A1_MAMAE | 335  | PGSRGFPGADGVA  | 1  | training |
| CO1A1_MAMAE | 362  | AGPKGSPGEAGRP  | 1  | training |
| CO1A1_MAMAE | 530  | RGVQGPPGPAGPR  | 1  | training |
| CO1A1_MAMAE | 758  | TGPAGRPGEVGGP  | 1  | training |
| CO1A1_MAMAE | 764  | PGEVGGPPGPPGPA | 1  | training |
| CO1A1_MAMAE | 767  | VGPPGPPGPAGEK  | 1  | training |
| CO1A1_MAMAE | 863  | PGAEGSPGRDGSP  | 1  | training |
| CO1A1_MAMAE | 869  | PGRDGSPGPKGDR  | 1  | training |
| CO1A1_MAMAE | 887  | SGPPGAPGAPGAP  | 1  | training |
| CO1A1_MAMAE | 959  | SGLQGPPGPPGSP  | 1  | training |
| CO1A1_MAMAE | 962  | QGPPGPPGSPGEQ  | 1  | training |
| CO1A1_MAMAE | 965  | PGPPGSPGEQGPS  | 1  | training |
| CO1A1_MAMAE | 998  | DGLNGLPGPPGPP  | 1  | training |
| CO1A1_MAMAE | 1001 | NGLPGPPGPPGPR  | 1  | training |
| CO1A1_MAMAE | 1004 | PGPPGPPGPRGRT  | 1  | training |
| CO1A1_MAMAE | 17   | AGGISVPGPMGPS  | -1 | training |
| CO1A1_MAMAE | 19   | GISVPGPMGPSGP  | -1 | training |
| CO1A1_MAMAE | 22   | VPGPMGPSGPRGL  | -1 | training |
| CO1A1_MAMAE | 25   | PMGPSGPRGLPGP  | -1 | training |
| CO1A1_MAMAE | 29   | SGPRGLPGPPGAP  | -1 | training |
| CO1A1_MAMAE | 58   | ASGPMGPRGPPGP  | -1 | training |
| CO1A1_MAMAE | 61   | PMGPRGPPGPPGK  | -1 | training |
| CO1A1_MAMAE | 62   | MGPRGPPGPPGKN  | -1 | training |
| CO1A1_MAMAE | 64   | PRGPPGPPGKNGD  | -1 | training |
| CO1A1_MAMAE | 65   | RGPPGPPGKNGDD  | -1 | training |
| CO1A1_MAMAE | 77   | DGEAGKPRPGER   | -1 | training |
| CO1A1_MAMAE | 80   | AGKPRPGERGPP   | -1 | training |
| CO1A1_MAMAE | 85   | RPGERGPPGPQGA  | -1 | training |
| CO1A1_MAMAE | 86   | PGERGPPGPQGAR  | -1 | training |
| CO1A1_MAMAE | 88   | ERGPPGPQGARGL  | -1 | training |
| CO1A1_MAMAE | 121  | AKGDAGPAGPKGE  | -1 | training |
| CO1A1_MAMAE | 124  | DAGPAGPKGEPGS  | -1 | training |
| CO1A1_MAMAE | 152  | PGERGRPGAPGPA  | -1 | training |
| CO1A1_MAMAE | 155  | RGRPGAPGPAGAR  | -1 | training |
| CO1A1_MAMAE | 157  | RPGAPGPAGARGN  | -1 | training |
| CO1A1_MAMAE | 172  | ATGAAGPPGPTGP  | -1 | training |
| CO1A1_MAMAE | 196  | AKGEAGPQGARGS  | -1 | training |
| CO1A1_MAMAE | 205  | ARGSEGPQGVGE   | -1 | training |

|             |     |               |    |          |
|-------------|-----|---------------|----|----------|
| CO1A1_MAMAE | 214 | VRGEPGPPGPAGA | -1 | training |
| CO1A1_MAMAE | 233 | PGADGQPGAKGAN | -1 | training |
| CO1A1_MAMAE | 256 | FPGARGPAGPQGP | -1 | training |
| CO1A1_MAMAE | 259 | ARGPAGPQGPSGA | -1 | training |
| CO1A1_MAMAE | 262 | PAGPQGPSGAPGP | -1 | training |
| CO1A1_MAMAE | 275 | KGNSGEPGAPGSK | -1 | training |
| CO1A1_MAMAE | 278 | SGEPGAPGSKGDA | -1 | training |
| CO1A1_MAMAE | 298 | PIGIQGPPGPAGE | -1 | training |
| CO1A1_MAMAE | 301 | IQGPPGPAGEEGK | -1 | training |
| CO1A1_MAMAE | 316 | ARGEPGPTGLPGP | -1 | training |
| CO1A1_MAMAE | 322 | PTGLPGPPGERGG | -1 | training |
| CO1A1_MAMAE | 329 | PGERGGPGSRGFP | -1 | training |
| CO1A1_MAMAE | 343 | ADGVAGPKGPAGE | -1 | training |
| CO1A1_MAMAE | 346 | VAGPKGPAGERGS | -1 | training |
| CO1A1_MAMAE | 353 | AGERGSPGPAGPK | -1 | training |
| CO1A1_MAMAE | 355 | ERGSPPAGPKGS  | -1 | training |
| CO1A1_MAMAE | 358 | SPGPAGPKGSPGE | -1 | training |
| CO1A1_MAMAE | 404 | AGQDGRPGPPGPP | -1 | training |
| CO1A1_MAMAE | 406 | QDGRPGPPGPPGA | -1 | training |
| CO1A1_MAMAE | 407 | DGRPGPPGPPGAR | -1 | training |
| CO1A1_MAMAE | 409 | RPGPPGPPGARGQ | -1 | training |
| CO1A1_MAMAE | 410 | PGPPGPPGARGQA | -1 | training |
| CO1A1_MAMAE | 431 | KGAAGEPGKAGER | -1 | training |
| CO1A1_MAMAE | 440 | AGERGVPGPPGAV | -1 | training |
| CO1A1_MAMAE | 442 | ERGVPGPPGAVGA | -1 | training |
| CO1A1_MAMAE | 443 | RGVPGPPGAVGAA | -1 | training |
| CO1A1_MAMAE | 460 | EAGAQQPPGPAGP | -1 | training |
| CO1A1_MAMAE | 461 | AGAQQPPGPAGPA | -1 | training |
| CO1A1_MAMAE | 463 | AQPPGPAGPAGE  | -1 | training |
| CO1A1_MAMAE | 466 | PPGPAGPAGERGE | -1 | training |
| CO1A1_MAMAE | 475 | ERGEQGPAGSPGF | -1 | training |
| CO1A1_MAMAE | 479 | QGPAGSPGFQGLP | -1 | training |
| CO1A1_MAMAE | 503 | PGEQGVPGDLGAP | -1 | training |
| CO1A1_MAMAE | 509 | PGDLGAPGPSGAR | -1 | training |
| CO1A1_MAMAE | 511 | DLGAPGPSGARGE | -1 | training |
| CO1A1_MAMAE | 529 | ERGVQGPAGPAGP | -1 | training |
| CO1A1_MAMAE | 532 | VQGPPGPAGPRGS | -1 | training |
| CO1A1_MAMAE | 535 | PPGPAGPRGSNGA | -1 | training |
| CO1A1_MAMAE | 542 | RGSNGAPGNDGAK | -1 | training |
| CO1A1_MAMAE | 554 | KGDAGAPGAPGSQ | -1 | training |
| CO1A1_MAMAE | 557 | AGAPGAPGSQGAP | -1 | training |
| CO1A1_MAMAE | 563 | PGSQGAPGLQGMP | -1 | training |
| CO1A1_MAMAE | 569 | PGLQGMPGERGAA | -1 | training |

|             |     |               |    |          |
|-------------|-----|---------------|----|----------|
| CO1A1_MAMAE | 578 | RGAAGLPGPKGDR | -1 | training |
| CO1A1_MAMAE | 580 | AAGLPGPKGDRGD | -1 | training |
| CO1A1_MAMAE | 589 | DRGDAGPKGADGS | -1 | training |
| CO1A1_MAMAE | 596 | KGADGSPGKDGPR | -1 | training |
| CO1A1_MAMAE | 601 | SPGKDGPRGLTGP | -1 | training |
| CO1A1_MAMAE | 625 | DKGEAGPSGPAGP | -1 | training |
| CO1A1_MAMAE | 628 | EAGPSGPAGPTGA | -1 | training |
| CO1A1_MAMAE | 631 | PSGPAGPTGARGA | -1 | training |
| CO1A1_MAMAE | 662 | PGADGQPGAKGEP | -1 | training |
| CO1A1_MAMAE | 668 | PGAKGEPGDAGAK | -1 | training |
| CO1A1_MAMAE | 689 | AGPTGAPGPIGNV | -1 | training |
| CO1A1_MAMAE | 691 | PTGAPGPIGNVGA | -1 | training |
| CO1A1_MAMAE | 698 | IGNVGAPGAKGAR | -1 | training |
| CO1A1_MAMAE | 725 | AGRVGPPGPSGNA | -1 | training |
| CO1A1_MAMAE | 727 | RVGPPGPSGNAGP | -1 | training |
| CO1A1_MAMAE | 733 | PSGNAGPPGPPGP | -1 | training |
| CO1A1_MAMAE | 734 | SGNAGPPGPPGPA | -1 | training |
| CO1A1_MAMAE | 736 | NAGPPGPPGPAGK | -1 | training |
| CO1A1_MAMAE | 737 | AGPPGPPGPAGKE | -1 | training |
| CO1A1_MAMAE | 739 | PPGPPGPAGKEGG | -1 | training |
| CO1A1_MAMAE | 748 | KEGGKGRGETGP  | -1 | training |
| CO1A1_MAMAE | 763 | RPGEVGPPGPPGP | -1 | training |
| CO1A1_MAMAE | 766 | EVGPPGPPGPAGE | -1 | training |
| CO1A1_MAMAE | 769 | PPGPPGPAGEKGS | -1 | training |
| CO1A1_MAMAE | 776 | AGEKGSPGADGPA | -1 | training |
| CO1A1_MAMAE | 781 | SPGADGPAGAPGT | -1 | training |
| CO1A1_MAMAE | 785 | DGPAGAPGTPGPQ | -1 | training |
| CO1A1_MAMAE | 788 | AGAPGTPGPQGIG | -1 | training |
| CO1A1_MAMAE | 790 | APGTPGPQGIGGQ | -1 | training |
| CO1A1_MAMAE | 826 | EPGKQGPSGSSGE | -1 | training |
| CO1A1_MAMAE | 835 | SSGERGPPGPAGP | -1 | training |
| CO1A1_MAMAE | 836 | SGERGPPGPAGPP | -1 | training |
| CO1A1_MAMAE | 838 | ERGPPGPAGPPGL | -1 | training |
| CO1A1_MAMAE | 841 | PPGPAGPPGLAGP | -1 | training |
| CO1A1_MAMAE | 842 | PGPAGPPGLAGPP | -1 | training |
| CO1A1_MAMAE | 847 | PPGLAGPPGESGR | -1 | training |
| CO1A1_MAMAE | 848 | PGLAGPPGESGRE | -1 | training |
| CO1A1_MAMAE | 857 | SGREGAPGAEGSP | -1 | training |
| CO1A1_MAMAE | 871 | RDGSPGPKGDRGE | -1 | training |
| CO1A1_MAMAE | 880 | DRGETGPSGPPGA | -1 | training |
| CO1A1_MAMAE | 883 | ETGPSGPPGAPGA | -1 | training |
| CO1A1_MAMAE | 884 | TGPSGPPGAPGAP | -1 | training |
| CO1A1_MAMAE | 898 | APGPVGPAGKSGD | -1 | training |

|             |      |               |    |          |
|-------------|------|---------------|----|----------|
| CO1A1_MAMAE | 913  | ETGPAGPAGPAGP | -1 | training |
| CO1A1_MAMAE | 916  | PAGPAGPAGPAGV | -1 | training |
| CO1A1_MAMAE | 919  | PAGPAGPAGVRGP | -1 | training |
| CO1A1_MAMAE | 925  | PAGVRGPAGPQGP | -1 | training |
| CO1A1_MAMAE | 928  | VRGPAGPQGPRGD | -1 | training |
| CO1A1_MAMAE | 958  | FSGLQGPPGPPGS | -1 | training |
| CO1A1_MAMAE | 961  | LQGPPGPPGSPGE | -1 | training |
| CO1A1_MAMAE | 970  | SPGEQGPSGASGP | -1 | training |
| CO1A1_MAMAE | 983  | AGPRGPPGSAGAP | -1 | training |
| CO1A1_MAMAE | 989  | PGSAGAPGKDGLN | -1 | training |
| CO1A1_MAMAE | 1000 | LNGLPGPPGPPGP | -1 | training |
| CO1A1_MAMAE | 1003 | LPGPPGPPGPRGR | -1 | training |
| CO1A1_MAMAE | 1006 | PPGPPGPRGRTGD | -1 | training |
| CO1A1_MAMAE | 1015 | RTGDAGPVGPPGP | -1 | training |
| CO1A1_MAMAE | 1018 | DAGPVGPPGPPGP | -1 | training |
| CO1A1_MAMAE | 1019 | AGPVGPPGPPGPP | -1 | training |
| CO1A1_MAMAE | 1028 | PGPPGPPGPPSGA | -1 | training |
| CO1A1_MAMAE | 1030 | PPGPPGPPSGAFD | -1 | training |
| CO1A1_MAMAE | 1031 | PGPPGPPSGAFDF | -1 | training |
| CO1A1_MAMAE | 1041 | FDFSFLPQPPQEK | -1 | training |
| CO1A1_MAMAE | 1043 | FSFLPQPPQEKAH | -1 | training |
| CO1A2_BRACN | 6    | XGSNGEPGSAGPP | 1  | training |
| CO1A2_BRACN | 12   | PGSAGPPGPAGLR | 1  | training |
| CO1A2_BRACN | 33   | VGPAGPPGSRXXX | 1  | training |
| CO1A2_BRACN | 11   | EPGSAGPPGPAGL | -1 | training |
| CO1A2_BRACN | 14   | SAGPPGPAGLRGL | -1 | training |
| CO1A2_BRACN | 21   | AGLRGLPGESGAV | -1 | training |
| CO1A2_BRACN | 29   | ESGAVGPAGPPGS | -1 | training |
| CO1A2_BRACN | 32   | AVGPAGPPGSRXX | -1 | training |
| CO1A2_CHICK | 439  | NGDAGRPGEPGLM | 1  | training |
| CO1A2_CHICK | 442  | AGRPGEPGLMGPR | 1  | training |
| CO1A2_CHICK | 35   | SAGRKGPRGDKGP | -1 | training |
| CO1A2_CHICK | 41   | PRGDKGPQGERGP | -1 | training |
| CO1A2_CHICK | 47   | PQGERGPPGPPGR | -1 | training |
| CO1A2_CHICK | 48   | QGERGPPGPPGRD | -1 | training |
| CO1A2_CHICK | 50   | ERGPPGPPGRDGE | -1 | training |
| CO1A2_CHICK | 51   | RGPPGPPGRDGED | -1 | training |
| CO1A2_CHICK | 59   | RDGEDGPPGPPGP | -1 | training |
| CO1A2_CHICK | 60   | DGEDGPPGPPGPP | -1 | training |
| CO1A2_CHICK | 62   | EDGPPGPPGPPGP | -1 | training |
| CO1A2_CHICK | 63   | DGPPGPPGPPGPP | -1 | training |
| CO1A2_CHICK | 65   | PPGPPGPPGPPGL | -1 | training |
| CO1A2_CHICK | 81   | FAAQYDPSKAADF | -1 | training |

|             |     |               |    |          |
|-------------|-----|---------------|----|----------|
| CO1A2_CHICK | 89  | KAADFGPGPMGLM | -1 | training |
| CO1A2_CHICK | 91  | ADFGPGPMGLMGP | -1 | training |
| CO1A2_CHICK | 97  | PMGLMGPRGPPGA | -1 | training |
| CO1A2_CHICK | 100 | LMGPRGPPGASGP | -1 | training |
| CO1A2_CHICK | 101 | MGPRGPPGASGPP | -1 | training |
| CO1A2_CHICK | 106 | PPGASGPPGPPGF | -1 | training |
| CO1A2_CHICK | 107 | PGASGPPGPPGFQ | -1 | training |
| CO1A2_CHICK | 109 | ASGPPGPPGFQGV | -1 | training |
| CO1A2_CHICK | 110 | SGPPGPPGFQGV  | -1 | training |
| CO1A2_CHICK | 116 | PGFQGVPGEPGEP | -1 | training |
| CO1A2_CHICK | 119 | QGVPGEPGEPGQT | -1 | training |
| CO1A2_CHICK | 122 | PGEPGEPGQTGPQ | -1 | training |
| CO1A2_CHICK | 127 | EPGQTGPQGPRGP | -1 | training |
| CO1A2_CHICK | 130 | QTGPQGPRGPPGP | -1 | training |
| CO1A2_CHICK | 133 | PQGPRGPPGPPGK | -1 | training |
| CO1A2_CHICK | 134 | QGPRGPPGPPGKA | -1 | training |
| CO1A2_CHICK | 136 | PRGPPGPPGKAGE | -1 | training |
| CO1A2_CHICK | 137 | RGPPGPPGKAGED | -1 | training |
| CO1A2_CHICK | 146 | AGEDGHPGKPRGP | -1 | training |
| CO1A2_CHICK | 149 | DGHPGKPRPGER  | -1 | training |
| CO1A2_CHICK | 152 | PGKPRPGERGVA  | -1 | training |
| CO1A2_CHICK | 160 | ERGVAGPQGARGF | -1 | training |
| CO1A2_CHICK | 167 | QGARGFPGTGPP  | -1 | training |
| CO1A2_CHICK | 170 | RGFPGTGPPGFK  | -1 | training |
| CO1A2_CHICK | 172 | FPGTGPFGFKGI  | -1 | training |
| CO1A2_CHICK | 173 | PGTGPFGFKGIR  | -1 | training |
| CO1A2_CHICK | 191 | DGLTGQPGAPGTK | -1 | training |
| CO1A2_CHICK | 194 | TGQPGAPGTKGEP | -1 | training |
| CO1A2_CHICK | 200 | PGTKGEPGAPGEN | -1 | training |
| CO1A2_CHICK | 203 | KGEPGAPGENGTP | -1 | training |
| CO1A2_CHICK | 209 | PGENGTGQPGAR  | -1 | training |
| CO1A2_CHICK | 212 | NGTGPQPGARGLP | -1 | training |
| CO1A2_CHICK | 218 | PGARGLPGERGRI | -1 | training |
| CO1A2_CHICK | 227 | RGRIGAPGPAGAR | -1 | training |
| CO1A2_CHICK | 229 | RIGAPGPAGARGS | -1 | training |
| CO1A2_CHICK | 241 | SDGSAGPTGPAXX | -1 | training |
| CO1A2_CHICK | 244 | SAGPTGPAXXXX  | -1 | training |
| CO1A2_CHICK | 267 | XXGEIGPAGNEGP | -1 | training |
| CO1A2_CHICK | 273 | PAGNEGPTGPAGP | -1 | training |
| CO1A2_CHICK | 276 | NEGPTGPAGPRGE | -1 | training |
| CO1A2_CHICK | 279 | PTGPAGPRGEIGL | -1 | training |
| CO1A2_CHICK | 286 | RGEIGLPSSGPV  | -1 | training |
| CO1A2_CHICK | 291 | LPGSSGPVGPVGN | -1 | training |

|             |     |               |    |          |
|-------------|-----|---------------|----|----------|
| CO1A2_CHICK | 294 | SSGPVGPPGNPGA | -1 | training |
| CO1A2_CHICK | 295 | SGPVGPPGNPGAN | -1 | training |
| CO1A2_CHICK | 298 | VGPPGNPGANGLP | -1 | training |
| CO1A2_CHICK | 304 | PGANGLPGAKGAA | -1 | training |
| CO1A2_CHICK | 313 | KGAAGLPGVAGAP | -1 | training |
| CO1A2_CHICK | 319 | PGVAGAPGLPGPR | -1 | training |
| CO1A2_CHICK | 322 | AGAPGLPGPRGIP | -1 | training |
| CO1A2_CHICK | 324 | APGLPGPRGIPGP | -1 | training |
| CO1A2_CHICK | 328 | PGPRGIPGPPGPA | -1 | training |
| CO1A2_CHICK | 330 | PRGIPGPPGPAGP | -1 | training |
| CO1A2_CHICK | 331 | RGIPGPPGPAGPS | -1 | training |
| CO1A2_CHICK | 333 | IPGPPGPAGPSGA | -1 | training |
| CO1A2_CHICK | 336 | PPGPAGPSGARGL | -1 | training |
| CO1A2_CHICK | 346 | RGLVGEPPGAGAK | -1 | training |
| CO1A2_CHICK | 348 | LVGEPPGAGAKGE | -1 | training |
| CO1A2_CHICK | 361 | SGNKGEPGAAGPP | -1 | training |
| CO1A2_CHICK | 366 | EPGAAGPPGPPGP | -1 | training |
| CO1A2_CHICK | 367 | PGAAGPPGPPGPS | -1 | training |
| CO1A2_CHICK | 369 | AAGPPGPPGPSGE | -1 | training |
| CO1A2_CHICK | 370 | AGPPGPPGPSGEE | -1 | training |
| CO1A2_CHICK | 372 | PPGPPGPSGEEGK | -1 | training |
| CO1A2_CHICK | 385 | RGSNGEPGSAGPP | -1 | training |
| CO1A2_CHICK | 393 | SAGPPGPAGLRGE | -1 | training |
| CO1A2_CHICK | 400 | AGLRGEPGSRGLP | -1 | training |
| CO1A2_CHICK | 406 | PGSRGLPGADGRA | -1 | training |
| CO1A2_CHICK | 417 | RAGVMGPAGNRGA | -1 | training |
| CO1A2_CHICK | 426 | NRGASGPVGAKGP | -1 | training |
| CO1A2_CHICK | 432 | PVGAKGPNGDAGR | -1 | training |
| CO1A2_CHICK | 447 | EPGLMGPRXXXXX | -1 | training |
| CO1A2_CHICK | 469 | XXXXGFPGADGRV | -1 | training |
| CO1A2_CHICK | 477 | ADGRVGPIGPAGN | -1 | training |
| CO1A2_CHICK | 480 | RVGPIGPAGNRGE | -1 | training |
| CO1A2_CHICK | 487 | AGNRGEPGNIGFP | -1 | training |
| CO1A2_CHICK | 493 | PGNIGFPGPKGPT | -1 | training |
| CO1A2_CHICK | 495 | NIGFPGPKGPTGE | -1 | training |
| CO1A2_CHICK | 498 | FPGPKGPTGEPGK | -1 | training |
| CO1A2_CHICK | 502 | KGPTGEPGKPGEK | -1 | training |
| CO1A2_CHICK | 505 | TGEPGKPGEKGNV | -1 | training |
| CO1A2_CHICK | 516 | NVGLAGPRGAPGP | -1 | training |
| CO1A2_CHICK | 520 | AGPRGAPGPEGNN | -1 | training |
| CO1A2_CHICK | 522 | PRGAPGPEGNNGA | -1 | training |
| CO1A2_CHICK | 531 | NNGAQGPPGVTGN | -1 | training |
| CO1A2_CHICK | 532 | NGAQGPPGVTGNQ | -1 | training |

|             |     |                |    |          |
|-------------|-----|----------------|----|----------|
| CO1A2_CHICK | 546 | AKGETGPAGPPGF  | -1 | training |
| CO1A2_CHICK | 549 | ETGPAGPPGFQGL  | -1 | training |
| CO1A2_CHICK | 550 | TGPAGPPGFQGLP  | -1 | training |
| CO1A2_CHICK | 556 | PGFQGLPGPSGPA  | -1 | training |
| CO1A2_CHICK | 558 | FQGLPGPSGPAE   | -1 | training |
| CO1A2_CHICK | 561 | LPGPSGPAEAGK   | -1 | training |
| CO1A2_CHICK | 568 | AGEAGKPGERGLH  | -1 | training |
| CO1A2_CHICK | 580 | HGEFGVPGPAGPR  | -1 | training |
| CO1A2_CHICK | 582 | EFGVPGPAGPRGE  | -1 | training |
| CO1A2_CHICK | 585 | VPGPAGPRGERGL  | -1 | training |
| CO1A2_CHICK | 592 | RGERGLPGESGAV  | -1 | training |
| CO1A2_CHICK | 600 | ESGAVGPAGPIGS  | -1 | training |
| CO1A2_CHICK | 603 | AVGPAGPIGSRGP  | -1 | training |
| CO1A2_CHICK | 609 | PIGSRGPSGPPGP  | -1 | training |
| CO1A2_CHICK | 612 | SRGPSGPPGPDGN  | -1 | training |
| CO1A2_CHICK | 613 | RGPSGPPGPDGNK  | -1 | training |
| CO1A2_CHICK | 615 | PSGPPGPDGNKGE  | -1 | training |
| CO1A2_CHICK | 622 | DGNKGEPGNVGA   | -1 | training |
| CO1A2_CHICK | 627 | EPGNVGPAGAPGP  | -1 | training |
| CO1A2_CHICK | 631 | VGPAGAPGPAGPG  | -1 | training |
| CO1A2_CHICK | 633 | PAGAPGPAGPGGI  | -1 | training |
| CO1A2_CHICK | 636 | APGPAGPGGIPGE  | -1 | training |
| CO1A2_CHICK | 640 | AGPGGIPGERGVA  | -1 | training |
| CO1A2_CHICK | 649 | RGVAGVPGGKGEK  | -1 | training |
| CO1A2_CHICK | 658 | KGEKGAPGLRGDT  | -1 | training |
| CO1A2_CHICK | 676 | DGARGLPGAIGAP  | -1 | training |
| CO1A2_CHICK | 682 | PGAIGAPGPAGGA  | -1 | training |
| CO1A2_CHICK | 684 | AIGAPGPAGGAGD  | -1 | training |
| CO1A2_CHICK | 696 | DRGEGGPAGPAGP  | -1 | training |
| CO1A2_CHICK | 699 | EGGPAGPAGPAGA  | -1 | training |
| CO1A2_CHICK | 702 | PAGPAGPAGARGI  | -1 | training |
| CO1A2_CHICK | 709 | AGARGIPGERGEP  | -1 | training |
| CO1A2_CHICK | 715 | PGERGERGPGVGPS | -1 | training |
| CO1A2_CHICK | 717 | ERGERGPGVGPSGF | -1 | training |
| CO1A2_CHICK | 720 | EPGPVGPSGFAGP  | -1 | training |
| CO1A2_CHICK | 726 | PSGFAGPPGAAGQ  | -1 | training |
| CO1A2_CHICK | 727 | SGFAGPPGAAGQP  | -1 | training |
| CO1A2_CHICK | 733 | PGAAGQPGAKGER  | -1 | training |
| CO1A2_CHICK | 741 | AKGERGPKGPKGE  | -1 | training |
| CO1A2_CHICK | 744 | ERGPKGPKGETGP  | -1 | training |
| CO1A2_CHICK | 750 | PKGETGPTGAIGP  | -1 | training |
| CO1A2_CHICK | 756 | PTGAIGPIGASGP  | -1 | training |
| CO1A2_CHICK | 762 | PIGASGPPGPVGA  | -1 | training |



|             |     |                |    |          |
|-------------|-----|----------------|----|----------|
| CO1A2_CHICK | 763 | IGASGPPGPVGAA  | -1 | training |
| CO1A2_CHICK | 765 | ASGPPGPVGAAGP  | -1 | training |
| CO1A2_CHICK | 771 | PVGAAGPAGPRGD  | -1 | training |
| CO1A2_CHICK | 774 | AAGPAGPRGDAGP  | -1 | training |
| CO1A2_CHICK | 780 | PRGDAGPPGMTGF  | -1 | training |
| CO1A2_CHICK | 781 | RGDAGPPGMTGFP  | -1 | training |
| CO1A2_CHICK | 787 | PGMTGFPGAAGR   | -1 | training |
| CO1A2_CHICK | 795 | AAGRVGPPGPAGI  | -1 | training |
| CO1A2_CHICK | 796 | AGRVGPPGPAGIT  | -1 | training |
| CO1A2_CHICK | 798 | RVGPPGPAGITGP  | -1 | training |
| CO1A2_CHICK | 804 | PAGITGPPGPPGP  | -1 | training |
| CO1A2_CHICK | 805 | AGITGPPGPPGPA  | -1 | training |
| CO1A2_CHICK | 807 | ITGPPGPPGPAGK  | -1 | training |
| CO1A2_CHICK | 808 | TGPPGPPGPAGKD  | -1 | training |
| CO1A2_CHICK | 810 | PPGPPGPAGKDGP  | -1 | training |
| CO1A2_CHICK | 816 | PAGKDGPRGLRGD  | -1 | training |
| CO1A2_CHICK | 825 | LRGDVGPVGRGTGE | -1 | training |
| CO1A2_CHICK | 837 | EQGIAGPPGFAGE  | -1 | training |
| CO1A2_CHICK | 838 | QGIAGPPGFAGEK  | -1 | training |
| CO1A2_CHICK | 846 | FAGEKGPSGEAGA  | -1 | training |
| CO1A2_CHICK | 855 | EAGAAGPPGTPGP  | -1 | training |
| CO1A2_CHICK | 856 | AGAAGPPGTPGPQ  | -1 | training |
| CO1A2_CHICK | 859 | AGPPGTPGPQGIL  | -1 | training |
| CO1A2_CHICK | 861 | PPGTPGPQGILGA  | -1 | training |
| CO1A2_CHICK | 868 | QGILGAPGILGLP  | -1 | training |
| CO1A2_CHICK | 874 | PGILGLPGSRGER  | -1 | training |
| CO1A2_CHICK | 883 | RGERGLPGIAGAT  | -1 | training |
| CO1A2_CHICK | 892 | AGATGEPGPLGVS  | -1 | training |
| CO1A2_CHICK | 894 | ATGEPGPLGVSGP  | -1 | training |
| CO1A2_CHICK | 900 | PLGVSGPPGARGP  | -1 | training |
| CO1A2_CHICK | 901 | LGVSPPGARGPS   | -1 | training |
| CO1A2_CHICK | 906 | PPGARGPSGPVGS  | -1 | training |
| CO1A2_CHICK | 909 | ARGPSGPVGSPPG  | -1 | training |
| CO1A2_CHICK | 913 | SGPVGSPGPNAP   | -1 | training |
| CO1A2_CHICK | 915 | PVGSPPGPNAPGE  | -1 | training |
| CO1A2_CHICK | 919 | PGPNAPGEAGR    | -1 | training |
| CO1A2_CHICK | 928 | AGRDGNPNDGPP   | -1 | training |
| CO1A2_CHICK | 933 | NPNNDGPPGRDGA  | -1 | training |
| CO1A2_CHICK | 934 | PNNDGPPGRDGAP  | -1 | training |
| CO1A2_CHICK | 940 | PGRDGAPGFKGER  | -1 | training |
| CO1A2_CHICK | 949 | KGERGAPGNPGPS  | -1 | training |
| CO1A2_CHICK | 952 | RGAPGNPGPSGAL  | -1 | training |
| CO1A2_CHICK | 954 | APGNPGPSGALGA  | -1 | training |

|             |      |               |    |          |
|-------------|------|---------------|----|----------|
| CO1A2_CHICK | 961  | SGALGAPGPHGQV | -1 | training |
| CO1A2_CHICK | 963  | ALGAPGPHGQVGP | -1 | training |
| CO1A2_CHICK | 969  | PHGQVGPSGKPGN | -1 | training |
| CO1A2_CHICK | 973  | VGPSGKPGNRGDP | -1 | training |
| CO1A2_CHICK | 979  | PGNRGDPGPVGPV | -1 | training |
| CO1A2_CHICK | 981  | NRGDPGPVGPVGP | -1 | training |
| CO1A2_CHICK | 984  | DPGPVGPVGPAGA | -1 | training |
| CO1A2_CHICK | 987  | PVGPVGPAGAFGP | -1 | training |
| CO1A2_CHICK | 993  | PAGAFGPRGLAGP | -1 | training |
| CO1A2_CHICK | 999  | PRGLAGPQGPRGE | -1 | training |
| CO1A2_CHICK | 1002 | LAGPQGPRGEKGE | -1 | training |
| CO1A2_CHICK | 1009 | RGEKGEPGDKGHR | -1 | training |
| CO1A2_CHICK | 1018 | KGHRGLPGLKGHN | -1 | training |
| CO1A2_CHICK | 1030 | NGLQGLPGLAGQH | -1 | training |
| CO1A2_CHICK | 1041 | QHGDQGPPGNNGP | -1 | training |
| CO1A2_CHICK | 1042 | HGDQGPPGNNGPA | -1 | training |
| CO1A2_CHICK | 1047 | PPGNNGPAGPRGP | -1 | training |
| CO1A2_CHICK | 1050 | NNGPAGPRGPPGP | -1 | training |
| CO1A2_CHICK | 1053 | PAGPRGPPGPSGP | -1 | training |
| CO1A2_CHICK | 1054 | AGPRGPPGPSGPP | -1 | training |
| CO1A2_CHICK | 1056 | PRGPPGPSGPPGK | -1 | training |
| CO1A2_CHICK | 1059 | PPGPSGPPGKDGR | -1 | training |
| CO1A2_CHICK | 1060 | PGPSGPPGKDGRN | -1 | training |
| CO1A2_CHICK | 1069 | DGRNGLPGPIGPA | -1 | training |
| CO1A2_CHICK | 1071 | RNGLPGPIGPAV  | -1 | training |
| CO1A2_CHICK | 1074 | LPGPIGPAVVRGS | -1 | training |
| CO1A2_CHICK | 1086 | SHGSQGPAGPPGP | -1 | training |
| CO1A2_CHICK | 1089 | SQGPAGPPGPPGP | -1 | training |
| CO1A2_CHICK | 1090 | QGPAGPPGPPGPP | -1 | training |
| CO1A2_CHICK | 1092 | PAGPPGPPGPPGP | -1 | training |
| CO1A2_CHICK | 1093 | AGPPGPPGPPGPP | -1 | training |
| CO1A2_CHICK | 1096 | PGPPGPPGPPGPN | -1 | training |
| CO1A2_CHICK | 1098 | PPGPPGPPGPNNG | -1 | training |
| CO1A2_CHICK | 1099 | PGPPGPPGPNNGG | -1 | training |
| CO1A2_CHICK | 1101 | PPGPPGPNNGGGE | -1 | training |
| CO1A2_CHICK | 1120 | YYRADQPSLRPKD | -1 | training |
| CO1A2_CHICK | 1124 | DQPSLRPKDYVD  | -1 | training |
| CO1A2_CHICK | 1146 | IETLLTPEGSKKN | -1 | training |
| CO1A2_CHICK | 1153 | EGSKKNPARTCRD | -1 | training |
| CO1A2_CHICK | 1165 | DLRLSHPEWSSGF | -1 | training |
| CO1A2_CHICK | 1176 | GFYWIDPNQGCTA | -1 | training |
| CO1A2_CHICK | 1206 | ASLEDIPTKTWYV | -1 | training |
| CO1A2_CHICK | 1216 | WYVSKNPKDKKHI | -1 | training |

|             |      |               |    |          |
|-------------|------|---------------|----|----------|
| CO1A2_CHICK | 1332 | EYRTNKPSRLPIL | -1 | training |
| CO1A2_CHICK | 1336 | NKPSRLPILDIAP | -1 | training |
| CO1A2_CHICK | 1342 | PILDIAPLDIGGA | -1 | training |
| CO1A2_CHICK | 1358 | FGLHIGPVCFKXX | -1 | training |
| CO1A2_MAMAE | 176  | IGSAGPPGFPGAP | 1  | training |
| CO1A2_MAMAE | 182  | PGFPGAPGPKGEI | 1  | training |
| CO1A2_MAMAE | 284  | SGSKGEPGSAGPQ | 1  | training |
| CO1A2_MAMAE | 293  | AGPQGPPGPSGEE | 1  | training |
| CO1A2_MAMAE | 410  | AGARGEPNIGFP  | 1  | training |
| CO1A2_MAMAE | 473  | QGPAGPPGFQGLP | 1  | training |
| CO1A2_MAMAE | 479  | PGFQGLPGPSGTA | 1  | training |
| CO1A2_MAMAE | 491  | AGEAGKPGERGIP | 1  | training |
| CO1A2_MAMAE | 497  | PGERGIPGEFGLP | 1  | training |
| CO1A2_MAMAE | 503  | PGEFGLPGPAGPR | 1  | training |
| CO1A2_MAMAE | 599  | DGARGAPGAVGAP | 1  | training |
| CO1A2_MAMAE | 605  | PGAVGAPGPAGAT | 1  | training |
| CO1A2_MAMAE | 704  | RGDGGPPGATGFP | 1  | training |
| CO1A2_MAMAE | 710  | PGATGFPGAAGRT | 1  | training |
| CO1A2_MAMAE | 728  | AGITGPPGPPGAA | 1  | training |
| CO1A2_MAMAE | 731  | TGPPGPPGAAGKE | 1  | training |
| CO1A2_MAMAE | 761  | TGASGPPGFAGEK | 1  | training |
| CO1A2_MAMAE | 806  | RGERGLPGVAGAV | 1  | training |
| CO1A2_MAMAE | 815  | AGAVGEPGPLGIA | 1  | training |
| CO1A2_MAMAE | 824  | LGIAGPPGARGPP | 1  | training |
| CO1A2_MAMAE | 902  | HGNRGEPPGAGSV | 1  | training |
| CO1A2_MAMAE | 11   | KGVGLGPGPMGLM | -1 | training |
| CO1A2_MAMAE | 13   | VGLGPGPMGLMGP | -1 | training |
| CO1A2_MAMAE | 22   | LMGPRGPPGATGP | -1 | training |
| CO1A2_MAMAE | 23   | MGPRGPPGATGPP | -1 | training |
| CO1A2_MAMAE | 28   | PPGATGPPGSPGF | -1 | training |
| CO1A2_MAMAE | 29   | PGATGPPGSPGFQ | -1 | training |
| CO1A2_MAMAE | 32   | TGPPGSPGFQGPP | -1 | training |
| CO1A2_MAMAE | 37   | SPGFQPPGEPGE  | -1 | training |
| CO1A2_MAMAE | 38   | PGFQPPGEPGEP  | -1 | training |
| CO1A2_MAMAE | 41   | QGPPGEPGEPGQT | -1 | training |
| CO1A2_MAMAE | 44   | PGEPGEPGQTGPA | -1 | training |
| CO1A2_MAMAE | 49   | EPGQTGPAGSRGP | -1 | training |
| CO1A2_MAMAE | 55   | PAGSRGPAGPPGK | -1 | training |
| CO1A2_MAMAE | 58   | SRGPAGPPGKAGE | -1 | training |
| CO1A2_MAMAE | 59   | RGPAGPPGKAGED | -1 | training |
| CO1A2_MAMAE | 74   | PGKPGRPGERGVV | -1 | training |
| CO1A2_MAMAE | 82   | ERGVVGPQGARGF | -1 | training |
| CO1A2_MAMAE | 89   | QGARGFPGTPGLP | -1 | training |

|             |     |               |    |          |
|-------------|-----|---------------|----|----------|
| CO1A2_MAMAE | 92  | RGFPGTPGLPGFK | -1 | training |
| CO1A2_MAMAE | 95  | PGTPGLPGFKGIR | -1 | training |
| CO1A2_MAMAE | 113 | DGLKGQPGAPGVK | -1 | training |
| CO1A2_MAMAE | 116 | KGQPGAPGVKGEP | -1 | training |
| CO1A2_MAMAE | 122 | PGVKGEPGAPGEN | -1 | training |
| CO1A2_MAMAE | 131 | PGENGTGQIGAR  | -1 | training |
| CO1A2_MAMAE | 140 | IGARGLPGERGRV | -1 | training |
| CO1A2_MAMAE | 149 | RGRVGGPGPAGAR | -1 | training |
| CO1A2_MAMAE | 151 | RVGGPGPAGARGS | -1 | training |
| CO1A2_MAMAE | 163 | SDGSVGPVGPAGP | -1 | training |
| CO1A2_MAMAE | 166 | SVGPVGPAGPIGS | -1 | training |
| CO1A2_MAMAE | 169 | PVGPAGPIGSAGP | -1 | training |
| CO1A2_MAMAE | 175 | PIGSAGPPGFPGA | -1 | training |
| CO1A2_MAMAE | 179 | AGPPGFPGAPGPK | -1 | training |
| CO1A2_MAMAE | 184 | FPGAPGPKGEIGP | -1 | training |
| CO1A2_MAMAE | 190 | PKGEIGPVGNPGP | -1 | training |
| CO1A2_MAMAE | 194 | IGPVGNPGPSGPA | -1 | training |
| CO1A2_MAMAE | 196 | PVGNPGPSGPAGP | -1 | training |
| CO1A2_MAMAE | 199 | NPGPSGPAGPRGE | -1 | training |
| CO1A2_MAMAE | 202 | PSGPAGPRGEAGL | -1 | training |
| CO1A2_MAMAE | 209 | RGEAGLPGVSGPV | -1 | training |
| CO1A2_MAMAE | 214 | LPGVSGPVGPPGN | -1 | training |
| CO1A2_MAMAE | 217 | VSGPVGPPGNPGA | -1 | training |
| CO1A2_MAMAE | 221 | VGPPGNPGANGLA | -1 | training |
| CO1A2_MAMAE | 251 | PGPRGIPGPVGAA | -1 | training |
| CO1A2_MAMAE | 253 | PRGIPGPVGAAGA | -1 | training |
| CO1A2_MAMAE | 269 | RGIVGEPGPAGSK | -1 | training |
| CO1A2_MAMAE | 271 | IVGEPGPAGSKGE | -1 | training |
| CO1A2_MAMAE | 289 | EPGSAGPQGPPGP | -1 | training |
| CO1A2_MAMAE | 292 | SAGPQGPPGPSGE | -1 | training |
| CO1A2_MAMAE | 295 | PQGPPGPSGEEGK | -1 | training |
| CO1A2_MAMAE | 304 | EEGKRGPNGEAGS | -1 | training |
| CO1A2_MAMAE | 313 | EAGSAGPAGPPGL | -1 | training |
| CO1A2_MAMAE | 316 | SAGPAGPPGLRGG | -1 | training |
| CO1A2_MAMAE | 317 | AGPAGPPGLRGGP | -1 | training |
| CO1A2_MAMAE | 323 | PGLRGGPGSRGLP | -1 | training |
| CO1A2_MAMAE | 340 | RAGVMGPPGSRGA | -1 | training |
| CO1A2_MAMAE | 341 | AGVMGPPGSRGAS | -1 | training |
| CO1A2_MAMAE | 349 | SRGASGPAGVRGP | -1 | training |
| CO1A2_MAMAE | 355 | PAGVRGPGSDSGR | -1 | training |
| CO1A2_MAMAE | 362 | SGDSGRPGEPGVM | -1 | training |
| CO1A2_MAMAE | 365 | SGRPGEPGVMGPR | -1 | training |
| CO1A2_MAMAE | 370 | EPGVMGPRGLPGS | -1 | training |

|             |     |               |    |          |
|-------------|-----|---------------|----|----------|
| CO1A2_MAMAE | 374 | MGPRGLPGSPGNV | -1 | training |
| CO1A2_MAMAE | 377 | RGLPGSPGNVGPA | -1 | training |
| CO1A2_MAMAE | 382 | SPGNVGPAGKEGP | -1 | training |
| CO1A2_MAMAE | 388 | PAGKEGPAGLPGI | -1 | training |
| CO1A2_MAMAE | 392 | EGPAGLPIDGRP  | -1 | training |
| CO1A2_MAMAE | 398 | PGIDGRPGPIGPA | -1 | training |
| CO1A2_MAMAE | 400 | IDGRPGPIGPAGA | -1 | training |
| CO1A2_MAMAE | 403 | RPGPIGPAGARGE | -1 | training |
| CO1A2_MAMAE | 416 | PGNIGFPGPKGPA | -1 | training |
| CO1A2_MAMAE | 418 | NIGFPGPKGPAGD | -1 | training |
| CO1A2_MAMAE | 421 | FPGPKGPAGDPGK | -1 | training |
| CO1A2_MAMAE | 425 | KGPAGDPGKNGDK | -1 | training |
| CO1A2_MAMAE | 439 | HAGLAGPRGAPGP | -1 | training |
| CO1A2_MAMAE | 443 | AGPRGAPGPDGNN | -1 | training |
| CO1A2_MAMAE | 445 | PRGAPGPDGNNGA | -1 | training |
| CO1A2_MAMAE | 454 | NNGAQGPPGLQGV | -1 | training |
| CO1A2_MAMAE | 455 | NGAQGPPGLQGVQ | -1 | training |
| CO1A2_MAMAE | 469 | GKGEQGPAGPPGF | -1 | training |
| CO1A2_MAMAE | 472 | EQGPAGPPGFQGL | -1 | training |
| CO1A2_MAMAE | 481 | FQGLPGPSGTAGE | -1 | training |
| CO1A2_MAMAE | 505 | EFGLPGPAGPRGE | -1 | training |
| CO1A2_MAMAE | 508 | LPGPAGPRGERGP | -1 | training |
| CO1A2_MAMAE | 514 | PRGERGPPGQSGA | -1 | training |
| CO1A2_MAMAE | 515 | RGERGPPGQSGAA | -1 | training |
| CO1A2_MAMAE | 523 | QSGAAGPTGPIGS | -1 | training |
| CO1A2_MAMAE | 526 | AAGPTGPIGSRGP | -1 | training |
| CO1A2_MAMAE | 545 | DGNKGEPGVVGAP | -1 | training |
| CO1A2_MAMAE | 551 | PGVVGAPGTAGPS | -1 | training |
| CO1A2_MAMAE | 556 | APGTAGPSGPVGL | -1 | training |
| CO1A2_MAMAE | 559 | TAGPSGPVGLPGE | -1 | training |
| CO1A2_MAMAE | 563 | SGPVGLPGERGAA | -1 | training |
| CO1A2_MAMAE | 572 | RGAAGIPGGKGEK | -1 | training |
| CO1A2_MAMAE | 607 | AVGAPGPAGATGD | -1 | training |
| CO1A2_MAMAE | 619 | DRGEAGPAGSAGP | -1 | training |
| CO1A2_MAMAE | 625 | PAGSAGPAGPRGS | -1 | training |
| CO1A2_MAMAE | 628 | SAGPAGPRGSPGE | -1 | training |
| CO1A2_MAMAE | 632 | AGPRGSPGERGEV | -1 | training |
| CO1A2_MAMAE | 640 | ERGEVGPAGPNGF | -1 | training |
| CO1A2_MAMAE | 643 | EVGPAGPNGFAGP | -1 | training |
| CO1A2_MAMAE | 649 | PNGFAGPAGAAGQ | -1 | training |
| CO1A2_MAMAE | 667 | ERGTKGPKGENGP | -1 | training |
| CO1A2_MAMAE | 673 | PKGENGVPVGTGP | -1 | training |
| CO1A2_MAMAE | 676 | ENGPVGTGPVGA  | -1 | training |

|             |     |                |    |          |
|-------------|-----|----------------|----|----------|
| CO1A2_MAMAE | 679 | PVGPTGPPVGAAGP | -1 | training |
| CO1A2_MAMAE | 685 | PVGAAGPAGPNGP  | -1 | training |
| CO1A2_MAMAE | 688 | AAGPAGPNGPPGP  | -1 | training |
| CO1A2_MAMAE | 691 | PAGPNGPPGPAGS  | -1 | training |
| CO1A2_MAMAE | 692 | AGPNGPPGPAGSR  | -1 | training |
| CO1A2_MAMAE | 694 | PNGPPGPAGSRGD  | -1 | training |
| CO1A2_MAMAE | 703 | SRGDGGPPGATGF  | -1 | training |
| CO1A2_MAMAE | 718 | AAGRTGPPGPAGI  | -1 | training |
| CO1A2_MAMAE | 719 | AGRTGPPGPAGIT  | -1 | training |
| CO1A2_MAMAE | 721 | RTGPPGPAGITGP  | -1 | training |
| CO1A2_MAMAE | 727 | PAGITGPPGPPGA  | -1 | training |
| CO1A2_MAMAE | 730 | ITGPPGPPGAAGK  | -1 | training |
| CO1A2_MAMAE | 742 | KEGLRGRGDQGP   | -1 | training |
| CO1A2_MAMAE | 748 | PRGDQGPVGRTE   | -1 | training |
| CO1A2_MAMAE | 760 | ETGASGPPGFAGE  | -1 | training |
| CO1A2_MAMAE | 773 | KGSSGEPGTAGPP  | -1 | training |
| CO1A2_MAMAE | 778 | EPGTAGPPGAPGP  | -1 | training |
| CO1A2_MAMAE | 779 | PGTAGPPGAPGPQ  | -1 | training |
| CO1A2_MAMAE | 782 | AGPPGAPGPQGIL  | -1 | training |
| CO1A2_MAMAE | 784 | PPGAPGPQGILGP  | -1 | training |
| CO1A2_MAMAE | 790 | PQGILGPPGILGL  | -1 | training |
| CO1A2_MAMAE | 791 | QGILGPPGILGLP  | -1 | training |
| CO1A2_MAMAE | 817 | AVGEPGPLGIAGP  | -1 | training |
| CO1A2_MAMAE | 823 | PLGIAGPPGARGP  | -1 | training |
| CO1A2_MAMAE | 829 | PPGARGPPGAVGS  | -1 | training |
| CO1A2_MAMAE | 830 | PGARGPPGAVGSP  | -1 | training |
| CO1A2_MAMAE | 836 | PGAVGSPGVNGAP  | -1 | training |
| CO1A2_MAMAE | 842 | PGVNGAPGEAGR   | -1 | training |
| CO1A2_MAMAE | 851 | AGRDGNPGSDGPP  | -1 | training |
| CO1A2_MAMAE | 856 | NPGSDGPPGRDGL  | -1 | training |
| CO1A2_MAMAE | 857 | PGSDGPPGRDGLP  | -1 | training |
| CO1A2_MAMAE | 863 | PGRDGLPGHKGER  | -1 | training |
| CO1A2_MAMAE | 872 | KGERGYPGNAGPV  | -1 | training |
| CO1A2_MAMAE | 877 | YPGNAGPVGTAGA  | -1 | training |
| CO1A2_MAMAE | 884 | VGTAGAPGPQGPL  | -1 | training |
| CO1A2_MAMAE | 886 | TAGAPGPQGPLGP  | -1 | training |
| CO1A2_MAMAE | 889 | APGPQGPLGPAGK  | -1 | training |
| CO1A2_MAMAE | 892 | PQGPLGPAGKHGN  | -1 | training |
| CO1A2_MAMAE | 904 | NRGEPGPAGSVGP  | -1 | training |
| CO1A2_MAMAE | 910 | PAGSVGPVGAVGP  | -1 | training |
| CO1A2_MAMAE | 916 | PVGAVGPRGPSGP  | -1 | training |
| CO1A2_MAMAE | 919 | AVGPRGPSGPQGA  | -1 | training |
| CO1A2_MAMAE | 922 | PRGPSGPQGARGD  | -1 | training |

|             |      |                |    |          |
|-------------|------|----------------|----|----------|
| CO1A2_MAMAE | 937  | EAGDKGPRGLPGF  | -1 | training |
| CO1A2_MAMAE | 941  | KGPRGLPGFKGHN  | -1 | training |
| CO1A2_MAMAE | 965  | HGDQGSPPSVGPA  | -1 | training |
| CO1A2_MAMAE | 970  | SPGSVGPAGPRGP  | -1 | training |
| CO1A2_MAMAE | 973  | SVGPAGPRGPAGP  | -1 | training |
| CO1A2_MAMAE | 976  | PAGPRGPAGPSGP  | -1 | training |
| CO1A2_MAMAE | 979  | PRGPAGPSGPVVK  | -1 | training |
| CO1A2_MAMAE | 982  | PAGPSGPVVKDGR  | -1 | training |
| CO1A2_MAMAE | 989  | VGKDGRPGHAGAV  | -1 | training |
| CO1A2_MAMAE | 997  | HAGAVGPAGVRGS  | -1 | training |
| CO1A2_MAMAE | 1009 | SQGSQGPSGPPGP  | -1 | training |
| CO1A2_MAMAE | 1012 | SQGPSGPPGPPGP  | -1 | training |
| CO1A2_MAMAE | 1013 | QGPSGPPGPPGPP  | -1 | training |
| CO1A2_MAMAE | 1015 | PSGPPGPPGPPGP  | -1 | training |
| CO1A2_MAMAE | 1019 | PGPPGPPGPPGPS  | -1 | training |
| CO1A2_MAMAE | 1021 | PPGPPGPPGPSGG  | -1 | training |
| CO1A2_MAMAE | 1022 | PGPPGPPGPSGGG  | -1 | training |
| CO1A2_MAMAE | 1024 | PPGPPGPSGGGYD  | -1 | training |
| CO27A_CONPE | 76   | CELYAFPSFGAXX  | 1  | training |
| CO27A_CONPE | 38   | FLSKRKPSAERWR  | -1 | training |
| CO2A1_MAMAE | 3    | XXXXGEPGGVGPI  | 1  | training |
| CO2A1_MAMAE | 12   | VGPIGPPGERGAP  | 1  | training |
| CO2A1_MAMAE | 336  | RGETGPPGPAGFA  | 1  | training |
| CO2A1_MAMAE | 414  | XXXVGPPGANGNP  | 1  | training |
| CO2A1_MAMAE | 420  | PGANGNPGPAGPP  | 1  | training |
| CO2A1_MAMAE | 426  | PGPAGPPGPAGKX  | 1  | training |
| CO2A1_MAMAE | 648  | TGLQGLPAPPPTS  | 1  | training |
| CO2A1_MAMAE | 8    | EPGGVGPPIPPGE  | -1 | training |
| CO2A1_MAMAE | 11   | GVGPIGPPGERGA  | -1 | training |
| CO2A1_MAMAE | 18   | PGERGAPGNRXXX  | -1 | training |
| CO2A1_MAMAE | 327  | XXXXGAPGERGET  | -1 | training |
| CO2A1_MAMAE | 335  | ERGETGPPGPAGF  | -1 | training |
| CO2A1_MAMAE | 338  | ETGPPGPAGFAGP  | -1 | training |
| CO2A1_MAMAE | 344  | PAGFAGPPGADGQ  | -1 | training |
| CO2A1_MAMAE | 351  | PGADGQPGAKXXX  | -1 | training |
| CO2A1_MAMAE | 413  | XXXXVGPPGANGN  | -1 | training |
| CO2A1_MAMAE | 422  | ANGNPGPAGPPGP  | -1 | training |
| CO2A1_MAMAE | 425  | NPGPAGPPGPAGK  | -1 | training |
| CO2A1_MAMAE | 428  | PAGPPGPAGKXXX  | -1 | training |
| CO2A1_MAMAE | 651  | QGLPAPPPTS GDQ | -1 | training |
| CO2A1_MAMAE | 662  | DQGASGPSGPAGP  | -1 | training |
| CO2A1_MAMAE | 665  | ASGPSGPAGPRXX  | -1 | training |
| CO2A1_MAMAE | 668  | PSGPAGPRXXXXXX | -1 | training |

|             |      |                 |    |          |
|-------------|------|-----------------|----|----------|
| CO6A_CONER  | 6    | XDDCIKPYGFCSL   | 1  | training |
| CO6A_CONER  | 13   | YGFCSLPILKNGL   | -1 | training |
| CO6A_CONNI  | 6    | XSKCFSPGTF CGI  | 1  | training |
| CO6A_CONNI  | 14   | TFCGIKPLCCSV    | 1  | training |
| CO6A_CONRA  | 4    | XXXCKPPGSPCRV   | 1  | training |
| CO6A_CONRA  | 7    | CKPPGSPCRVSSY   | 1  | training |
| CO6A_CONRA  | 3    | XXXXCKPPGSPCR   | -1 | training |
| CO6A3_HUMAN | 2100 | KGSRGFPGEKGEV   | 1  | training |
| CO6A3_HUMAN | 2206 | FGRRGPPGAKGNK   | 1  | training |
| CO6A3_HUMAN | 2239 | AGPAGPPGLIGE Q  | 1  | training |
| CO6A3_HUMAN | 2316 | KGERGFPGYPGPK   | 1  | training |
| CO6A3_HUMAN | 2319 | RGFPGYPGPKGNP   | 1  | training |
| CO6A3_HUMAN | 8    | RKHRHLPLVAVFC   | -1 | training |
| CO6A3_HUMAN | 21   | LFLSGFPTTHAQQ   | -1 | training |
| CO6A3_HUMAN | 87   | VQFNGNPHTEFLL   | -1 | training |
| CO6A3_HUMAN | 143  | RAGDGVPQVIVVL   | -1 | training |
| CO6A3_HUMAN | 161  | KDGLALPSAELKS   | -1 | training |
| CO6A3_HUMAN | 192  | KEIASEPLNMHMF   | -1 | training |
| CO6A3_HUMAN | 223  | VHSSVSPERAGDT   | -1 | training |
| CO6A3_HUMAN | 273  | NLLEKLP IGTQ QI | -1 | training |
| CO6A3_HUMAN | 290  | VQFSDEPRTMFSL   | -1 | training |
| CO6A3_HUMAN | 347  | RVEEGVPQVLVLI   | -1 | training |
| CO6A3_HUMAN | 357  | VLISAGPSSDEIR   | -1 | training |
| CO6A3_HUMAN | 403  | NLVFTVPEFRSFG   | -1 | training |
| CO6A3_HUMAN | 417  | LQEKLLPYIVGVA   | -1 | training |
| CO6A3_HUMAN | 431  | RHIVLKPPTIVTQ   | -1 | training |
| CO6A3_HUMAN | 432  | HIVLKPPTIVTQV   | -1 | training |
| CO6A3_HUMAN | 495  | YADTVRPEFYFNT   | -1 | training |
| CO6A3_HUMAN | 503  | FYFNTHPTKREVI   | -1 | training |
| CO6A3_HUMAN | 517  | AVRKMKPLDGSAL   | -1 | training |
| CO6A3_HUMAN | 550  | RAAEGIPKLLVLI   | -1 | training |
| CO6A3_HUMAN | 568  | LDEISQPAQELKR   | -1 | training |
| CO6A3_HUMAN | 605  | SSLVFIPAEFRAA   | -1 | training |
| CO6A3_HUMAN | 612  | AEFRAAPLQGMLP   | -1 | training |
| CO6A3_HUMAN | 618  | PLQGMLPGLLAPL   | -1 | training |
| CO6A3_HUMAN | 623  | LPGLLAPLRTL SG  | -1 | training |
| CO6A3_HUMAN | 631  | RTLSGTPEVHSNK   | -1 | training |
| CO6A3_HUMAN | 656  | VGKTNFPYVRDFV   | -1 | training |
| CO6A3_HUMAN | 687  | VQFSDTPVTEFSL   | -1 | training |
| CO6A3_HUMAN | 744  | RIREHVPQLLLLL   | -1 | training |
| CO6A3_HUMAN | 793  | EQIAFNPSLVYLM   | -1 | training |
| CO6A3_HUMAN | 806  | DDFSSLPALPQQL   | -1 | training |
| CO6A3_HUMAN | 809  | SSLPALPQQLIQP   | -1 | training |



|             |      |               |    |          |
|-------------|------|---------------|----|----------|
| CO6A3_HUMAN | 815  | PQQLIQPLTTYVS | -1 | training |
| CO6A3_HUMAN | 828  | GGVEEVPLAQPES | -1 | training |
| CO6A3_HUMAN | 832  | EVPLAQPEKRDI  | -1 | training |
| CO6A3_HUMAN | 853  | NLVGQFPVVRDFL | -1 | training |
| CO6A3_HUMAN | 870  | DELNVKPEGTRIA | -1 | training |
| CO6A3_HUMAN | 897  | DEHQSKPEILNLV | -1 | training |
| CO6A3_HUMAN | 959  | SDRVDGPASNLKQ | -1 | training |
| CO6A3_HUMAN | 970  | KQSGVVPFIFQAK | -1 | training |
| CO6A3_HUMAN | 980  | QAKNADPAELEQI | -1 | training |
| CO6A3_HUMAN | 990  | EQIVLSPAFILAA | -1 | training |
| CO6A3_HUMAN | 1000 | LAAESLPKIGDLH | -1 | training |
| CO6A3_HUMAN | 1007 | KIGDLHPQIVNLL | -1 | training |
| CO6A3_HUMAN | 1021 | SVHNGAPAPVSGE | -1 | training |
| CO6A3_HUMAN | 1023 | HNGAPAPVSGEKD | -1 | training |
| CO6A3_HUMAN | 1045 | GVRSGFPLLKEFV | -1 | training |
| CO6A3_HUMAN | 1078 | YSDRTRPEFYLS  | -1 | training |
| CO6A3_HUMAN | 1104 | LTLGGPTPNTGA  | -1 | training |
| CO6A3_HUMAN | 1106 | LLGGPTPNTGAAL | -1 | training |
| CO6A3_HUMAN | 1133 | RITEGVPQLLIVL | -1 | training |
| CO6A3_HUMAN | 1151 | GDDVRNPSVVVKR | -1 | training |
| CO6A3_HUMAN | 1162 | KRGGAVPIGIGIG | -1 | training |
| CO6A3_HUMAN | 1182 | QTISFIPDFAVAI | -1 | training |
| CO6A3_HUMAN | 1189 | DFAVAIPTFRQLG | -1 | training |
| CO6A3_HUMAN | 1218 | ELSRLQPVLQPLP | -1 | training |
| CO6A3_HUMAN | 1222 | LQPVLQPLSPGV  | -1 | training |
| CO6A3_HUMAN | 1224 | PVLQPLSPGVGG  | -1 | training |
| CO6A3_HUMAN | 1226 | LQPLSPGVGGKR  | -1 | training |
| CO6A3_HUMAN | 1246 | GSQSAGPEFYVVR | -1 | training |
| CO6A3_HUMAN | 1280 | IQFSDDPKVEFLL | -1 | training |
| CO6A3_HUMAN | 1304 | AVQRLRPKGGRQI | -1 | training |
| CO6A3_HUMAN | 1327 | RNIFKRPLGSRIE | -1 | training |
| CO6A3_HUMAN | 1337 | RIEEGVPQFLVLI | -1 | training |
| CO6A3_HUMAN | 1355 | DDEVDDPAVELKQ | -1 | training |
| CO6A3_HUMAN | 1366 | KQFGVAPFTIARN | -1 | training |
| CO6A3_HUMAN | 1385 | VKISLSPEYVFSV | -1 | training |
| CO6A3_HUMAN | 1398 | STFRELPSEQLK  | -1 | training |
| CO6A3_HUMAN | 1407 | EQKLLTPITLTS  | -1 | training |
| CO6A3_HUMAN | 1426 | LASTRYPPPAVES | -1 | training |
| CO6A3_HUMAN | 1427 | ASTRYPPPAVESD | -1 | training |
| CO6A3_HUMAN | 1428 | STRYPPPAVESDA | -1 | training |
| CO6A3_HUMAN | 1449 | SSEGVRPDGFahi | -1 | training |
| CO6A3_HUMAN | 1470 | RRLNIGPSKVRVG | -1 | training |
| CO6A3_HUMAN | 1486 | FSNDVFPEFYLKT | -1 | training |

|             |      |                |    |          |
|-------------|------|----------------|----|----------|
| CO6A3_HUMAN | 1498 | TYRSQAPVLDAIR  | -1 | training |
| CO6A3_HUMAN | 1513 | RLRGGSPLNTGKA  | -1 | training |
| CO6A3_HUMAN | 1541 | RIEDGVPQHLLV   | -1 | training |
| CO6A3_HUMAN | 1590 | QTITNDPRLVFTV  | -1 | training |
| CO6A3_HUMAN | 1603 | REFRELPNIEERI  | -1 | training |
| CO6A3_HUMAN | 1615 | IMNSFGPSAATPA  | -1 | training |
| CO6A3_HUMAN | 1620 | GPSAATPAPPGVD  | -1 | training |
| CO6A3_HUMAN | 1622 | SAATPAPPGVDTP  | -1 | training |
| CO6A3_HUMAN | 1623 | AATPAPPGVDTPP  | -1 | training |
| CO6A3_HUMAN | 1628 | PPGVDTPPPSRPE  | -1 | training |
| CO6A3_HUMAN | 1629 | PGVDTPPPSRPEK  | -1 | training |
| CO6A3_HUMAN | 1630 | GVDTPPPSRPEKK  | -1 | training |
| CO6A3_HUMAN | 1633 | TPPPSRPEKKKAD  | -1 | training |
| CO6A3_HUMAN | 1687 | VQYNSDPTDEFFL  | -1 | training |
| CO6A3_HUMAN | 1733 | RVNHFVPEAGSRL  | -1 | training |
| CO6A3_HUMAN | 1744 | RLDQRVPQIAFVI  | -1 | training |
| CO6A3_HUMAN | 1826 | MHETLCPGVTDAA  | -1 | training |
| CO6A3_HUMAN | 1883 | CSGGRSPTVRVSV  | -1 | training |
| CO6A3_HUMAN | 1894 | SVVANTPSGPVEA  | -1 | training |
| CO6A3_HUMAN | 1897 | ANTPSGPVEAFDF  | -1 | training |
| CO6A3_HUMAN | 1908 | DFDEYQPEMLEKF  | -1 | training |
| CO6A3_HUMAN | 1922 | NMRSQHYPVLTED  | -1 | training |
| CO6A3_HUMAN | 1942 | KFRQSSPDSVKVV  | -1 | training |
| CO6A3_HUMAN | 2005 | GFMYDRPLRLNLL  | -1 | training |
| CO6A3_HUMAN | 2033 | KACCGVPCKCSGQ  | -1 | training |
| CO6A3_HUMAN | 2045 | QRGDRGPIGSIGP  | -1 | training |
| CO6A3_HUMAN | 2051 | PIGSIGPKGIPGE  | -1 | training |
| CO6A3_HUMAN | 2055 | IGPKGIPGEDGYR  | -1 | training |
| CO6A3_HUMAN | 2064 | DGYRGYPGDEGGP  | -1 | training |
| CO6A3_HUMAN | 2070 | PGDEGGPGERGPP  | -1 | training |
| CO6A3_HUMAN | 2075 | GPGERGPPGVNGT  | -1 | training |
| CO6A3_HUMAN | 2076 | PGERGPPGVNGTQ  | -1 | training |
| CO6A3_HUMAN | 2088 | QGFQGCPCQRGVK  | -1 | training |
| CO6A3_HUMAN | 2124 | DGDKGLPGSSGEK  | -1 | training |
| CO6A3_HUMAN | 2133 | SGEKGNPGRRGDK  | -1 | training |
| CO6A3_HUMAN | 2141 | RRGDKGPRGEKGE  | -1 | training |
| CO6A3_HUMAN | 2157 | VGIRGDPGNPGQD  | -1 | training |
| CO6A3_HUMAN | 2160 | RGDPGNPGQDSQE  | -1 | training |
| CO6A3_HUMAN | 2169 | DSQERGPKGETGD  | -1 | training |
| CO6A3_HUMAN | 2178 | ETGDLGPMGVPR   | -1 | training |
| CO6A3_HUMAN | 2182 | LGPMGVPRDGV    | -1 | training |
| CO6A3_HUMAN | 2188 | PGRDGVPPGGPGET | -1 | training |
| CO6A3_HUMAN | 2191 | DGVPPGGPGETGKN | -1 | training |

|             |      |                |    |          |
|-------------|------|----------------|----|----------|
| CO6A3_HUMAN | 2205 | GFGRRGPPGAKGN  | -1 | training |
| CO6A3_HUMAN | 2215 | KGNKGGPGQPGFE  | -1 | training |
| CO6A3_HUMAN | 2218 | KGGPGQPGFEGEQ  | -1 | training |
| CO6A3_HUMAN | 2232 | TRGAQGPAGPAGP  | -1 | training |
| CO6A3_HUMAN | 2235 | AQGPAGPAGPPGL  | -1 | training |
| CO6A3_HUMAN | 2238 | PAGPAGPPGLIGE  | -1 | training |
| CO6A3_HUMAN | 2250 | EQGISGPRGSGGA  | -1 | training |
| CO6A3_HUMAN | 2260 | GGAAGAPGERGRT  | -1 | training |
| CO6A3_HUMAN | 2268 | ERGRTGPLGRKGE  | -1 | training |
| CO6A3_HUMAN | 2275 | LGRKGEPEGEPGPK | -1 | training |
| CO6A3_HUMAN | 2278 | KGEPGEPGPKGGI  | -1 | training |
| CO6A3_HUMAN | 2280 | EPGEPGPKGGIGN  | -1 | training |
| CO6A3_HUMAN | 2289 | GIGNRGPRGETGD  | -1 | training |
| CO6A3_HUMAN | 2321 | FPGYPGPKGNPGE  | -1 | training |
| CO6A3_HUMAN | 2325 | PGPKGNPGEPLN   | -1 | training |
| CO6A3_HUMAN | 2328 | KGNPGEPLNGTT   | -1 | training |
| CO6A3_HUMAN | 2336 | LNGTTGPKGIRGR  | -1 | training |
| CO6A3_HUMAN | 2348 | RRGNSGPPGIVGQ  | -1 | training |
| CO6A3_HUMAN | 2349 | RGNSGPPGIVGQK  | -1 | training |
| CO6A3_HUMAN | 2358 | VGQKGDPGYPGPA  | -1 | training |
| CO6A3_HUMAN | 2361 | KGDPGYPGPAGPK  | -1 | training |
| CO6A3_HUMAN | 2363 | DPGYPGPAGPKGN  | -1 | training |
| CO6A3_HUMAN | 2366 | YGPAGPKGNRGD   | -1 | training |
| CO6A3_HUMAN | 2388 | SIKDKCPCCYGPL  | -1 | training |
| CO6A3_HUMAN | 2393 | CPCCYGPLECPVF  | -1 | training |
| CO6A3_HUMAN | 2397 | YGPLECPVFPTEL  | -1 | training |
| CO6A3_HUMAN | 2400 | LECPVFPTELAFA  | -1 | training |
| CO6A3_HUMAN | 2440 | IAESNCPRGARVA  | -1 | training |
| CO6A3_HUMAN | 2519 | VFFSNTPTRAS PQ | -1 | training |
| CO6A3_HUMAN | 2524 | TPTRASPQLREAV  | -1 | training |
| CO6A3_HUMAN | 2540 | SDAGITPLFLTRQ  | -1 | training |
| CO6A3_HUMAN | 2569 | GHALVLPAGRDLT  | -1 | training |
| CO6A3_HUMAN | 2595 | DICNIDPSCGFGS  | -1 | training |
| CO6A3_HUMAN | 2604 | GFGSWRPSFRDRR  | -1 | training |
| CO6A3_HUMAN | 2653 | RQLDMSPDPKASQ  | -1 | training |
| CO6A3_HUMAN | 2655 | LDMSPDPKASQHF  | -1 | training |
| CO6A3_HUMAN | 2671 | AVVQHAPSESVDN  | -1 | training |
| CO6A3_HUMAN | 2681 | VDNASMPPVKVEF  | -1 | training |
| CO6A3_HUMAN | 2682 | DNASMPPVKVEFS  | -1 | training |
| CO6A3_HUMAN | 2731 | NVFESAPNPRDLK  | -1 | training |
| CO6A3_HUMAN | 2733 | FESAPNPRDLKIV  | -1 | training |
| CO6A3_HUMAN | 2748 | MLTGEVPEQQL EE | -1 | training |
| CO6A3_HUMAN | 2790 | YTFASEPNDVFFK  | -1 | training |

|             |      |               |    |          |
|-------------|------|---------------|----|----------|
| CO6A3_HUMAN | 2808 | TELNEEPLMRFGR | -1 | training |
| CO6A3_HUMAN | 2817 | RFGRLPSFVSSE  | -1 | training |
| CO6A3_HUMAN | 2830 | NAFYLSPDIRKQC | -1 | training |
| CO6A3_HUMAN | 2844 | WFQGDQPTKNLVK | -1 | training |
| CO6A3_HUMAN | 2859 | HKQVNVPNNTSS  | -1 | training |
| CO6A3_HUMAN | 2866 | NNVTSSPTSNPVT | -1 | training |
| CO6A3_HUMAN | 2870 | SSPTSNPVTTTKP | -1 | training |
| CO6A3_HUMAN | 2876 | PVTTTKPVTTTKP | -1 | training |
| CO6A3_HUMAN | 2882 | PVTTTKPVTTTK  | -1 | training |
| CO6A3_HUMAN | 2889 | VTTTTKPVTTTTK | -1 | training |
| CO6A3_HUMAN | 2896 | VTTTTKPVTIINQ | -1 | training |
| CO6A3_HUMAN | 2903 | VTIINQPSVKPAA | -1 | training |
| CO6A3_HUMAN | 2907 | NQPSVKPAAAKPA | -1 | training |
| CO6A3_HUMAN | 2912 | KPAAAKPAPAKPV | -1 | training |
| CO6A3_HUMAN | 2914 | AAAKPAPAKPVAA | -1 | training |
| CO6A3_HUMAN | 2917 | KPAPAKPVAAPV  | -1 | training |
| CO6A3_HUMAN | 2922 | KPVAAKPVATKMA | -1 | training |
| CO6A3_HUMAN | 2932 | KMATVRPPVAVKP | -1 | training |
| CO6A3_HUMAN | 2933 | MATVRPPVAVKPA | -1 | training |
| CO6A3_HUMAN | 2938 | PPVAVKPATAAKP | -1 | training |
| CO6A3_HUMAN | 2944 | PATAAKPVAAKPA | -1 | training |
| CO6A3_HUMAN | 2949 | KPVAAKPAAVRPP | -1 | training |
| CO6A3_HUMAN | 2954 | KPAAVRPPAAAAA | -1 | training |
| CO6A3_HUMAN | 2955 | PAAVRPPAAAAAK | -1 | training |
| CO6A3_HUMAN | 2962 | AAAAAKPVATKPE | -1 | training |
| CO6A3_HUMAN | 2967 | KPVATKPEVPRPQ | -1 | training |
| CO6A3_HUMAN | 2970 | ATKPEVPRPQAAK | -1 | training |
| CO6A3_HUMAN | 2972 | KPEVPRPQAAKPA | -1 | training |
| CO6A3_HUMAN | 2977 | RPQAAKPAATKPA | -1 | training |
| CO6A3_HUMAN | 2982 | KPAATKPAATKPM | -1 | training |
| CO6A3_HUMAN | 2987 | KPATTKPMVKMSR | -1 | training |
| CO6A3_HUMAN | 3014 | HWERAEPGPYFY  | -1 | training |
| CO6A3_HUMAN | 3015 | WERAEPGPYFYD  | -1 | training |
| CO6A3_HUMAN | 3017 | RAEPGPYFYDLT  | -1 | training |
| CO6A3_HUMAN | 3081 | STKKSQPPPPQPA | -1 | training |
| CO6A3_HUMAN | 3082 | TKKSQPPPPQPAR | -1 | training |
| CO6A3_HUMAN | 3083 | KKSQPPPPQPARS | -1 | training |
| CO6A3_HUMAN | 3084 | KSQPPPPQPARS  | -1 | training |
| CO6A3_HUMAN | 3086 | QPPPPQPARSASS | -1 | training |
| CO6A3_HUMAN | 3103 | LMVSTEPLALTET | -1 | training |
| CO6A3_HUMAN | 3115 | TDICKLPKDEGTC | -1 | training |
| CO6A3_HUMAN | 3132 | LKWYYDPNTKSCA | -1 | training |
| CO6A3_HUMAN | 3164 | CEKVCAPVLAKPG | -1 | training |

|             |      |                |    |          |
|-------------|------|----------------|----|----------|
| CO6A3_HUMAN | 3169 | APVLAKPGVISVM  | -1 | training |
| CO6B_CONCN  | 6    | XDECFSPGTFCGT  | 1  | training |
| CO6B_CONCN  | 14   | TFCGTKPGLCCSA  | 1  | training |
| CO6B_CONPI  | 6    | XFGSFIPCAHKGE  | 1  | training |
| CO6B_CONPI  | 13   | CAHKGEPCTICCR  | 1  | training |
| CO6B_CONPI  | 20   | CTICCRPLRCHEE  | 1  | training |
| CO6B_CONPI  | 29   | CHEEKTPTCVXXX  | 1  | training |
| CO6C_CONCN  | 6    | XDECFSPGTFCGI  | 1  | training |
| CO6D_CONCN  | 6    | XDECFSPGTFCGF  | 1  | training |
| CO6D_CONCN  | 14   | TFCGFKPGLCCSA  | 1  | training |
| CO6D_CONPI  | 5    | XXYGNFPTCSETG  | 1  | training |
| CO7A_CONCN  | 7    | CKGKGAPCTRLMY  | 1  | training |
| CO7A_CONDE  | 4    | XXXACKPKNNLCA  | 1  | training |
| CO7A1_HUMAN | 2167 | AGPEGKPGQLQGPR | 1  | training |
| CO7A1_HUMAN | 2176 | QGPRGPPGPVGGH  | 1  | training |
| CO7A1_HUMAN | 2185 | VGGHGDPPGGAP   | 1  | training |
| CO7A1_HUMAN | 2188 | HGDPPGGAPGLA   | 1  | training |
| CO7A1_HUMAN | 2664 | KGEMGEPGVPGQS  | 1  | training |
| CO7A1_HUMAN | 2667 | MGEPGVPGQSGAP  | 1  | training |
| CO7A1_HUMAN | 2673 | PGQSGAPGKEGLI  | 1  | training |
| CO7A1_HUMAN | 19   | GILAEAPRVRAQH  | -1 | training |
| CO7A1_HUMAN | 67   | LEGLVLPFSGAAS  | -1 | training |
| CO7A1_HUMAN | 88   | VQYSDDPRTEFGL  | -1 | training |
| CO7A1_HUMAN | 133  | ADHVFLPQLARPG  | -1 | training |
| CO7A1_HUMAN | 138  | LPQLARPGVPKVC  | -1 | training |
| CO7A1_HUMAN | 141  | LARPGVPKVCILI  | -1 | training |
| CO7A1_HUMAN | 180  | GIKNADPEELKRV  | -1 | training |
| CO7A1_HUMAN | 190  | KRVASQPTSDFFF  | -1 | training |
| CO7A1_HUMAN | 209  | ILRTLLPLVSRRV  | -1 | training |
| CO7A1_HUMAN | 223  | TTAGGVPTTRPPD  | -1 | training |
| CO7A1_HUMAN | 227  | GVPVTRPPDDSTS  | -1 | training |
| CO7A1_HUMAN | 228  | VPVTRPPDDSTSA  | -1 | training |
| CO7A1_HUMAN | 235  | DDSTSAPRDLVLS  | -1 | training |
| CO7A1_HUMAN | 243  | DLVLSEPSSQSLR  | -1 | training |
| CO7A1_HUMAN | 258  | WTAASGPVTGYKV  | -1 | training |
| CO7A1_HUMAN | 268  | YKVQYTPLTGLGQ  | -1 | training |
| CO7A1_HUMAN | 275  | LTGLGQPLPSEERQ | -1 | training |
| CO7A1_HUMAN | 277  | GLGQPLPSEERQEV | -1 | training |
| CO7A1_HUMAN | 286  | RQEVNVPAGETSV  | -1 | training |
| CO7A1_HUMAN | 299  | RLRGLRPLTEYQV  | -1 | training |
| CO7A1_HUMAN | 331  | TTALEGPELTIQN  | -1 | training |
| CO7A1_HUMAN | 351  | VAWRSVPGATGYR  | -1 | training |
| CO7A1_HUMAN | 367  | RVLSGGPTQQQEL  | -1 | training |

|             |     |                |    |          |
|-------------|-----|----------------|----|----------|
| CO7A1_HUMAN | 375 | QQQELGPGQGSVL  | -1 | training |
| CO7A1_HUMAN | 387 | LLRDLEPGTDYEV  | -1 | training |
| CO7A1_HUMAN | 405 | FGRSVGPATSLMA  | -1 | training |
| CO7A1_HUMAN | 423 | VEQTLRPVILGPT  | -1 | training |
| CO7A1_HUMAN | 428 | RPVILGPTSILLS  | -1 | training |
| CO7A1_HUMAN | 439 | LSWNLVPEARGYR  | -1 | training |
| CO7A1_HUMAN | 456 | RETGLEPPQKVVL  | -1 | training |
| CO7A1_HUMAN | 457 | ETGLEPPQKVVLP  | -1 | training |
| CO7A1_HUMAN | 463 | PQKVVLPSDVTRY  | -1 | training |
| CO7A1_HUMAN | 476 | QLDGLQPGTEYRL  | -1 | training |
| CO7A1_HUMAN | 496 | GHEVATPATVVPT  | -1 | training |
| CO7A1_HUMAN | 501 | TPATVVPTGPELP  | -1 | training |
| CO7A1_HUMAN | 504 | TVVPTGPELPVSP  | -1 | training |
| CO7A1_HUMAN | 507 | PTGPELPVSPVTD  | -1 | training |
| CO7A1_HUMAN | 510 | PELPVSPVTDLQA  | -1 | training |
| CO7A1_HUMAN | 520 | LQATELPGQVRV   | -1 | training |
| CO7A1_HUMAN | 530 | VRVSWSPVPGATQ  | -1 | training |
| CO7A1_HUMAN | 532 | VSWSPVPGATQYR  | -1 | training |
| CO7A1_HUMAN | 554 | ERTLVLPQSQTAF  | -1 | training |
| CO7A1_HUMAN | 581 | VSARVGPREGSAS  | -1 | training |
| CO7A1_HUMAN | 595 | LTVRREPETPLAV  | -1 | training |
| CO7A1_HUMAN | 598 | RREPETPLAVPGL  | -1 | training |
| CO7A1_HUMAN | 602 | ETPLAVPGLRVVV  | -1 | training |
| CO7A1_HUMAN | 620 | VRVAWGVPVPGASG | -1 | training |
| CO7A1_HUMAN | 622 | VAWGVPVPGASGFR | -1 | training |
| CO7A1_HUMAN | 637 | WSTGSGPESSQTL  | -1 | training |
| CO7A1_HUMAN | 644 | ESSQTLPPDSTAT  | -1 | training |
| CO7A1_HUMAN | 645 | SSQTLPPDSTATD  | -1 | training |
| CO7A1_HUMAN | 657 | DITGLQPGTTYQV  | -1 | training |
| CO7A1_HUMAN | 675 | RGREEGPAAVIVA  | -1 | training |
| CO7A1_HUMAN | 685 | IVARTDPLGPVRT  | -1 | training |
| CO7A1_HUMAN | 688 | RTDPLGPVRTVHV  | -1 | training |
| CO7A1_HUMAN | 710 | ITWTRVPGATGYR  | -1 | training |
| CO7A1_HUMAN | 725 | WNSAHGPEKSQLV  | -1 | training |
| CO7A1_HUMAN | 745 | ELDGLEPDTEYTV  | -1 | training |
| CO7A1_HUMAN | 763 | VAGVDGPPASVVV  | -1 | training |
| CO7A1_HUMAN | 764 | AGVDGPPASVVVR  | -1 | training |
| CO7A1_HUMAN | 773 | VVVRTAPEPVGRV  | -1 | training |
| CO7A1_HUMAN | 775 | VRTAPEPVGRVSR  | -1 | training |
| CO7A1_HUMAN | 816 | GRSEGGPMRHQIL  | -1 | training |
| CO7A1_HUMAN | 823 | MRHQILPGNTDSA  | -1 | training |
| CO7A1_HUMAN | 855 | GDREGTPVSIVVT  | -1 | training |
| CO7A1_HUMAN | 863 | SIVVTTPEAPPA   | -1 | training |

|             |      |               |    |          |
|-------------|------|---------------|----|----------|
| CO7A1_HUMAN | 864  | IVVTTTPEAPPAL | -1 | training |
| CO7A1_HUMAN | 867  | TTPPEAPPALGTL | -1 | training |
| CO7A1_HUMAN | 868  | TPPEAPPALGTLH | -1 | training |
| CO7A1_HUMAN | 889  | LRLRWEPVPRAQG | -1 | training |
| CO7A1_HUMAN | 891  | LRWEPVPRAQGFL | -1 | training |
| CO7A1_HUMAN | 902  | FLLHWQPEGGQEQ | -1 | training |
| CO7A1_HUMAN | 914  | QSRVLGPELSSYH | -1 | training |
| CO7A1_HUMAN | 926  | HLDGLEPATQYRV | -1 | training |
| CO7A1_HUMAN | 939  | RLSVLGPAGEGPS | -1 | training |
| CO7A1_HUMAN | 944  | GPAGEGPSAEVTA | -1 | training |
| CO7A1_HUMAN | 955  | TARTESPRVPSIE | -1 | training |
| CO7A1_HUMAN | 958  | TESPRVPSIELRV | -1 | training |
| CO7A1_HUMAN | 978  | VTLAWTPVSRASS | -1 | training |
| CO7A1_HUMAN | 991  | YILSWRPLRGPGQ | -1 | training |
| CO7A1_HUMAN | 995  | WRPLRGPGQEVPG | -1 | training |
| CO7A1_HUMAN | 1000 | GPGQEVPGSPQTL | -1 | training |
| CO7A1_HUMAN | 1003 | QEVPGSPQTLPGI | -1 | training |
| CO7A1_HUMAN | 1007 | GSPQTLPGISSSQ | -1 | training |
| CO7A1_HUMAN | 1020 | RVTGLEPGVSYIF | -1 | training |
| CO7A1_HUMAN | 1030 | YIFSLTPVLDGVR | -1 | training |
| CO7A1_HUMAN | 1038 | LDGVRGPEASVTQ | -1 | training |
| CO7A1_HUMAN | 1046 | ASVTQTPVCPRGL | -1 | training |
| CO7A1_HUMAN | 1049 | TQTPVCPRGLADV | -1 | training |
| CO7A1_HUMAN | 1059 | ADVVFLPHATQDN | -1 | training |
| CO7A1_HUMAN | 1085 | LVLALGPLGPQAV | -1 | training |
| CO7A1_HUMAN | 1088 | ALGPLGPQAVQVG | -1 | training |
| CO7A1_HUMAN | 1102 | LSYSHRPSPLFPL | -1 | training |
| CO7A1_HUMAN | 1104 | YSHRPSPLFPLNG | -1 | training |
| CO7A1_HUMAN | 1107 | RPSPLFPLNGSHD | -1 | training |
| CO7A1_HUMAN | 1125 | QRIRDMPYMDPSG | -1 | training |
| CO7A1_HUMAN | 1129 | DMPYMDPSGNNLG | -1 | training |
| CO7A1_HUMAN | 1148 | HRYMLAPDAPGRR | -1 | training |
| CO7A1_HUMAN | 1151 | MLAPDAPGRRQHV | -1 | training |
| CO7A1_HUMAN | 1158 | GRRQHVPGVMLL  | -1 | training |
| CO7A1_HUMAN | 1168 | VLLVDEPLRGDIF | -1 | training |
| CO7A1_HUMAN | 1176 | RGDIFSPIREAQA | -1 | training |
| CO7A1_HUMAN | 1197 | GMAGADPEQLRRL | -1 | training |
| CO7A1_HUMAN | 1205 | QLRRLAPGMDSVQ | -1 | training |
| CO7A1_HUMAN | 1220 | FAVDDGPSLDQAV | -1 | training |
| CO7A1_HUMAN | 1242 | ASFTTQPRPEPCP | -1 | training |
| CO7A1_HUMAN | 1244 | FTTQPRPEPCPVY | -1 | training |
| CO7A1_HUMAN | 1246 | TQPRPEPCPVYCP | -1 | training |
| CO7A1_HUMAN | 1248 | PRPEPCPVYCPKG | -1 | training |

|             |      |               |    |          |
|-------------|------|---------------|----|----------|
| CO7A1_HUMAN | 1252 | PCPVYCPKGQKGE | -1 | training |
| CO7A1_HUMAN | 1259 | KGQKGEPGEMGLR | -1 | training |
| CO7A1_HUMAN | 1270 | LRGQVGPDPGL   | -1 | training |
| CO7A1_HUMAN | 1271 | RGQVGPDPGLP   | -1 | training |
| CO7A1_HUMAN | 1274 | VGPPGDPGLPGRT | -1 | training |
| CO7A1_HUMAN | 1277 | PGDPGLPGRTGAP | -1 | training |
| CO7A1_HUMAN | 1283 | PGRTGAPGPQGP  | -1 | training |
| CO7A1_HUMAN | 1285 | RTGAPGPQPPGS  | -1 | training |
| CO7A1_HUMAN | 1288 | APGPQPPGSATA  | -1 | training |
| CO7A1_HUMAN | 1289 | PGPQPPGSATAK  | -1 | training |
| CO7A1_HUMAN | 1301 | KGERGFPGADGRP | -1 | training |
| CO7A1_HUMAN | 1307 | PGADGRPGSPGRA | -1 | training |
| CO7A1_HUMAN | 1310 | DGRPGSPGRAGNP | -1 | training |
| CO7A1_HUMAN | 1316 | PGRAGNPOTPAP  | -1 | training |
| CO7A1_HUMAN | 1319 | AGNPOTPAPGLK  | -1 | training |
| CO7A1_HUMAN | 1322 | POTPAPGLKGP   | -1 | training |
| CO7A1_HUMAN | 1328 | PGLKGPGLPGPR  | -1 | training |
| CO7A1_HUMAN | 1331 | KGSPGLPGPRGDP | -1 | training |
| CO7A1_HUMAN | 1333 | SPGLPGPRGDPGE | -1 | training |
| CO7A1_HUMAN | 1337 | PGPRGDPGERGPR | -1 | training |
| CO7A1_HUMAN | 1342 | DPGERGPRGPKGE | -1 | training |
| CO7A1_HUMAN | 1345 | ERGPGRPKEPGA  | -1 | training |
| CO7A1_HUMAN | 1349 | RGPKGEPGAPGQV | -1 | training |
| CO7A1_HUMAN | 1352 | KGEPGAPGQVIGG | -1 | training |
| CO7A1_HUMAN | 1361 | VIGGEGPGLPGRK | -1 | training |
| CO7A1_HUMAN | 1364 | GEGPGLPGRKGDP | -1 | training |
| CO7A1_HUMAN | 1370 | PGRKGDGPGSGPP | -1 | training |
| CO7A1_HUMAN | 1372 | RKGDGPGSGPPGP | -1 | training |
| CO7A1_HUMAN | 1375 | DPGSGPPGPRGP  | -1 | training |
| CO7A1_HUMAN | 1376 | PGSGPPGPRGPL  | -1 | training |
| CO7A1_HUMAN | 1378 | PSGPPGPRGPLGD | -1 | training |
| CO7A1_HUMAN | 1381 | PPGPRGPLGDGP  | -1 | training |
| CO7A1_HUMAN | 1385 | RGPLGDGPRGPP  | -1 | training |
| CO7A1_HUMAN | 1387 | PLGDGPRGPPGL  | -1 | training |
| CO7A1_HUMAN | 1390 | DPGPRGPPGLPGT | -1 | training |
| CO7A1_HUMAN | 1391 | PGPRGPPGLPGTA | -1 | training |
| CO7A1_HUMAN | 1394 | RGPPGLPGTAMKG | -1 | training |
| CO7A1_HUMAN | 1410 | DRGERGPPGPEG  | -1 | training |
| CO7A1_HUMAN | 1411 | RGERGPPGPEGG  | -1 | training |
| CO7A1_HUMAN | 1413 | ERGPPEGGEGGIA | -1 | training |
| CO7A1_HUMAN | 1420 | GEGGIAPGEPGLP | -1 | training |
| CO7A1_HUMAN | 1423 | GIAPGEPGLPGLP | -1 | training |
| CO7A1_HUMAN | 1426 | PGEPGLPGLPGSP | -1 | training |



|             |      |                |    |          |
|-------------|------|----------------|----|----------|
| CO7A1_HUMAN | 1429 | PGLPGLPGSPGPQ  | -1 | training |
| CO7A1_HUMAN | 1432 | PGLPGSPGPQGPV  | -1 | training |
| CO7A1_HUMAN | 1434 | LPGSPGPQGPVGP  | -1 | training |
| CO7A1_HUMAN | 1437 | SPGPQGPVGPVGGK | -1 | training |
| CO7A1_HUMAN | 1440 | PQGPVGPVGGKKE  | -1 | training |
| CO7A1_HUMAN | 1441 | QGPVGPVGGKKEK  | -1 | training |
| CO7A1_HUMAN | 1455 | DSEDGAPGLPGQP  | -1 | training |
| CO7A1_HUMAN | 1458 | DGAPGLPGQPGSP  | -1 | training |
| CO7A1_HUMAN | 1461 | PGLPGQPGSPGEQ  | -1 | training |
| CO7A1_HUMAN | 1464 | PGQPGSPGEQGPR  | -1 | training |
| CO7A1_HUMAN | 1469 | SPGEQGPRGPPGA  | -1 | training |
| CO7A1_HUMAN | 1472 | EQGPRGPPGAIGP  | -1 | training |
| CO7A1_HUMAN | 1473 | QGPRGPPGAIGPK  | -1 | training |
| CO7A1_HUMAN | 1478 | PPGAIGPKGDRGF  | -1 | training |
| CO7A1_HUMAN | 1485 | KGDRGFPGPLGEA  | -1 | training |
| CO7A1_HUMAN | 1487 | DRGFPGPLGEAGE  | -1 | training |
| CO7A1_HUMAN | 1499 | EKGERGPPGPAGS  | -1 | training |
| CO7A1_HUMAN | 1500 | KGERGPPGPAGSR  | -1 | training |
| CO7A1_HUMAN | 1502 | ERGPPGPAGSRGL  | -1 | training |
| CO7A1_HUMAN | 1509 | AGSRGLPGVAGRP  | -1 | training |
| CO7A1_HUMAN | 1515 | PGVAGRPGAKGPE  | -1 | training |
| CO7A1_HUMAN | 1520 | RPGAKGPEGPPGP  | -1 | training |
| CO7A1_HUMAN | 1523 | AKGPEGPPGPTGR  | -1 | training |
| CO7A1_HUMAN | 1524 | KGPEGPPGPTGRQ  | -1 | training |
| CO7A1_HUMAN | 1526 | PEGPPGPTGRQGE  | -1 | training |
| CO7A1_HUMAN | 1536 | QGEKGEPGRPGDP  | -1 | training |
| CO7A1_HUMAN | 1539 | KGEPGRPGDPAVV  | -1 | training |
| CO7A1_HUMAN | 1542 | PGRPGDPAVVGPA  | -1 | training |
| CO7A1_HUMAN | 1547 | DPAVVGPAVAGPK  | -1 | training |
| CO7A1_HUMAN | 1552 | GPAVAGPKGEKGD  | -1 | training |
| CO7A1_HUMAN | 1561 | EKGDVGPAGPRGA  | -1 | training |
| CO7A1_HUMAN | 1564 | DVGPAGPRGATGV  | -1 | training |
| CO7A1_HUMAN | 1576 | VQGERGPPGLVLP  | -1 | training |
| CO7A1_HUMAN | 1577 | QGERGPPGLVLP   | -1 | training |
| CO7A1_HUMAN | 1582 | PPGLVLPGDGPK   | -1 | training |
| CO7A1_HUMAN | 1585 | LVLPGDGPDKGDP  | -1 | training |
| CO7A1_HUMAN | 1587 | LPGDGPDKGDPGD  | -1 | training |
| CO7A1_HUMAN | 1591 | PGPKGDGDRGPI   | -1 | training |
| CO7A1_HUMAN | 1596 | DPGDRGPIGLTGR  | -1 | training |
| CO7A1_HUMAN | 1605 | LTGRAGPPGDSGP  | -1 | training |
| CO7A1_HUMAN | 1606 | TGRAGPPGDSGPP  | -1 | training |
| CO7A1_HUMAN | 1611 | PPGDSGPPGEKGD  | -1 | training |
| CO7A1_HUMAN | 1612 | PGDSGPPGEKGD   | -1 | training |

|             |      |                |    |          |
|-------------|------|----------------|----|----------|
| CO7A1_HUMAN | 1618 | PGEKGDPRPGPP   | -1 | training |
| CO7A1_HUMAN | 1621 | KGDPGRPGPPGPV  | -1 | training |
| CO7A1_HUMAN | 1623 | DPGRPGPPGPVGP  | -1 | training |
| CO7A1_HUMAN | 1624 | PGRPGPPGPVGP   | -1 | training |
| CO7A1_HUMAN | 1626 | RPGPPGPVGPGR   | -1 | training |
| CO7A1_HUMAN | 1629 | PPGPVGPGRDGE   | -1 | training |
| CO7A1_HUMAN | 1644 | EKGDEGPPGDPGL  | -1 | training |
| CO7A1_HUMAN | 1645 | KGDEGPPGDPGLP  | -1 | training |
| CO7A1_HUMAN | 1648 | EGPPGDPGLPGKA  | -1 | training |
| CO7A1_HUMAN | 1651 | PGDPGLPGKAGER  | -1 | training |
| CO7A1_HUMAN | 1663 | RGLRGAPGVRGPV  | -1 | training |
| CO7A1_HUMAN | 1668 | APGVRGPVGEKGD  | -1 | training |
| CO7A1_HUMAN | 1678 | KGDQGDPEGEDGRN | -1 | training |
| CO7A1_HUMAN | 1687 | DGRNGSPGSSGPK  | -1 | training |
| CO7A1_HUMAN | 1692 | SPGSSGPKGDRGE  | -1 | training |
| CO7A1_HUMAN | 1699 | KGDRGEPGPPGPP  | -1 | training |
| CO7A1_HUMAN | 1701 | DRGEPGPPGPPGR  | -1 | training |
| CO7A1_HUMAN | 1702 | RGEPGPPGPPGRL  | -1 | training |
| CO7A1_HUMAN | 1704 | EPGPPGPPGRLVD  | -1 | training |
| CO7A1_HUMAN | 1705 | PGPPGPPGRLVDT  | -1 | training |
| CO7A1_HUMAN | 1713 | RLVDTGPGAREKG  | -1 | training |
| CO7A1_HUMAN | 1721 | AREKGEPGDRGQE  | -1 | training |
| CO7A1_HUMAN | 1729 | DRGQEGPRGPKGD  | -1 | training |
| CO7A1_HUMAN | 1732 | QEGPRGPKGDPGL  | -1 | training |
| CO7A1_HUMAN | 1736 | RGPKGDPGLPGAP  | -1 | training |
| CO7A1_HUMAN | 1739 | KGDPGLPGAPGER  | -1 | training |
| CO7A1_HUMAN | 1742 | PGLPGAPGERGIE  | -1 | training |
| CO7A1_HUMAN | 1753 | IEGFRGPPGPQGD  | -1 | training |
| CO7A1_HUMAN | 1754 | EGFRGPPGPQGD   | -1 | training |
| CO7A1_HUMAN | 1756 | FRGPPGPQGD     | -1 | training |
| CO7A1_HUMAN | 1760 | PGPQGD         | -1 | training |
| CO7A1_HUMAN | 1765 | DPGVRGPAGEKGD  | -1 | training |
| CO7A1_HUMAN | 1774 | EKGDRGPPGLDGR  | -1 | training |
| CO7A1_HUMAN | 1775 | KGDRGPPGLDGRS  | -1 | training |
| CO7A1_HUMAN | 1787 | SGLDGKPGAAGPS  | -1 | training |
| CO7A1_HUMAN | 1792 | KPGAAGPSGPNGA  | -1 | training |
| CO7A1_HUMAN | 1795 | AAGPSGPNGAAGK  | -1 | training |
| CO7A1_HUMAN | 1805 | AGKAGDPGRDGLP  | -1 | training |
| CO7A1_HUMAN | 1811 | PGRDGLPGLRGEQ  | -1 | training |
| CO7A1_HUMAN | 1820 | RGEQGLPGPSGPP  | -1 | training |
| CO7A1_HUMAN | 1822 | EQGLPGPSGPPGL  | -1 | training |
| CO7A1_HUMAN | 1825 | LPGPSGPPGLPGK  | -1 | training |
| CO7A1_HUMAN | 1826 | PGPSGPPGLPGKP  | -1 | training |

|             |      |               |    |          |
|-------------|------|---------------|----|----------|
| CO7A1_HUMAN | 1829 | SGPPGLPGKPGED | -1 | training |
| CO7A1_HUMAN | 1832 | PGLPGKPGEDGKP | -1 | training |
| CO7A1_HUMAN | 1838 | PGEDGKPGLNKKN | -1 | training |
| CO7A1_HUMAN | 1847 | NGKNGEPGDPGED | -1 | training |
| CO7A1_HUMAN | 1850 | NGEPGDPGEDGRK | -1 | training |
| CO7A1_HUMAN | 1873 | REGRDGPKGERGA | -1 | training |
| CO7A1_HUMAN | 1880 | KGERGAPGILGPQ | -1 | training |
| CO7A1_HUMAN | 1885 | APGILGPQGPPGL | -1 | training |
| CO7A1_HUMAN | 1888 | ILGPQGPPGLPGP | -1 | training |
| CO7A1_HUMAN | 1889 | LGPQGPPGLPGPV | -1 | training |
| CO7A1_HUMAN | 1892 | QGPPGLPGPVGPP | -1 | training |
| CO7A1_HUMAN | 1894 | PPGLPGPVGPPGQ | -1 | training |
| CO7A1_HUMAN | 1897 | LPGPVGPPGQGF  | -1 | training |
| CO7A1_HUMAN | 1898 | PGPVGPPGQGFPG | -1 | training |
| CO7A1_HUMAN | 1903 | PPGQGFPGVPGGT | -1 | training |
| CO7A1_HUMAN | 1906 | QGFPVPGGTGPK  | -1 | training |
| CO7A1_HUMAN | 1911 | VPGGTGPKGDRGE | -1 | training |
| CO7A1_HUMAN | 1927 | KGEQGLPGERGLR | -1 | training |
| CO7A1_HUMAN | 1936 | RGLRGEPGSVNV  | -1 | training |
| CO7A1_HUMAN | 1940 | GEPGSVNVDRLL  | -1 | training |
| CO7A1_HUMAN | 1972 | SSGSFLVPERRR  | -1 | training |
| CO7A1_HUMAN | 1974 | GSFLVPERRRGP  | -1 | training |
| CO7A1_HUMAN | 1980 | PERRRGPKGDSGE | -1 | training |
| CO7A1_HUMAN | 1989 | DSGEQGPPGKEGP | -1 | training |
| CO7A1_HUMAN | 1990 | SGEQGPPGKEGPI | -1 | training |
| CO7A1_HUMAN | 1995 | PPGKEGPIGFPGE | -1 | training |
| CO7A1_HUMAN | 1999 | EGPIGFGERGLK  | -1 | training |
| CO7A1_HUMAN | 2011 | KGDRGDPGPQGPP | -1 | training |
| CO7A1_HUMAN | 2013 | DRGDGPQGPPGL  | -1 | training |
| CO7A1_HUMAN | 2016 | DPGPQGPPGLALG | -1 | training |
| CO7A1_HUMAN | 2017 | PGPQGPPGLALGE | -1 | training |
| CO7A1_HUMAN | 2026 | ALGERGPPGPSGL | -1 | training |
| CO7A1_HUMAN | 2027 | LGERGPPGPSGLA | -1 | training |
| CO7A1_HUMAN | 2029 | ERGPPGPSGLAGE | -1 | training |
| CO7A1_HUMAN | 2036 | SGLAGEPGKPGIP | -1 | training |
| CO7A1_HUMAN | 2039 | AGEPGKPGIPGLP | -1 | training |
| CO7A1_HUMAN | 2042 | PGKPGIPGLPGRA | -1 | training |
| CO7A1_HUMAN | 2045 | PGIPGLPGRAGGV | -1 | training |
| CO7A1_HUMAN | 2057 | VGEAGRPGERGER | -1 | training |
| CO7A1_HUMAN | 2077 | EQGRDGPPGLPGT | -1 | training |
| CO7A1_HUMAN | 2078 | QGRDGPPGLPGTP | -1 | training |
| CO7A1_HUMAN | 2081 | DGPPGLPGTPGPP | -1 | training |
| CO7A1_HUMAN | 2084 | PGLPGTPGPPGPP | -1 | training |

|             |      |                |    |          |
|-------------|------|----------------|----|----------|
| CO7A1_HUMAN | 2086 | LPGTPGPPGPPGP  | -1 | training |
| CO7A1_HUMAN | 2087 | PGTPGPPGPPGPK  | -1 | training |
| CO7A1_HUMAN | 2089 | TPGPPGPPGPKVS  | -1 | training |
| CO7A1_HUMAN | 2090 | PGPPGPPGPKVSV  | -1 | training |
| CO7A1_HUMAN | 2092 | PPGPPGPKVSVDE  | -1 | training |
| CO7A1_HUMAN | 2099 | KVSVDEPGPLSG   | -1 | training |
| CO7A1_HUMAN | 2101 | SVDEPGPLSGEQ   | -1 | training |
| CO7A1_HUMAN | 2109 | LSGEQGPPGLKGA  | -1 | training |
| CO7A1_HUMAN | 2110 | SGEQGPPGLKGAK  | -1 | training |
| CO7A1_HUMAN | 2119 | KGAKGEPGSNGDQ  | -1 | training |
| CO7A1_HUMAN | 2127 | SNGDQGPKGDRGV  | -1 | training |
| CO7A1_HUMAN | 2134 | KGDRGVPGIKGDR  | -1 | training |
| CO7A1_HUMAN | 2143 | KGDRGEPGPRGQD  | -1 | training |
| CO7A1_HUMAN | 2145 | DRGEPGPRGQDGN  | -1 | training |
| CO7A1_HUMAN | 2152 | RGQDGNPGLPGER  | -1 | training |
| CO7A1_HUMAN | 2155 | DGNPGLPGERGMA  | -1 | training |
| CO7A1_HUMAN | 2163 | ERGMAGPEGKPGL  | -1 | training |
| CO7A1_HUMAN | 2172 | KPGLQGPRGPPGP  | -1 | training |
| CO7A1_HUMAN | 2175 | LQGPRGPPGPVGG  | -1 | training |
| CO7A1_HUMAN | 2178 | PRGPPGPVGGHGD  | -1 | training |
| CO7A1_HUMAN | 2187 | GHGDPGPPGAPGL  | -1 | training |
| CO7A1_HUMAN | 2191 | PGPPGAPGLAGPA  | -1 | training |
| CO7A1_HUMAN | 2196 | APGLAGPAGPQGP  | -1 | training |
| CO7A1_HUMAN | 2199 | LAGPAGPQGPSGL  | -1 | training |
| CO7A1_HUMAN | 2202 | PAGPQGPSGLKGE  | -1 | training |
| CO7A1_HUMAN | 2209 | SGLKGEPGETGPP  | -1 | training |
| CO7A1_HUMAN | 2214 | EPGETGPPGRGLT  | -1 | training |
| CO7A1_HUMAN | 2215 | PGETGPPGRGLTG  | -1 | training |
| CO7A1_HUMAN | 2222 | GRGLTGPTGAVGL  | -1 | training |
| CO7A1_HUMAN | 2229 | TGAVGLPGLPPGPS | -1 | training |
| CO7A1_HUMAN | 2231 | AVGLPGLPPGPSGL | -1 | training |
| CO7A1_HUMAN | 2232 | VGLPGLPPGPSGLV | -1 | training |
| CO7A1_HUMAN | 2234 | LPGPPGPSGLVGP  | -1 | training |
| CO7A1_HUMAN | 2240 | PSGLVGPQGSPGL  | -1 | training |
| CO7A1_HUMAN | 2244 | VGPQGSPGLPGQV  | -1 | training |
| CO7A1_HUMAN | 2247 | QGSPGLPGQVGET  | -1 | training |
| CO7A1_HUMAN | 2256 | VGETGKPGAPGRD  | -1 | training |
| CO7A1_HUMAN | 2259 | TGKPGAPGRDGAS  | -1 | training |
| CO7A1_HUMAN | 2274 | DGDRGSPGVPGSP  | -1 | training |
| CO7A1_HUMAN | 2277 | RGSPGVPGSPGLP  | -1 | training |
| CO7A1_HUMAN | 2280 | PGVPGSPGLPGPV  | -1 | training |
| CO7A1_HUMAN | 2283 | PGSPGLPGPVGPK  | -1 | training |
| CO7A1_HUMAN | 2285 | SPGLPGPVGPKGE  | -1 | training |

|             |      |                |    |          |
|-------------|------|----------------|----|----------|
| CO7A1_HUMAN | 2288 | LPGPVGPKEGEPGP | -1 | training |
| CO7A1_HUMAN | 2292 | VGPKGEPGPTGAP  | -1 | training |
| CO7A1_HUMAN | 2294 | PKGEPGPTGAPGQ  | -1 | training |
| CO7A1_HUMAN | 2298 | PGPTGAPGQAVVG  | -1 | training |
| CO7A1_HUMAN | 2306 | QAVVGLPGAKGEK  | -1 | training |
| CO7A1_HUMAN | 2315 | KGKKGAPGGLAGD  | -1 | training |
| CO7A1_HUMAN | 2326 | GDLVGEPGAKGDR  | -1 | training |
| CO7A1_HUMAN | 2335 | KGDRGLPGRGEK   | -1 | training |
| CO7A1_HUMAN | 2337 | DRGLPGRGEKGE   | -1 | training |
| CO7A1_HUMAN | 2350 | AGRAGEPGDPGED  | -1 | training |
| CO7A1_HUMAN | 2353 | AGEPGDPGEDGQK  | -1 | training |
| CO7A1_HUMAN | 2362 | DGQKGAPGPKGFK  | -1 | training |
| CO7A1_HUMAN | 2364 | QKGAPGPKGFKGD  | -1 | training |
| CO7A1_HUMAN | 2371 | KGFKGDPGVGVPG  | -1 | training |
| CO7A1_HUMAN | 2376 | DPGVGVPGSPGPP  | -1 | training |
| CO7A1_HUMAN | 2379 | VGVPSPGPPGPP   | -1 | training |
| CO7A1_HUMAN | 2381 | VPGSPGPPGPPGV  | -1 | training |
| CO7A1_HUMAN | 2382 | PGSPGPPGPPGVK  | -1 | training |
| CO7A1_HUMAN | 2384 | SPGPPGPPGVKGD  | -1 | training |
| CO7A1_HUMAN | 2385 | PGPPGPPGVKGDL  | -1 | training |
| CO7A1_HUMAN | 2394 | KGDLGLPGLPGAP  | -1 | training |
| CO7A1_HUMAN | 2397 | LGLPGLPGAPVV   | -1 | training |
| CO7A1_HUMAN | 2400 | PGLPGAPGVVGF   | -1 | training |
| CO7A1_HUMAN | 2406 | PGVVGFPGQTGPR  | -1 | training |
| CO7A1_HUMAN | 2411 | FPGQTGPRGEMGQ  | -1 | training |
| CO7A1_HUMAN | 2418 | RGEMGQPGPSGER  | -1 | training |
| CO7A1_HUMAN | 2420 | EMGQPGPSGERGL  | -1 | training |
| CO7A1_HUMAN | 2429 | ERGLAGPPGREGI  | -1 | training |
| CO7A1_HUMAN | 2430 | RGLAGPPGREGIP  | -1 | training |
| CO7A1_HUMAN | 2436 | PGREGIPGLGPP   | -1 | training |
| CO7A1_HUMAN | 2438 | REGIPGLGPPGP   | -1 | training |
| CO7A1_HUMAN | 2441 | IPGLGPPGPPGS   | -1 | training |
| CO7A1_HUMAN | 2442 | PGPLGPPGPPGSV  | -1 | training |
| CO7A1_HUMAN | 2444 | PLGPPGPPGSVGP  | -1 | training |
| CO7A1_HUMAN | 2445 | LGPPGPPGSVGPP  | -1 | training |
| CO7A1_HUMAN | 2450 | PPGSVGPPGASGL  | -1 | training |
| CO7A1_HUMAN | 2451 | PGSVGPPGASGLK  | -1 | training |
| CO7A1_HUMAN | 2463 | KGDKGDPGVGLPG  | -1 | training |
| CO7A1_HUMAN | 2468 | DPGVGLPGRGER   | -1 | training |
| CO7A1_HUMAN | 2470 | GVGLPGRGERGE   | -1 | training |
| CO7A1_HUMAN | 2477 | RGERGEPRGED    | -1 | training |
| CO7A1_HUMAN | 2486 | RGEDGRPGQEGPR  | -1 | training |
| CO7A1_HUMAN | 2491 | RPGQEGPRGLTGP  | -1 | training |

|             |      |               |    |          |
|-------------|------|---------------|----|----------|
| CO7A1_HUMAN | 2497 | PRGLTGPPGSRGE | -1 | training |
| CO7A1_HUMAN | 2498 | RGLTGPPGSRGER | -1 | training |
| CO7A1_HUMAN | 2528 | SAVILGPPGPRGA | -1 | training |
| CO7A1_HUMAN | 2529 | AVILGPPGPRGAK | -1 | training |
| CO7A1_HUMAN | 2531 | ILGPPGPRGAKGD | -1 | training |
| CO7A1_HUMAN | 2543 | DMGERGPRGLDGD | -1 | training |
| CO7A1_HUMAN | 2552 | LDGDKGPRGDNGD | -1 | training |
| CO7A1_HUMAN | 2559 | RGDNGDPGDKGSK | -1 | training |
| CO7A1_HUMAN | 2568 | KGSKGEPGDKGSA | -1 | training |
| CO7A1_HUMAN | 2577 | KGSAGLPGLRGLL | -1 | training |
| CO7A1_HUMAN | 2585 | LRGLLGPQGQPGA | -1 | training |
| CO7A1_HUMAN | 2589 | LGPQGQPGAAGIP | -1 | training |
| CO7A1_HUMAN | 2595 | PGAAGIPGDPGSP | -1 | training |
| CO7A1_HUMAN | 2598 | AGIPGDPGSPGKD | -1 | training |
| CO7A1_HUMAN | 2601 | PGDPGSPGKDGVP | -1 | training |
| CO7A1_HUMAN | 2607 | PGKDGVPGIRGEK | -1 | training |
| CO7A1_HUMAN | 2621 | DVGFMGPRGLKGE | -1 | training |
| CO7A1_HUMAN | 2648 | DKGEAGPPGRPGL | -1 | training |
| CO7A1_HUMAN | 2649 | KGEAGPPGRPGLA | -1 | training |
| CO7A1_HUMAN | 2652 | AGPPGRPGLAGHK | -1 | training |
| CO7A1_HUMAN | 2681 | KEGLIGPKGDRGF | -1 | training |
| CO7A1_HUMAN | 2691 | RGFDGQPGPKGDQ | -1 | training |
| CO7A1_HUMAN | 2693 | FDGQPGPKGDQGE | -1 | training |
| CO7A1_HUMAN | 2706 | KGERGTPGIGGFP | -1 | training |
| CO7A1_HUMAN | 2712 | PGIGGFPGPSGND | -1 | training |
| CO7A1_HUMAN | 2714 | IGGFPGPSGNDGS | -1 | training |
| CO7A1_HUMAN | 2723 | NDGSAGPPGPPGS | -1 | training |
| CO7A1_HUMAN | 2724 | DGSAGPPGPPGSV | -1 | training |
| CO7A1_HUMAN | 2726 | SAGPPGPPGSVGP | -1 | training |
| CO7A1_HUMAN | 2727 | AGPPGPPGSVGPR | -1 | training |
| CO7A1_HUMAN | 2732 | PPGSVGPRGPEGL | -1 | training |
| CO7A1_HUMAN | 2735 | SVGPRGPEGLQGQ | -1 | training |
| CO7A1_HUMAN | 2747 | QKGERGPPGERVV | -1 | training |
| CO7A1_HUMAN | 2748 | KGERGPPGERVVG | -1 | training |
| CO7A1_HUMAN | 2756 | ERVVGAPGVPGAP | -1 | training |
| CO7A1_HUMAN | 2759 | VGAPGVPGAPGER | -1 | training |
| CO7A1_HUMAN | 2762 | PGVPGAPGERGEQ | -1 | training |
| CO7A1_HUMAN | 2771 | RGEQGRPGPAGPR | -1 | training |
| CO7A1_HUMAN | 2773 | EQGRPGPAGPRGE | -1 | training |
| CO7A1_HUMAN | 2776 | RPGPAGPRGEKGE | -1 | training |
| CO7A1_HUMAN | 2815 | IASGSRPLPSYAA | -1 | training |
| CO7A1_HUMAN | 2817 | SGSRPLPSYAADT | -1 | training |
| CO7A1_HUMAN | 2832 | SQLHAVPVLRVSH | -1 | training |

|             |      |               |    |          |
|-------------|------|---------------|----|----------|
| CO7A1_HUMAN | 2846 | EEEERVPPEDDEY | -1 | training |
| CO7A1_HUMAN | 2847 | EEERVPPEDDEYS | -1 | training |
| CO7A1_HUMAN | 2866 | VEEYQDPEAPWDS | -1 | training |
| CO7A1_HUMAN | 2869 | YQDPEAPWDSDDP | -1 | training |
| CO7A1_HUMAN | 2875 | PWDSDDPCSLPLD | -1 | training |
| CO7A1_HUMAN | 2879 | DDPCSLPLDEGSC | -1 | training |
| CO7A1_HUMAN | 2906 | STEACHPFVYGGC | -1 | training |
| CO7A1_HUMAN | 2930 | ACERRCPPRVVQS | -1 | training |
| CO7A1_HUMAN | 2931 | CERRCPPRVVQSQ | -1 | training |
| CO7AB_CONGE | 4    | XXXCKSPGTPCSR | 1  | training |
| CO7AB_CONGE | 7    | CKSPGTPCSRGMR | 1  | training |
| CO7B_CONDE  | 4    | XXXDCIPGGEND  | 1  | training |
| CO7B_CONDE  | 14   | NCDVFRPYRCCSG | 1  | training |
| CO9A2_CHICK | 158  | PGKPGPPGHIQGV | 1  | training |
| CO9A2_CHICK | 178  | CPTNCPGPKGPQ  | 1  | training |
| CO9A2_CHICK | 6    | XMAHRSPALCLLL | -1 | training |
| CO9A2_CHICK | 26   | LAQLRGPPGEPGP | -1 | training |
| CO9A2_CHICK | 27   | AQLRGPPGEPGPR | -1 | training |
| CO9A2_CHICK | 30   | RGPPGEPGPRGPP | -1 | training |
| CO9A2_CHICK | 32   | PPGEPGPRGPPGP | -1 | training |
| CO9A2_CHICK | 35   | EPGPRGPPGPPGV | -1 | training |
| CO9A2_CHICK | 36   | PGPRGPPGPPGVP | -1 | training |
| CO9A2_CHICK | 38   | PRGPPGPPGVPGA | -1 | training |
| CO9A2_CHICK | 39   | RGPPGPPGVPGAD | -1 | training |
| CO9A2_CHICK | 42   | PGPPGVPGADGID | -1 | training |
| CO9A2_CHICK | 54   | DGDKGSPGAPGSP | -1 | training |
| CO9A2_CHICK | 57   | KGSPGAPGSPGAK | -1 | training |
| CO9A2_CHICK | 60   | PGAPGSPGAKGEP | -1 | training |
| CO9A2_CHICK | 66   | PGAKGEPGAPGPD | -1 | training |
| CO9A2_CHICK | 69   | KGEPGAPGPDGPP | -1 | training |
| CO9A2_CHICK | 71   | EPGAPGPDGPPGK | -1 | training |
| CO9A2_CHICK | 74   | APGPDGPPGKPGL | -1 | training |
| CO9A2_CHICK | 75   | PGPDGPPGKPGLD | -1 | training |
| CO9A2_CHICK | 78   | DGPPGKPGLDGLT | -1 | training |
| CO9A2_CHICK | 92   | AKGSRGPWGGQGL | -1 | training |
| CO9A2_CHICK | 102  | QGLKGQPLPGPP  | -1 | training |
| CO9A2_CHICK | 105  | KGQPLPGPPGLP  | -1 | training |
| CO9A2_CHICK | 107  | QPLPGPPGLPGP  | -1 | training |
| CO9A2_CHICK | 108  | PGLPGPPGLPGPS | -1 | training |
| CO9A2_CHICK | 111  | PGPPGLPGPSLPG | -1 | training |
| CO9A2_CHICK | 113  | PPGLPGPSLPGPP | -1 | training |
| CO9A2_CHICK | 116  | LPGPSLPGPPGLP | -1 | training |
| CO9A2_CHICK | 118  | GPSLPGPPGLPGQ | -1 | training |

|             |     |               |    |          |
|-------------|-----|---------------|----|----------|
| CO9A2_CHICK | 119 | PSLPGPPGLPGQV | -1 | training |
| CO9A2_CHICK | 122 | PGPPGLPGQVGLP | -1 | training |
| CO9A2_CHICK | 128 | PGQVGLPGEIGVP | -1 | training |
| CO9A2_CHICK | 134 | PGEIGVPGPKGDP | -1 | training |
| CO9A2_CHICK | 136 | EIGVPGPKGDGP  | -1 | training |
| CO9A2_CHICK | 140 | PGPKGDGPDGPR  | -1 | training |
| CO9A2_CHICK | 142 | PKGDGPDGPRGP  | -1 | training |
| CO9A2_CHICK | 145 | DPGPDGPRGPPGP | -1 | training |
| CO9A2_CHICK | 148 | PDGPRGPPGPPGK | -1 | training |
| CO9A2_CHICK | 149 | DGPRGPPGPPGKP | -1 | training |
| CO9A2_CHICK | 151 | PRGPPGPPGKPGP | -1 | training |
| CO9A2_CHICK | 152 | RGPPGPPGKPGPP | -1 | training |
| CO9A2_CHICK | 155 | PGPPGKPGPPGHI | -1 | training |
| CO9A2_CHICK | 157 | PPGKPGPPGHIQG | -1 | training |
| CO9A2_CHICK | 173 | SADFLCPTNCPPG | -1 | training |
| CO9A2_CHICK | 177 | LCPTNCPPGPKGP | -1 | training |
| CO9A2_CHICK | 180 | TNCPPGPKGPQGL | -1 | training |
| CO9A2_CHICK | 183 | PPGPKGPQGLQGL | -1 | training |
| CO9A2_CHICK | 196 | KGHRGRPGALGEP | -1 | training |
| CO9A2_CHICK | 202 | PGALGEPGQQGKQ | -1 | training |
| CO9A2_CHICK | 210 | QQGKQGPKGDVGV | -1 | training |
| CO9A2_CHICK | 223 | SGEQGVPGPPGPQ | -1 | training |
| CO9A2_CHICK | 225 | EQGVPGPPGPQQQ | -1 | training |
| CO9A2_CHICK | 226 | QGVPGPPGPQQQR | -1 | training |
| CO9A2_CHICK | 228 | VPGPPGPQQQRGY | -1 | training |
| CO9A2_CHICK | 235 | QQQRGYPGMAGPK | -1 | training |
| CO9A2_CHICK | 240 | YPMAGPKGETGP  | -1 | training |
| CO9A2_CHICK | 246 | PKGETGPAGYKGM | -1 | training |
| CO9A2_CHICK | 262 | IGAAGRPGREGPK | -1 | training |
| CO9A2_CHICK | 267 | RPGREGPKGPPGD | -1 | training |
| CO9A2_CHICK | 270 | REGPKGPPGDPGE | -1 | training |
| CO9A2_CHICK | 271 | EGPKGPPGDPGEK | -1 | training |
| CO9A2_CHICK | 274 | KGPPGDPGEKGEL | -1 | training |
| CO9A2_CHICK | 288 | GRGIRGPQGDIGP | -1 | training |
| CO9A2_CHICK | 294 | PQGDIGPKGDMGL | -1 | training |
| CO9A2_CHICK | 301 | KGDMGLPGIDGKD | -1 | training |
| CO9A2_CHICK | 310 | DGKDGTPGIPGVK | -1 | training |
| CO9A2_CHICK | 313 | DGTPGIPGVKGTA | -1 | training |
| CO9A2_CHICK | 322 | KGTAGQPGRPGPP | -1 | training |
| CO9A2_CHICK | 325 | AGQPGRPGPPGHR | -1 | training |
| CO9A2_CHICK | 327 | QPGRPGPPGHRGQ | -1 | training |
| CO9A2_CHICK | 328 | PGRPGPPGHRGQA | -1 | training |
| CO9A2_CHICK | 337 | RGQAGLPGQPFSK | -1 | training |



|             |     |                |    |          |
|-------------|-----|----------------|----|----------|
| CO9A2_CHICK | 340 | AGLPGQPGSKGGP  | -1 | training |
| CO9A2_CHICK | 346 | PGSKGGPGDKGEV  | -1 | training |
| CO9A2_CHICK | 364 | QGITGTPGLDGEP  | -1 | training |
| CO9A2_CHICK | 370 | PGLDGEPGPPGDA  | -1 | training |
| CO9A2_CHICK | 372 | LDGEPGPPGDAGT  | -1 | training |
| CO9A2_CHICK | 373 | DGEPGPPGDAGTA  | -1 | training |
| CO9A2_CHICK | 382 | AGTAGVPGLKGDR  | -1 | training |
| CO9A2_CHICK | 393 | DRGERGPVGAPGE  | -1 | training |
| CO9A2_CHICK | 397 | RGPVGAPGEAGQS  | -1 | training |
| CO9A2_CHICK | 405 | EAGQSGPKGEQGP  | -1 | training |
| CO9A2_CHICK | 411 | PKGEQGPPGIPGP  | -1 | training |
| CO9A2_CHICK | 412 | KGEQGPPGIPGPQ  | -1 | training |
| CO9A2_CHICK | 415 | QGPPGIPGPQGLP  | -1 | training |
| CO9A2_CHICK | 417 | PPGIPGPQGLPGV  | -1 | training |
| CO9A2_CHICK | 421 | PGPQGLPGVKGDK  | -1 | training |
| CO9A2_CHICK | 430 | KGDKGSPGKTGPK  | -1 | training |
| CO9A2_CHICK | 435 | SPGKTGPKGSTGD  | -1 | training |
| CO9A2_CHICK | 442 | KGSTGDPGVHGLA  | -1 | training |
| CO9A2_CHICK | 460 | KGESGEPGPKGQQ  | -1 | training |
| CO9A2_CHICK | 462 | ESGEPGPKGQQGI  | -1 | training |
| CO9A2_CHICK | 475 | QGELGFPPGSGDA  | -1 | training |
| CO9A2_CHICK | 477 | ELGFPPGSGDAGS  | -1 | training |
| CO9A2_CHICK | 484 | SGDAGSPGVRYYP  | -1 | training |
| CO9A2_CHICK | 490 | PGVRYYPGPPGPR  | -1 | training |
| CO9A2_CHICK | 492 | VRGYPPGPPRGL   | -1 | training |
| CO9A2_CHICK | 493 | RGYPGPPGPRGLL  | -1 | training |
| CO9A2_CHICK | 495 | YPPGPPGPRLLGE  | -1 | training |
| CO9A2_CHICK | 505 | LGERGVPGMPGQR  | -1 | training |
| CO9A2_CHICK | 508 | RGVPGMPGQRGVA  | -1 | training |
| CO9A2_CHICK | 555 | GVGAMGPPGPPGP  | -1 | training |
| CO9A2_CHICK | 556 | VGAMGPPGPPGPP  | -1 | training |
| CO9A2_CHICK | 558 | AMGPPGPPGPPGP  | -1 | training |
| CO9A2_CHICK | 559 | MGPPGPPGPPGPP  | -1 | training |
| CO9A2_CHICK | 561 | PPGPPGPPGPPGE  | -1 | training |
| CO9A2_CHICK | 562 | PGPPGPPGPPGEQ  | -1 | training |
| CO9A2_CHICK | 564 | PPGPPGPPGEQGL  | -1 | training |
| CO9A2_CHICK | 565 | PGPPGPPGEQGLH  | -1 | training |
| CO9A2_CHICK | 573 | EQGLHGPMGPRGV  | -1 | training |
| CO9A2_CHICK | 576 | LHGPMGPRGV PGL | -1 | training |
| CO9A2_CHICK | 580 | MGPRGV PGLLGAA | -1 | training |
| CO9A2_CHICK | 594 | QIGNIGPKGKRGE  | -1 | training |
| CO9A2_CHICK | 612 | DTGRGHPPGMPGPP | -1 | training |
| CO9A2_CHICK | 615 | RGHPGMPGPPGIP  | -1 | training |

|             |      |                |    |          |
|-------------|------|----------------|----|----------|
| CO9A2_CHICK | 617  | HPGMPGPPGIPGL  | -1 | training |
| CO9A2_CHICK | 618  | PGMPGPPGIPGLP  | -1 | training |
| CO9A2_CHICK | 621  | PGPPGIPGLPGIP  | -1 | training |
| CO9A2_CHICK | 624  | PGIPGLPGIPGHA  | -1 | training |
| CO9A2_CHICK | 627  | PGLPGIPGHALAG  | -1 | training |
| CO9A2_CHICK | 640  | KDGERGPPGVPGD  | -1 | training |
| CO9A2_CHICK | 641  | DGERGPPGVPGDA  | -1 | training |
| CO9A2_CHICK | 644  | RGPPGVPGDAGRP  | -1 | training |
| CO9A2_CHICK | 650  | PGDAGRPGSPGPA  | -1 | training |
| CO9A2_CHICK | 653  | AGRPGSPGPAGLP  | -1 | training |
| CO9A2_CHICK | 655  | RPGSPGPAGLPGF  | -1 | training |
| CO9A2_CHICK | 659  | PGPAGLPGFCEPA  | -1 | training |
| CO9A2_CHICK | 664  | LPGFCEPAACLGA  | -1 | training |
| CO9A2_CHICK | 672  | ACLGALPTPRHGX  | -1 | training |
| CO9A2_CHICK | 674  | LGALPTPRHGXXX  | -1 | training |
| COC1B_CONCL | 65   | WCDQDAPHGNCCD  | 1  | training |
| COEA1_HUMAN | 1467 | LGPAGPPGGPGLR  | 1  | training |
| COEA1_HUMAN | 1470 | AGPPGGPGLRGPK  | 1  | training |
| COEA1_HUMAN | 1482 | KGQQGEPGPKGPD  | 1  | training |
| COEA1_HUMAN | 1497 | RGEIGLPGPQGPP  | 1  | training |
| COEA1_HUMAN | 1503 | PGPQGGPPGPQGPS | 1  | training |
| COEA1_HUMAN | 1517 | LSIQGMPGMPGEK  | 1  | training |
| COEA1_HUMAN | 1520 | QGMPGMPGEKGEK  | 1  | training |
| COEA1_HUMAN | 1532 | KGDTGLPGPQGIP  | 1  | training |
| COEA1_HUMAN | 1538 | PGPQGIPGGVGS   | 1  | training |
| COEA1_HUMAN | 1544 | PGGVGSPGRDGSP  | 1  | training |
| COEA1_HUMAN | 1550 | PGRDGSPGQRGLP  | 1  | training |
| COEA1_HUMAN | 1556 | PGQRGLPGKDGSS  | 1  | training |
| COEA1_HUMAN | 1565 | DGSSGPPGPPGPI  | 1  | training |
| COEA1_HUMAN | 1568 | SGPPGPPGPIGIP  | 1  | training |
| COEA1_HUMAN | 1574 | PGPIGIPGTPGVP  | 1  | training |
| COEA1_HUMAN | 1577 | IGIPGTPGVPGIT  | 1  | training |
| COEA1_HUMAN | 1580 | PGTPGVPGITGSM  | 1  | training |
| COEA1_HUMAN | 1595 | QGALGPPGVPGAK  | 1  | training |
| COEA1_HUMAN | 1598 | LGPPGVPGAKGER  | 1  | training |
| COEA1_HUMAN | 1643 | AILNQIPSHSSI   | 1  | training |
| COEA1_HUMAN | 1656 | RTVQGPPGEPGRP  | 1  | training |
| COEA1_HUMAN | 1659 | QGPPGEPGRPGSP  | 1  | training |
| COEA1_HUMAN | 1662 | PGEPGRPGSPGAP  | 1  | training |
| COEA1_HUMAN | 1665 | PGRPGSPGAPGEQ  | 1  | training |
| COEA1_HUMAN | 1668 | PGSPGAPGEQGPP  | 1  | training |
| COEA1_HUMAN | 1674 | PGEQGGPPGTPGFP | 1  | training |
| COEA1_HUMAN | 1677 | QGPPGTPGFPGNA  | 1  | training |

|             |      |                |    |          |
|-------------|------|----------------|----|----------|
| COEA1_HUMAN | 1680 | PGTPGFPGNAGVP  | 1  | training |
| COEA1_HUMAN | 1686 | PGNAGVPGTPGER  | 1  | training |
| COEA1_HUMAN | 1689 | AGVPGTPGERGLT  | 1  | training |
| COEA1_HUMAN | 1704 | KGEKGNPGVGTQG  | 1  | training |
| COEA1_HUMAN | 1715 | QGPRGPPGPAGPS  | 1  | training |
| COEA1_HUMAN | 1726 | PSGESRPGSPGPP  | 1  | training |
| COEA1_HUMAN | 1729 | ESRPGSPGPPGSP  | 1  | training |
| COEA1_HUMAN | 1732 | PGSPGPPGSPGPR  | 1  | training |
| COEA1_HUMAN | 1735 | PGPPGSPGPRGPP  | 1  | training |
| COEA1_HUMAN | 1741 | PGPRGPPGHLGVP  | 1  | training |
| COEA1_HUMAN | 1747 | PGHLGVPGPQGGS  | 1  | training |
| COEA1_HUMAN | 1756 | QGPSGQPGYCDPS  | 1  | training |
| COEA1_HUMAN | 14   | MRYWLLPPFLAIV  | -1 | training |
| COEA1_HUMAN | 15   | RYWLLPPFLAIVY  | -1 | training |
| COEA1_HUMAN | 32   | VQGQVAPPTRLRY  | -1 | training |
| COEA1_HUMAN | 33   | QGQVAPPTRLRYN  | -1 | training |
| COEA1_HUMAN | 53   | QISWKAPRGKFGG  | -1 | training |
| COEA1_HUMAN | 66   | YKLLVTPTS GGKT | -1 | training |
| COEA1_HUMAN | 91   | IIQGLMPDQNYTV  | -1 | training |
| COEA1_HUMAN | 110  | KDKESKPAQGQFR  | -1 | training |
| COEA1_HUMAN | 126  | LEKRKDPKPRVKV  | -1 | training |
| COEA1_HUMAN | 128  | KRKDPKPRVKVVD  | -1 | training |
| COEA1_HUMAN | 141  | RGNGSRPSSPEEV  | -1 | training |
| COEA1_HUMAN | 144  | GSRPSSPEEVK FV | -1 | training |
| COEA1_HUMAN | 154  | KFVCQTPAIADIV  | -1 | training |
| COEA1_HUMAN | 206  | AQYSGDPRIEWHL  | -1 | training |
| COEA1_HUMAN | 229  | EAVRNLPYKGGNT  | -1 | training |
| COEA1_HUMAN | 251  | FEN SFKPEAGSRT | -1 | training |
| COEA1_HUMAN | 277  | SQDDIIPSRNLR   | -1 | training |
| COEA1_HUMAN | 278  | QDDIIPSRNLRE   | -1 | training |
| COEA1_HUMAN | 309  | QEIASEP DSTHVY | -1 | training |
| COEA1_HUMAN | 355  | AHAITGPPTELIT  | -1 | training |
| COEA1_HUMAN | 356  | HAITGPPTELITS  | -1 | training |
| COEA1_HUMAN | 377  | VNWTHAPGNVEKY  | -1 | training |
| COEA1_HUMAN | 389  | YRVVYYPTRGGKP  | -1 | training |
| COEA1_HUMAN | 395  | PTRGGKPDEVVVD  | -1 | training |
| COEA1_HUMAN | 444  | ETTLALPMASDLL  | -1 | training |
| COEA1_HUMAN | 467  | VKWDAVPGASGYL  | -1 | training |
| COEA1_HUMAN | 478  | YLILYAPLTEGLA  | -1 | training |
| COEA1_HUMAN | 506  | ELSGLLPNTEYTV  | -1 | training |
| COEA1_HUMAN | 525  | GEEASDPVTGQET  | -1 | training |
| COEA1_HUMAN | 537  | TTLALSPPRNLRI  | -1 | training |
| COEA1_HUMAN | 538  | TLALSPPRNL RIS | -1 | training |

|             |      |                |    |          |
|-------------|------|----------------|----|----------|
| COEA1_HUMAN | 557  | ARLTWDPTSRQIN  | -1 | training |
| COEA1_HUMAN | 584  | NEVEVDPITTFPL  | -1 | training |
| COEA1_HUMAN | 589  | DPITTFPLKGLTP  | -1 | training |
| COEA1_HUMAN | 595  | PLKGLTPLTEYTI  | -1 | training |
| COEA1_HUMAN | 614  | DEGQSEPLTGVFT  | -1 | training |
| COEA1_HUMAN | 625  | FTTEEVPAQQYLE  | -1 | training |
| COEA1_HUMAN | 646  | FRVTWHPLSADEG  | -1 | training |
| COEA1_HUMAN | 660  | HKLMWIPVYGGKT  | -1 | training |
| COEA1_HUMAN | 685  | VIEGLEPGTEYEV  | -1 | training |
| COEA1_HUMAN | 720  | DSFWTEPATTIVP  | -1 | training |
| COEA1_HUMAN | 726  | PATTIVPTTSVTS  | -1 | training |
| COEA1_HUMAN | 776  | MTAQGDPEEEVIG  | -1 | training |
| COEA1_HUMAN | 787  | IGTVMVPGSQNNL  | -1 | training |
| COEA1_HUMAN | 797  | NNLLLKPLLPDTE  | -1 | training |
| COEA1_HUMAN | 800  | LLKPLLPDTEYKV  | -1 | training |
| COEA1_HUMAN | 810  | YKVTVTPIYTDGE  | -1 | training |
| COEA1_HUMAN | 823  | GVSVSAPGKTLPS  | -1 | training |
| COEA1_HUMAN | 828  | APGKTLPSSGPQN  | -1 | training |
| COEA1_HUMAN | 832  | TLPSSGPQNLRS   | -1 | training |
| COEA1_HUMAN | 851  | LRITWDPSSPVK   | -1 | training |
| COEA1_HUMAN | 852  | RITWDPSSPVKG   | -1 | training |
| COEA1_HUMAN | 855  | WDPSSPVKGYRI   | -1 | training |
| COEA1_HUMAN | 865  | YRIVYKPVSVPGP  | -1 | training |
| COEA1_HUMAN | 869  | YKPVSVPGPTLET  | -1 | training |
| COEA1_HUMAN | 871  | PVSVPGPTLETFFV | -1 | training |
| COEA1_HUMAN | 979  | CFYGLQPDSEYKI  | -1 | training |
| COEA1_HUMAN | 997  | LQEIEGPSVSIME  | -1 | training |
| COEA1_HUMAN | 1009 | EKTQSLPTRPPTF  | -1 | training |
| COEA1_HUMAN | 1012 | QSLPTRPPTFPPT  | -1 | training |
| COEA1_HUMAN | 1013 | SLPTRPPTFPPTI  | -1 | training |
| COEA1_HUMAN | 1016 | TRPPTFPPTIPPA  | -1 | training |
| COEA1_HUMAN | 1017 | RPPTFPPTIPPAK  | -1 | training |
| COEA1_HUMAN | 1020 | TFPPTIPPAKEVC  | -1 | training |
| COEA1_HUMAN | 1021 | FPPTIPPAKEVCK  | -1 | training |
| COEA1_HUMAN | 1081 | VQFTDDPRTEFKL  | -1 | training |
| COEA1_HUMAN | 1135 | GTRRGIPKVIVVI  | -1 | training |
| COEA1_HUMAN | 1184 | VSIGSKPSARHVF  | -1 | training |
| COEA1_HUMAN | 1218 | TASATCPVVHKDG  | -1 | training |
| COEA1_HUMAN | 1253 | EGVSMEPGTFNVF  | -1 | training |
| COEA1_HUMAN | 1260 | GTFNVFPCYQLHK  | -1 | training |
| COEA1_HUMAN | 1273 | DALVSQPTRYLHP  | -1 | training |
| COEA1_HUMAN | 1279 | PTRYLHPEGLPSD  | -1 | training |
| COEA1_HUMAN | 1283 | LHPEGLPSDYTIS  | -1 | training |

|             |      |                |    |          |
|-------------|------|----------------|----|----------|
| COEA1_HUMAN | 1296 | FLFRILPDTQPQP  | -1 | training |
| COEA1_HUMAN | 1299 | RILPDTQPQEPFAL | -1 | training |
| COEA1_HUMAN | 1302 | PDTQPQEPFALWEI | -1 | training |
| COEA1_HUMAN | 1315 | LNKNSDPLVGVIL  | -1 | training |
| COEA1_HUMAN | 1347 | TVTFEGPEIRKIF  | -1 | training |
| COEA1_HUMAN | 1406 | MVRSRGGPGNSAP  | -1 | training |
| COEA1_HUMAN | 1412 | PGGNSAPFQLQMF  | -1 | training |
| COEA1_HUMAN | 1436 | DKCCELPGLRDDE  | -1 | training |
| COEA1_HUMAN | 1445 | RDDESCPDLPHSC  | -1 | training |
| COEA1_HUMAN | 1448 | ESCPDLPHSCSCS  | -1 | training |
| COEA1_HUMAN | 1463 | NEVALGPAGPPGG  | -1 | training |
| COEA1_HUMAN | 1466 | ALGPAGPPGGPGL  | -1 | training |
| COEA1_HUMAN | 1475 | GPGLRGPKGQQGE  | -1 | training |
| COEA1_HUMAN | 1484 | QQGEPGPKGPDGP  | -1 | training |
| COEA1_HUMAN | 1487 | EPGPKGPDGPRGE  | -1 | training |
| COEA1_HUMAN | 1490 | PKGPDGPRGEIGL  | -1 | training |
| COEA1_HUMAN | 1499 | EIGLPGPQGPPGP  | -1 | training |
| COEA1_HUMAN | 1502 | LPGPQGPPGPQGP  | -1 | training |
| COEA1_HUMAN | 1505 | PQGPPGPQGPSGL  | -1 | training |
| COEA1_HUMAN | 1508 | PPGPQGPSGLSIQ  | -1 | training |
| COEA1_HUMAN | 1534 | DTGLPGPQGIPGG  | -1 | training |
| COEA1_HUMAN | 1564 | KDGSSGPPGPPGP  | -1 | training |
| COEA1_HUMAN | 1567 | SSGPPGPPGPIGI  | -1 | training |
| COEA1_HUMAN | 1570 | PPGPPGPIGIPGT  | -1 | training |
| COEA1_HUMAN | 1588 | ITGSMGPQGALGP  | -1 | training |
| COEA1_HUMAN | 1594 | PQGALGPPGVPGA  | -1 | training |
| COEA1_HUMAN | 1655 | IRTVQGPPGEPGR  | -1 | training |
| COEA1_HUMAN | 1673 | APGEQGPPGTPGF  | -1 | training |
| COEA1_HUMAN | 1711 | GVGTQGPRGPPGP  | -1 | training |
| COEA1_HUMAN | 1714 | TQGPRGPPGPAGP  | -1 | training |
| COEA1_HUMAN | 1717 | PRGPPGPAGPSGE  | -1 | training |
| COEA1_HUMAN | 1720 | PPGPAGPSGESRP  | -1 | training |
| COEA1_HUMAN | 1731 | RPGSPGPPGSPGP  | -1 | training |
| COEA1_HUMAN | 1737 | PPGSPGPRGPPGH  | -1 | training |
| COEA1_HUMAN | 1740 | SPGPRGPPGHLGV  | -1 | training |
| COEA1_HUMAN | 1749 | HLGVPGPQGPSGQ  | -1 | training |
| COEA1_HUMAN | 1752 | VPGPQGPSGQPGY  | -1 | training |
| COEA1_HUMAN | 1761 | QPGYCDPSSCSAY  | -1 | training |
| COEA1_HUMAN | 1772 | AYGVRAPHPDQPE  | -1 | training |
| COEA1_HUMAN | 1774 | GVRAPHPDQPEFT  | -1 | training |
| COEA1_HUMAN | 1777 | APHPDQPEFTPVQ  | -1 | training |
| COEA1_HUMAN | 1781 | DQPEFTPVQDELE  | -1 | training |
| COEA1_HUMAN | 1794 | AMELWGPVXXXXX  | -1 | training |

|             |     |                |    |          |
|-------------|-----|----------------|----|----------|
| COG16_CONTE | 61  | LTTCLAPSECCSE  | 1  | training |
| COMA_CONMR  | 64  | YHAHPKPNFRTL   | 1  | training |
| COMA_CONMR  | 17  | IFLVLFPMATLQL  | -1 | training |
| COMA_CONMR  | 62  | WEYHAHPKPNFRT  | -1 | training |
| CONG_BOVIN  | 78  | AGRAGRPGWVGPI  | 1  | training |
| CONG_BOVIN  | 96  | NGFVGEPPGPKGDT | 1  | training |
| CONG_BOVIN  | 108 | TGPRGPPGMPGPA  | 1  | training |
| CONG_BOVIN  | 111 | RGPPGMPGPAGRE  | 1  | training |
| CONG_BOVIN  | 129 | QGSMGPPGTPGPK  | 1  | training |
| CONG_BOVIN  | 132 | MGPPGTPGPKGET  | 1  | training |
| CONG_BOVIN  | 147 | KGGVGAPGIQGF   | 1  | training |
| CONG_BOVIN  | 153 | PGIQGFPGPSGLK  | 1  | training |
| CONG_BOVIN  | 171 | PGETGAPGRAGVT  | 1  | training |
| CONG_BOVIN  | 195 | SGARGPPGLKGD   | 1  | training |
| CONG_BOVIN  | 5   | XXMLLLPLSVLL   | -1 | training |
| CONG_BOVIN  | 15  | LLLLTQPWRSLGA  | -1 | training |
| CONG_BOVIN  | 42  | TLVMCSPLESGLP  | -1 | training |
| CONG_BOVIN  | 48  | PLESGLPGHDGQD  | -1 | training |
| CONG_BOVIN  | 59  | QDGRECPHGEKGD  | -1 | training |
| CONG_BOVIN  | 66  | HGEKGDPGSPGPA  | -1 | training |
| CONG_BOVIN  | 69  | KGDPGSPGPAGRA  | -1 | training |
| CONG_BOVIN  | 71  | DPGSPGPAGRAGR  | -1 | training |
| CONG_BOVIN  | 83  | RPGWVGPIGPKGD  | -1 | training |
| CONG_BOVIN  | 86  | WVGPIGPKGDNGF  | -1 | training |
| CONG_BOVIN  | 98  | FVGEPPGPKGDTGP | -1 | training |
| CONG_BOVIN  | 104 | PKGDTGPRGPPGM  | -1 | training |
| CONG_BOVIN  | 107 | DTGPRGPPGMPGP  | -1 | training |
| CONG_BOVIN  | 113 | PPGMPGPAGREGP  | -1 | training |
| CONG_BOVIN  | 119 | PAGREGPSGKQGS  | -1 | training |
| CONG_BOVIN  | 128 | KQSMGPPGTPGP   | -1 | training |
| CONG_BOVIN  | 134 | PPGTPGPKGETGP  | -1 | training |
| CONG_BOVIN  | 140 | PKGETGPKGGVGA  | -1 | training |
| CONG_BOVIN  | 155 | IQGFPGPSGLKGE  | -1 | training |
| CONG_BOVIN  | 165 | KGEKGAPGETGAP  | -1 | training |
| CONG_BOVIN  | 179 | RAGVTGPSGAIGP  | -1 | training |
| CONG_BOVIN  | 185 | PSGAIGPQGPSGA  | -1 | training |
| CONG_BOVIN  | 188 | AIGPQGPSGARGP  | -1 | training |
| CONG_BOVIN  | 194 | PSGARGPPGLKGD  | -1 | training |
| CONG_BOVIN  | 204 | KGDRGDPGETGAK  | -1 | training |
| CONG_BOVIN  | 249 | KKAVLFPDQQAVG  | -1 | training |
| CONG_BOVIN  | 285 | KGQLASPRSSAEN  | -1 | training |
| CONG_BOVIN  | 321 | EGRFTYPTGEILV  | -1 | training |
| CONG_BOVIN  | 336 | NWADGEPNNSDEG  | -1 | training |

|             |     |               |    |          |
|-------------|-----|---------------|----|----------|
| CONG_BOVIN  | 344 | NSDEGQPENCVEI | -1 | training |
| CONG_BOVIN  | 352 | NCVEIFPDGKWND | -1 | training |
| CONG_BOVIN  | 360 | GKWNDVPCSKQLL | -1 | training |
| CONG7_ARAHY | 67  | GRDPYSPSQDPYS | 1  | training |
| CONG7_ARAHY | 74  | SQDPYSPSQDPDR | 1  | training |
| CONG7_ARAHY | 86  | RRDPYSPSPYDRR | 1  | training |
| CONG7_ARAHY | 44  | ERANLRPCEQHLM | -1 | training |
| CONG7_ARAHY | 64  | DSYGRDPYSPSQD | -1 | training |
| CONG7_ARAHY | 71  | YSPSQDPYSPSQD | -1 | training |
| CONG7_ARAHY | 78  | YSPSQDPDRDPY  | -1 | training |
| CONG7_ARAHY | 83  | DPDRDPYSPSPY  | -1 | training |
| CONG7_ARAHY | 88  | DPYSPSPYDRRGA | -1 | training |
| CONG7_ARAHY | 149 | RELRLNPQQCGLR | -1 | training |
| CONG7_ARAHY | 157 | QCGLRAPQRCDLE | -1 | training |
| CONO_CONGA  | 2   | XXXXXAPANSVWS | 1  | training |
| CONO_CONMU  | 2   | XXXXXSPANSVWS | 1  | training |
| CONOI_CONVL | 2   | XXXXXEPNSIWSX | 1  | training |
| CONOM_CONVL | 2   | XXXXXEPNSMWSX | 1  | training |
| COW_CONAA   | 3   | XXXXGCPWDPWCX | 1  | training |
| COW_CONAA   | 6   | XGCPWDPWCXXXX | -1 | training |
| COW_CONRA   | 57  | LRRSGCPWEPWCG | 1  | training |
| COW_CONRA   | 28  | QGDGDQPADRNAV | -1 | training |
| COW_CONRA   | 35  | ADRNAVPRDDNPG | -1 | training |
| COW_CONRA   | 40  | VPRDDNPGGASGK | -1 | training |
| COW_CONRA   | 60  | SGCPWEPWCGXXX | -1 | training |
| COW_CONSE   | 57  | LRRFGCPWQPWCG | 1  | training |
| COW_CONSE   | 28  | QGDADQPADRDAV | -1 | training |
| COW_CONSE   | 35  | ADRDAVPRDDNPS | -1 | training |
| COW_CONSE   | 40  | VPRDDNPSGTDGK | -1 | training |
| COW_CONSE   | 60  | FGCPWQPWCGXXX | -1 | training |
| CP2B_CONBE  | 13  | AYGESCPSSENTC | 1  | training |
| CPC_CUCSA   | 115 | NATVSMPPSSSP  | 1  | training |
| CPC_CUCSA   | 116 | ATVSMPPSSSPP  | 1  | training |
| CPC_CUCSA   | 117 | TVSMPPSSSPPS  | 1  | training |
| CPC_CUCSA   | 121 | PPSSSPPSSVMP  | 1  | training |
| CPC_CUCSA   | 122 | PPSSSPPSSVMPP | 1  | training |
| CPC_CUCSA   | 127 | PPSSVMPPPVMPP | 1  | training |
| CPC_CUCSA   | 128 | PSSVMPPPVMPPP | 1  | training |
| CPC_CUCSA   | 129 | SSVMPPPVMPPPS | 1  | training |
| CPC_CUCSA   | 133 | PPVMPPPSPSXXX | 1  | training |
| CPC_CUCSA   | 134 | PPVMPPPSPSXXX | 1  | training |
| CPC_CUCSA   | 136 | VMPPPSPSXXXXX | 1  | training |
| CPC_CUCSA   | 16  | NTGWSVPSSPNFY | -1 | training |

|             |     |                 |    |          |
|-------------|-----|-----------------|----|----------|
| CPC_CUCSA   | 19  | WSVPSSPNFYSQW   | -1 | training |
| CPC_CUCSA   | 42  | SLQFNFPANAHNV   | -1 | training |
| CPC_CUCSA   | 74  | DVERTSPVIERLD   | -1 | training |
| CPC_CUCSA   | 132 | MPPPVMPPSPSX    | -1 | training |
| CS8A_CONGE  | 55  | TRTCGGPKCTGTC   | 1  | training |
| CS8A_CONGE  | 77  | CRYNVHPSGWGCG   | -1 | training |
| CT1_CONTE   | 11  | GYRMCVPCXXXXX   | 1  | training |
| CT1_CONTE   | 2   | XXXXXDPCCGYRM   | -1 | training |
| CT1A_CONMR  | 60  | GYKLCHPCXXXXX   | 1  | training |
| CT1A_CONMR  | 5   | XXMRCLPVLILL    | -1 | training |
| CT1A_CONMR  | 18  | LLTASAPGVVLP    | -1 | training |
| CT1A_CONMR  | 24  | PGVVVLPKTEDDV   | -1 | training |
| CT1A_CONMR  | 31  | KTEDDVPMSSVYG   | -1 | training |
| CT5A_CONTE  | 31  | KTDDDVPLSLRD    | -1 | training |
| CT5A_CONVC  | 49  | RCCPGKPCCRIGX   | 1  | training |
| CT5A_CONVC  | 10  | LLITSTPSVDARL   | -1 | training |
| CT5A_CONVC  | 23  | KAKDNMPLASFHD   | -1 | training |
| CT5A_CONVC  | 46  | INTRCCPGKPCR    | -1 | training |
| CT5AB_CONTE | 63  | WCCTAAPLTGRXX   | 1  | training |
| CT5AB_CONTE | 5   | XXMRCFPVFILL    | -1 | training |
| CT5AB_CONTE | 18  | LLIASAPCFDART   | -1 | training |
| CT5AB_CONTE | 31  | KTDDDVPLSPLRD   | -1 | training |
| CT5AB_CONTE | 34  | DDVPLSPLRDNLK   | -1 | training |
| CTFA_CONCB  | 8   | RVENKCPHTVCCD   | 1  | training |
| CTFA_CONCB  | 27  | KLIRTRPLMYHVC   | -1 | training |
| CTX_CONMR   | 60  | GVSFCYPCXXXXX   | 1  | training |
| CTX_CONMR   | 18  | LLTASAPGVDVLP   | -1 | training |
| CTX_CONMR   | 24  | PGVDVLPKTEDDV   | -1 | training |
| CTX_CONMR   | 31  | KTEDDVPLSSVYG   | -1 | training |
| CU5A_CONCL  | 50  | DAADV KP VARTNE | 1  | training |
| CU5A_CONCL  | 58  | ARTNEGPRDPAP    | 1  | training |
| CU5A_CONCL  | 62  | EGPRDPAPCCQH    | 1  | training |
| CU5A_CONCL  | 64  | PGRDPAPCCQHPI   | 1  | training |
| CU5A_CONCL  | 69  | APCCQHPIETCCR   | -1 | training |
| CUE2A_CONCL | 57  | SSNKCSPGFPGXX   | 1  | training |
| CUE2A_CONCL | 23  | IETEAGPVNEAGV   | -1 | training |
| CUE2A_CONCL | 42  | LVGRGCPADCPNT   | -1 | training |
| CUE2A_CONCL | 46  | GCPADCPNTCDSS   | -1 | training |
| CUE2A_CONCL | 60  | KCSPGFPGXXXXX   | -1 | training |
| CWP03_PHAVU | 6   | XNMYLPPVPPPPV   | 1  | training |
| CWP03_PHAVU | 8   | MYLPPVPPPPVVP   | 1  | training |
| CWP03_PHAVU | 9   | YLPPVPPPPVVPT   | 1  | training |
| CWP03_PHAVU | 10  | LPPVPPPPVVPTF   | 1  | training |



|             |    |               |    |          |
|-------------|----|---------------|----|----------|
| CWP03_PHAVU | 11 | PPVPPPPVVPTFX | 1  | training |
| CWP03_PHAVU | 5  | XXNMYLPPVPPPP | -1 | training |
| CWP03_PHAVU | 14 | PPPPVVPTFXXXX | -1 | training |
| CWP04_PHAVU | 8  | HYSYSSPPPPPVV | 1  | training |
| CWP04_PHAVU | 9  | YSYSSPPPPPVVS | 1  | training |
| CWP04_PHAVU | 10 | SYSSPPPPPVVSS | 1  | training |
| CWP04_PHAVU | 11 | YSSPPPPPVVSSP | 1  | training |
| CWP04_PHAVU | 12 | SSPPPPPVVSSPP | 1  | training |
| CWP04_PHAVU | 17 | PPVVSSPPPPYYY | 1  | training |
| CWP04_PHAVU | 18 | PVVSSPPPPYYYY | 1  | training |
| CWP04_PHAVU | 19 | VVSSPPPPYYYYS | 1  | training |
| CWP04_PHAVU | 20 | VSSPPPPYYYYSP | 1  | training |
| CWP04_PHAVU | 26 | PYYYYSPPPPVXX | 1  | training |
| CWP04_PHAVU | 27 | YYYYSPPPPVXXX | 1  | training |
| CWP04_PHAVU | 28 | YYYSPPPPVXXXX | 1  | training |
| CWP04_PHAVU | 29 | YYSPPPPVXXXXX | 1  | training |
| CWP31_TOBAC | 6  | XNYQYSPPPPPKK | 1  | training |
| CWP31_TOBAC | 7  | NYQYSPPPPKKK  | 1  | training |
| CWP31_TOBAC | 8  | YQYSPPPPKKKY  | 1  | training |
| CWP31_TOBAC | 9  | QYSPPPPKKKYY  | 1  | training |
| CWP31_TOBAC | 10 | YSPPPPKKKYYX  | 1  | training |
| CX21A_CONPU | 24 | ECLENYPGQASQR | 1  | training |
| CX21A_CONPU | 43 | DATTNCPDTYYFG | 1  | training |
| CX21A_CONPU | 5  | XXFELLPSQDRSC | -1 | training |
| CX21A_CONPU | 52 | YYFGCCPGYATCM | -1 | training |
| CX21A_CONPU | 81 | NRLCFDPGHXXXX | -1 | training |
| CXA1E_CONRE | 6  | XGCCSDPRCRYRC | 1  | training |
| CXAT1_CONMI | 55 | ECQVVTPGSKWGR | 1  | training |
| CXAT1_CONMI | 2  | XXXXXMPKLEMLL | -1 | training |
| CXAT1_CONMI | 15 | LVLLILPLSSFSA | -1 | training |
| CXAT4_CONMS | 56 | ECQINTPGSSWGK | 1  | training |
| CXAT4_CONMS | 15 | LVLLILPLSYFDV | -1 | training |
| CXAT4_CONMS | 40 | NGLARYPQRGGRD | -1 | training |
| CXAT5_CONCE | 56 | ECQIDTPGSSWGK | 1  | training |
| CXAT5_CONMS | 71 | LTRMCGPMCCARS | -1 | training |
| CXPA_CONCF  | 4  | XXXCKCPSCNFND | 1  | training |
| CXPA_CONCF  | 23 | CCIFRQPXXXXXX | 1  | training |
| CXT11_CONAO | 10 | GYKMCHPCXXXXX | 1  | training |
| CXY17_CONCB | 51 | GDSCNEPAGELCC | 1  | training |
| CXY17_CONCB | 16 | ALLLLLPLSTAQD | -1 | training |
| CXY17_CONCB | 69 | VNSRCCPTTDGCX | -1 | training |
| CYC_RICCO   | 79 | YDYLLNPKKYIPG | 1  | training |
| CYC_RICCO   | 7  | ASFDEAPPGDVKA | -1 | training |

|            |     |                |    |          |
|------------|-----|----------------|----|----------|
| CYC_RICCO  | 8   | SFDEAPPGDVKAG  | -1 | training |
| CYC_RICCO  | 38  | AGHKQGPNLNGLF  | -1 | training |
| CYC_RICCO  | 84  | NPKKYIPGTKMVF  | -1 | training |
| CYC_RICCO  | 91  | GTKMVFPGLKKPQ  | -1 | training |
| CYC_RICCO  | 96  | FPGLKKPQDRADL  | -1 | training |
| FIBA_HUMAN | 565 | ESSSHHPGIAEFP  | 1  | training |
| FIBA_HUMAN | 37  | GGVVRGPRVVERH  | -1 | training |
| FIBA_HUMAN | 53  | CKDSDWPFCSDED  | -1 | training |
| FIBA_HUMAN | 65  | DWNYKCPSGCRMK  | -1 | training |
| FIBA_HUMAN | 214 | IAKDLLPSRDRQH  | -1 | training |
| FIBA_HUMAN | 222 | RDRQHPLIKMKP   | -1 | training |
| FIBA_HUMAN | 228 | PLIKMKPVPDLVP  | -1 | training |
| FIBA_HUMAN | 230 | IKMKPVPDLVPGN  | -1 | training |
| FIBA_HUMAN | 234 | PVPDLVPGNFKSQ  | -1 | training |
| FIBA_HUMAN | 245 | SQLQKVPPEWKAL  | -1 | training |
| FIBA_HUMAN | 246 | QLQKVPPEWKALT  | -1 | training |
| FIBA_HUMAN | 255 | KALTDMPQMRMEL  | -1 | training |
| FIBA_HUMAN | 264 | RMELERPGGNEIT  | -1 | training |
| FIBA_HUMAN | 286 | GSETESPRNPSSA  | -1 | training |
| FIBA_HUMAN | 289 | TESPRNPSSAGSW  | -1 | training |
| FIBA_HUMAN | 302 | NSGSSGPGSTGNR  | -1 | training |
| FIBA_HUMAN | 310 | STGNRNPGSSGTG  | -1 | training |
| FIBA_HUMAN | 323 | GTATWKPGSSGPG  | -1 | training |
| FIBA_HUMAN | 328 | KPGSSGPGSTGSW  | -1 | training |
| FIBA_HUMAN | 349 | STGNQNPSPRPG   | -1 | training |
| FIBA_HUMAN | 352 | NQNPSPRPGSTG   | -1 | training |
| FIBA_HUMAN | 354 | NPGSPRPGSTGTW  | -1 | training |
| FIBA_HUMAN | 362 | STGTWNPSSERG   | -1 | training |
| FIBA_HUMAN | 395 | ESGSFRPDSPGSG  | -1 | training |
| FIBA_HUMAN | 398 | SFRPDSPGSGNAR  | -1 | training |
| FIBA_HUMAN | 405 | GSGNARPNNPDWG  | -1 | training |
| FIBA_HUMAN | 408 | NARPNNPDWGTFE  | -1 | training |
| FIBA_HUMAN | 422 | VSGNVSPGTRREY  | -1 | training |
| FIBA_HUMAN | 472 | TKTVIGPDGHKEV  | -1 | training |
| FIBA_HUMAN | 492 | EDGSDCPEAMD LG | -1 | training |
| FIBA_HUMAN | 514 | GFRHRHPDEAAFF  | -1 | training |
| FIBA_HUMAN | 530 | STGKTFPGFFSPM  | -1 | training |
| FIBA_HUMAN | 535 | FPGFFSPMLGEFV  | -1 | training |
| FIBA_HUMAN | 571 | PGIAEFPSRGKSS  | -1 | training |
| FIBA_HUMAN | 628 | GHAksRPVRDCDD  | -1 | training |
| FIBA_HUMAN | 640 | DVLQTHPSGTQSG  | -1 | training |
| FIBA_HUMAN | 653 | IFNIKLPGSSKIF  | -1 | training |
| FIBA_HUMAN | 823 | LNGIYYPGGSYDP  | -1 | training |

|            |     |               |    |          |
|------------|-----|---------------|----|----------|
| FIBA_HUMAN | 829 | PGGSYDPRNNSPY | -1 | training |
| FIBA_HUMAN | 834 | DPRNNSPYEIENG | -1 | training |
| FIBA_HUMAN | 862 | VRMKIRPLVTQXX | -1 | training |
| FP1_MYTED  | 89  | PTYKPKPSYPPTY | 1  | training |
| FP1_MYTED  | 92  | KPKPSYPPTYKSK | 1  | training |
| FP1_MYTED  | 93  | PKPSYPPTYKSKP | 1  | training |
| FP1_MYTED  | 115 | PTYKAKPSYPSSY | 1  | training |
| FP1_MYTED  | 118 | KAKPSYPSSYKPK | 1  | training |
| FP1_MYTED  | 148 | KPKPSYPPTYKPK | 1  | training |
| FP1_MYTED  | 149 | PKPSYPPTYKPKP | 1  | training |
| FP1_MYTED  | 155 | PTYKPKPSYPPSY | 1  | training |
| FP1_MYTED  | 158 | KPKPSYPPSYKTK | 1  | training |
| FP1_MYTED  | 159 | PKPSYPPSYKTKK | 1  | training |
| FP1_MYTED  | 175 | SSYKAKPSYPPTY | 1  | training |
| FP1_MYTED  | 178 | KAKPSYPPTYKAK | 1  | training |
| FP1_MYTED  | 179 | AKPSYPPTYKAKP | 1  | training |
| FP1_MYTED  | 185 | PTYKAKPSYPPTY | 1  | training |
| FP1_MYTED  | 211 | PTYKAKPTYPSTY | 1  | training |
| FP1_MYTED  | 214 | KAKPTYPSTYKAK | 1  | training |
| FP1_MYTED  | 221 | STYKAKPSYPPTY | 1  | training |
| FP1_MYTED  | 433 | STYKAKPSYPPSY | 1  | training |
| FP1_MYTED  | 436 | KAKPSYPPSYKAK | 1  | training |
| FP1_MYTED  | 437 | AKPSYPPSYKAKP | 1  | training |
| FP1_MYTED  | 443 | PSYKAKPSYPPTY | 1  | training |
| FP1_MYTED  | 469 | STYKAKPSYPASY | 1  | training |
| FP1_MYTED  | 472 | KAKPSYPASYKAK | 1  | training |
| FP1_MYTED  | 479 | ASYKAKPSYPPTY | 1  | training |
| FP1_MYTED  | 482 | KAKPSYPPTYKSK | 1  | training |
| FP1_MYTED  | 483 | AKPSYPPTYKSKS | 1  | training |
| FP1_MYTED  | 522 | KPKPSYPPSYKPK | 1  | training |
| FP1_MYTED  | 523 | PKPSYPPSYKPKT | 1  | training |
| FP1_MYTED  | 542 | KPKISYPPTYKAK | 1  | training |
| FP1_MYTED  | 543 | PKISYPPTYKAKP | 1  | training |
| FP1_MYTED  | 549 | PTYKAKPSYPATY | 1  | training |
| FP1_MYTED  | 552 | KAKPSYPATYKAK | 1  | training |
| FP1_MYTED  | 559 | ATYKAKPSYPPTY | 1  | training |
| FP1_MYTED  | 595 | PSYKAKPTYPSTY | 1  | training |
| FP1_MYTED  | 648 | KAKPSYPPTYKPK | 1  | training |
| FP1_MYTED  | 649 | AKPSYPPTYKPKI | 1  | training |
| FP1_MYTED  | 753 | PTYKAKPTYPPTY | 1  | training |
| FP1_MYTED  | 756 | KAKPTYPPTYKAK | 1  | training |
| FP1_MYTED  | 757 | AKPTYPPTYKAKP | 1  | training |
| FP1_MYTED  | 767 | AKPSYPPTYKPKP | 1  | training |

|           |     |                |    |          |
|-----------|-----|----------------|----|----------|
| FP1_MYTED | 777 | PKPSYPPTYKSKS  | 1  | training |
| FP1_MYTED | 817 | PKPSYPPSYKPKI  | 1  | training |
| FP1_MYTED | 833 | STYKCLKPSYPPTY | 1  | training |
| FP1_MYTED | 836 | KLKPSYPPTYKSK  | 1  | training |
| FP1_MYTED | 837 | LKPSYPPTYKSKT  | 1  | training |
| FP1_MYTED | 866 | KAKTSYPPAYKPT  | 1  | training |
| FP1_MYTED | 867 | AKTSYPPAYKPTN  | 1  | training |
| FP1_MYTED | 5   | XXTKHEPVYKPVK  | -1 | training |
| FP1_MYTED | 9   | HEPVYKPVKTSYS  | -1 | training |
| FP1_MYTED | 17  | KTSYSAPYKPPTY  | -1 | training |
| FP1_MYTED | 20  | YSAPYKPPTYQPL  | -1 | training |
| FP1_MYTED | 21  | SAPYKPPTYQPLK  | -1 | training |
| FP1_MYTED | 25  | KPPTYQPLKKKVD  | -1 | training |
| FP1_MYTED | 34  | KKVDYRPTKSYPP  | -1 | training |
| FP1_MYTED | 39  | RPTKSYPPTYGSK  | -1 | training |
| FP1_MYTED | 40  | PTKSYPPTYGSKT  | -1 | training |
| FP1_MYTED | 50  | SKTNYLPLAKKLS  | -1 | training |
| FP1_MYTED | 60  | KLSSYKPIKTTYN  | -1 | training |
| FP1_MYTED | 72  | NAKTNYPPVYKPK  | -1 | training |
| FP1_MYTED | 73  | AKTNYPPVYKPKM  | -1 | training |
| FP1_MYTED | 77  | YPPVYKPKMTYPP  | -1 | training |
| FP1_MYTED | 82  | KPKMTYPPTYKPK  | -1 | training |
| FP1_MYTED | 83  | PKMTYPPTYKPKP  | -1 | training |
| FP1_MYTED | 87  | YPPTYKPKPSYPP  | -1 | training |
| FP1_MYTED | 99  | PTYKSKPTYKPKI  | -1 | training |
| FP1_MYTED | 103 | SKPTYKPKITYPP  | -1 | training |
| FP1_MYTED | 108 | KPKITYPPTYKAK  | -1 | training |
| FP1_MYTED | 109 | PKITYPPTYKAKP  | -1 | training |
| FP1_MYTED | 123 | YPSSYKPKKTYPP  | -1 | training |
| FP1_MYTED | 128 | KPKKTYPPTYKPK  | -1 | training |
| FP1_MYTED | 129 | PKKTYPPTYKPKL  | -1 | training |
| FP1_MYTED | 133 | YPPTYKPKLTYPP  | -1 | training |
| FP1_MYTED | 138 | KPKLTYPPTYKPK  | -1 | training |
| FP1_MYTED | 139 | PKLTYPPTYKPKP  | -1 | training |
| FP1_MYTED | 168 | KTKKTYPSSYKAK  | -1 | training |
| FP1_MYTED | 205 | PTYKAKPTYKAKP  | -1 | training |
| FP1_MYTED | 492 | KSKSSYPSSYKPK  | -1 | training |
| FP1_MYTED | 507 | YPPTYKPKLTYKP  | -1 | training |
| FP1_MYTED | 513 | PKLTYKPTYKPKP  | -1 | training |
| FP1_MYTED | 517 | YKPTYKPKPSYPP  | -1 | training |
| FP1_MYTED | 527 | YPPSYKPKTTYPP  | -1 | training |
| FP1_MYTED | 532 | KPKTTYPPTYKPK  | -1 | training |
| FP1_MYTED | 533 | PKTTYPPTYKPKI  | -1 | training |

|             |     |                |    |          |
|-------------|-----|----------------|----|----------|
| FP1_MYTED   | 537 | YPPTYKPKISYPP  | -1 | training |
| FP1_MYTED   | 589 | PTYKAKPSYKAKP  | -1 | training |
| FP1_MYTED   | 691 | PTYKAKPTNPSTY  | -1 | training |
| FP1_MYTED   | 694 | KAKPTNPSTYKAK  | -1 | training |
| FP1_MYTED   | 747 | STYKAKPTYKAKP  | -1 | training |
| FP1_MYTED   | 786 | KSKSIYPSSYKPK  | -1 | training |
| FP1_MYTED   | 821 | YPPSYKPKITYPS  | -1 | training |
| FP1_MYTED   | 826 | KPKITYPSTYKLLK | -1 | training |
| FP1_MYTED   | 846 | KSKTSYPPTYNKK  | -1 | training |
| FP1_MYTED   | 847 | SKTSYPPTYNKKI  | -1 | training |
| FP1_MYTED   | 856 | NKKISYPSSYKAK  | -1 | training |
| FP1_MYTED   | 871 | YPPAYKPTNRYXX  | -1 | training |
| FP1V2_PERVI | 114 | AWKAPPVWTAWK   | -1 | training |
| FP1V2_PERVI | 123 | TAWKATPKPRTAW  | -1 | training |
| FP1V2_PERVI | 143 | TAWKAAPKPWTAW  | -1 | training |
| HIF1A_HUMAN | 402 | ALTLLAPAAGDTI  | 1  | training |
| HIF1A_HUMAN | 564 | DLEMLAPYIPMDD  | 1  | training |
| HIF1A_HUMAN | 45  | ELAHQLPLPHNVS  | -1 | training |
| HIF1A_HUMAN | 47  | AHQLPLPHNVSSH  | -1 | training |
| HIF1A_HUMAN | 138 | VDFTHPCDHEEM   | -1 | training |
| HIF1A_HUMAN | 208 | DTNSNQPCGYKK   | -1 | training |
| HIF1A_HUMAN | 215 | QCGYKKPPMTCLV  | -1 | training |
| HIF1A_HUMAN | 216 | CGYKKPPMTCLVL  | -1 | training |
| HIF1A_HUMAN | 226 | LVLICEPIPHPSN  | -1 | training |
| HIF1A_HUMAN | 228 | LICEPIPHPSNIE  | -1 | training |
| HIF1A_HUMAN | 230 | CEPIPHPSNIEIP  | -1 | training |
| HIF1A_HUMAN | 236 | PSNIEIPLDSKTF  | -1 | training |
| HIF1A_HUMAN | 267 | ELMGYEPEELLGR  | -1 | training |
| HIF1A_HUMAN | 332 | NTKNSQPQCIVCV  | -1 | training |
| HIF1A_HUMAN | 363 | TECVLKPVESSDM  | -1 | training |
| HIF1A_HUMAN | 394 | DKLKKEPDALTLL  | -1 | training |
| HIF1A_HUMAN | 429 | QLEEVPLYNDVM   | -1 | training |
| HIF1A_HUMAN | 437 | YNDVMLPSPNEKL  | -1 | training |
| HIF1A_HUMAN | 439 | DVMLPSPNEKLQN  | -1 | training |
| HIF1A_HUMAN | 452 | INLAMSPLPTAET  | -1 | training |
| HIF1A_HUMAN | 454 | LAMSPLPTAETPK  | -1 | training |
| HIF1A_HUMAN | 459 | LPTAETPKPLRSS  | -1 | training |
| HIF1A_HUMAN | 461 | TAETPKPLRSSAD  | -1 | training |
| HIF1A_HUMAN | 468 | LRSSADPALNQEV  | -1 | training |
| HIF1A_HUMAN | 480 | VALKLEPNPESLE  | -1 | training |
| HIF1A_HUMAN | 482 | LKLEPNPESLELS  | -1 | training |
| HIF1A_HUMAN | 492 | ELSFTMPQIQDQT  | -1 | training |
| HIF1A_HUMAN | 499 | QIQDQTPSPSDGS  | -1 | training |

|             |     |               |    |          |
|-------------|-----|---------------|----|----------|
| HIF1A_HUMAN | 501 | QDQTPSPSDGSTR | -1 | training |
| HIF1A_HUMAN | 511 | STRQSSPEPNSPS | -1 | training |
| HIF1A_HUMAN | 513 | RQSSPEPNSPSEY | -1 | training |
| HIF1A_HUMAN | 516 | SPEPNSPSEYCFY | -1 | training |
| HIF1A_HUMAN | 549 | DTEAKNPFSTQDT | -1 | training |
| HIF1A_HUMAN | 567 | MLAPYIPMDDDFQ | -1 | training |
| HIF1A_HUMAN | 582 | SFDQLSPLESSSA | -1 | training |
| HIF1A_HUMAN | 590 | ESSSASPESASPQ | -1 | training |
| HIF1A_HUMAN | 595 | SPESASPQSTVTV | -1 | training |
| HIF1A_HUMAN | 610 | QTQIQEPTANATT | -1 | training |
| HIF1A_HUMAN | 642 | KILIASPSPTHIH | -1 | training |
| HIF1A_HUMAN | 644 | LIASPSPTHIHKE | -1 | training |
| HIF1A_HUMAN | 658 | TSATSSPYRDTQS | -1 | training |
| HIF1A_HUMAN | 669 | QSRTASPNRAGKG | -1 | training |
| HIF1A_HUMAN | 685 | QTEKSHPRSPNVL | -1 | training |
| HIF1A_HUMAN | 688 | KSHPRSPNVLSVA | -1 | training |
| HIF1A_HUMAN | 702 | SQRTTVPEEELNP | -1 | training |
| HIF1A_HUMAN | 708 | PEEELNPKILALQ | -1 | training |
| HIF1A_HUMAN | 741 | GTLLQQPDDHAAT | -1 | training |
| HIF1A_HUMAN | 775 | KTIILIPSDLACR | -1 | training |
| HIF1A_HUMAN | 793 | MDEGLPQLTSYD  | -1 | training |
| HIF1A_HUMAN | 805 | DCEVNAPIQGSRN | -1 | training |
| HIF3A_HUMAN | 492 | DLEMLAPYISMDD | 1  | training |
| HIF3A_HUMAN | 42  | QLAHTLPFARGVS | -1 | training |
| HIF3A_HUMAN | 84  | VGAGGEPLDACYL | -1 | training |
| HIF3A_HUMAN | 135 | IFDFIHPCDQEEL | -1 | training |
| HIF3A_HUMAN | 147 | LQDALTPQQTLR  | -1 | training |
| HIF3A_HUMAN | 159 | RRKVEAPTERCFS | -1 | training |
| HIF3A_HUMAN | 200 | HMRAYKPPAQTSP | -1 | training |
| HIF3A_HUMAN | 201 | MRAYKPPAQTSPA | -1 | training |
| HIF3A_HUMAN | 206 | PPAQTSPAGSPDS | -1 | training |
| HIF3A_HUMAN | 210 | TSPAGSPDSEPPL | -1 | training |
| HIF3A_HUMAN | 214 | GSPDSEPPLQCLV | -1 | training |
| HIF3A_HUMAN | 215 | SPDSEPPLQCLVL | -1 | training |
| HIF3A_HUMAN | 227 | LICEAIPHPGSLE | -1 | training |
| HIF3A_HUMAN | 229 | CEAIPHPGSLEPP | -1 | training |
| HIF3A_HUMAN | 234 | HPGSLEPPLGRGA | -1 | training |
| HIF3A_HUMAN | 235 | PGSLEPPLGRGAF | -1 | training |
| HIF3A_HUMAN | 266 | EVAGYSPDDLIGC | -1 | training |
| HIF3A_HUMAN | 329 | VSGGRGPQSESIV | -1 | training |
| HIF3A_HUMAN | 363 | EQHSRRPIQRGAP | -1 | training |
| HIF3A_HUMAN | 369 | PIQRGAPSQKDTP | -1 | training |
| HIF3A_HUMAN | 375 | PSQKDTPNPGDSL | -1 | training |

|             |     |                |    |          |
|-------------|-----|----------------|----|----------|
| HIF3A_HUMAN | 377 | QKDTPNPGDSLDT  | -1 | training |
| HIF3A_HUMAN | 384 | GDSLDTPGPRILA  | -1 | training |
| HIF3A_HUMAN | 386 | SLDTPGPRIL AFL | -1 | training |
| HIF3A_HUMAN | 394 | IL AFLHPPSLSEA | -1 | training |
| HIF3A_HUMAN | 395 | L AFLHPPSLSEAA | -1 | training |
| HIF3A_HUMAN | 406 | AALAADPRRFCSP  | -1 | training |
| HIF3A_HUMAN | 412 | PRRFCSPDLRRL   | -1 | training |
| HIF3A_HUMAN | 420 | LRRL LGPILDGAS | -1 | training |
| HIF3A_HUMAN | 431 | ASVAATPSTPLAT  | -1 | training |
| HIF3A_HUMAN | 434 | AATPSTPLATRHP  | -1 | training |
| HIF3A_HUMAN | 440 | PLATRHPQSPLSA  | -1 | training |
| HIF3A_HUMAN | 443 | TRHPQSPLSADLP  | -1 | training |
| HIF3A_HUMAN | 449 | PLSADLPDELPVG  | -1 | training |
| HIF3A_HUMAN | 453 | DLPDELPVGTENV  | -1 | training |
| HIF3A_HUMAN | 509 | NASEQLPRAYHRP  | -1 | training |
| HIF3A_HUMAN | 515 | PRAYHRPLGAVPR  | -1 | training |
| HIF3A_HUMAN | 520 | RPLGAVPRPRARS  | -1 | training |
| HIF3A_HUMAN | 522 | LGAVPRPRARSFH  | -1 | training |
| HIF3A_HUMAN | 532 | SFHGLSPPALEPS  | -1 | training |
| HIF3A_HUMAN | 533 | FHGLSPPALEPSL  | -1 | training |
| HIF3A_HUMAN | 537 | SPPALEPSLLPRW  | -1 | training |
| HIF3A_HUMAN | 541 | LEPSLLPRWGSDP  | -1 | training |
| HIF3A_HUMAN | 547 | PRWGSDPRLSCSS  | -1 | training |
| HIF3A_HUMAN | 554 | RLSCSSPSRGDPS  | -1 | training |
| HIF3A_HUMAN | 559 | SPSRGDPSASSPM  | -1 | training |
| HIF3A_HUMAN | 564 | DPSASSPMAGARK  | -1 | training |
| HIF3A_HUMAN | 591 | EL LGVRPPKRSPS | -1 | training |
| HIF3A_HUMAN | 592 | LLGVRPPKRSPSP  | -1 | training |
| HIF3A_HUMAN | 596 | RPPKRSPSPEHEN  | -1 | training |
| HIF3A_HUMAN | 598 | PKRSPSPEHENFL  | -1 | training |
| HIF3A_HUMAN | 607 | ENFL LFPLSLSFL | -1 | training |
| HIF3A_HUMAN | 618 | FLLTGGPAPGSLQ  | -1 | training |
| HIF3A_HUMAN | 620 | LTGGPAPGSLQDP  | -1 | training |
| HIF3A_HUMAN | 626 | PGSLQDPSTPLL N | -1 | training |
| HIF3A_HUMAN | 629 | LQDPSTPLLNLNE  | -1 | training |
| HIF3A_HUMAN | 636 | LLNLNEPLGLGPS  | -1 | training |
| HIF3A_HUMAN | 641 | EPLGLGPSLLSPY  | -1 | training |
| HIF3A_HUMAN | 646 | GPSLLSPYSDEDT  | -1 | training |
| HIF3A_HUMAN | 655 | DEDTTQPGGPFQP  | -1 | training |
| HIF3A_HUMAN | 658 | TTQPGGPFQPRAG  | -1 | training |
| HIF3A_HUMAN | 661 | PGGPFQPRAGSAQ  | -1 | training |
| HSY1_SOLLC  | 51  | GNYGRTPYKTPPP  | 1  | training |
| HSY1_SOLLC  | 55  | RTPYKTPPPPTSS  | 1  | training |

|            |     |               |    |          |
|------------|-----|---------------|----|----------|
| HSY1_SOLLC | 56  | TPYKTPPPPTSSS | 1  | training |
| HSY1_SOLLC | 57  | PYKTPPPPTSSSP | 1  | training |
| HSY1_SOLLC | 58  | YKTPPPPTSSSPT | 1  | training |
| HSY1_SOLLC | 63  | PPTSSSPTHQEIV | 1  | training |
| HSY1_SOLLC | 79  | HDSVLPPSPKTD  | 1  | training |
| HSY1_SOLLC | 80  | DSVLPPSPKTD   | 1  | training |
| HSY1_SOLLC | 82  | VLPPSPKTDPII  | 1  | training |
| HSY1_SOLLC | 119 | HDYVASPPPPKPQ | 1  | training |
| HSY1_SOLLC | 120 | DYVASPPPPKPQD | 1  | training |
| HSY1_SOLLC | 121 | YVASPPPPKPQDE | 1  | training |
| HSY1_SOLLC | 122 | VASPPPPKPQDEQ | 1  | training |
| HSY1_SOLLC | 78  | RHDSVLPPSPKT  | -1 | training |
| HSY1_SOLLC | 86  | PSPKTDPIIGQLT | -1 | training |
| HSY1_SOLLC | 98  | TTITTTPHHDDTV | -1 | training |
| HSY1_SOLLC | 107 | DDTVAAPPVGGRH | -1 | training |
| HSY1_SOLLC | 108 | DTVAAPPVGGRHD | -1 | training |
| HSY1_SOLLC | 124 | SPPPPKPQDEQRQ | -1 | training |
| HSY1_SOLLC | 141 | SSSSTLPLQASYX | -1 | training |
| HSYA_TOBAC | 42  | RGANLPPSPASS  | 1  | training |
| HSYA_TOBAC | 43  | GANLPPSPASSP  | 1  | training |
| HSYA_TOBAC | 45  | NLPPSPASSPPS  | 1  | training |
| HSYA_TOBAC | 49  | PSPASSPPSKEVS | 1  | training |
| HSYA_TOBAC | 50  | SPASSPPSKEVSN | 1  | training |
| HSYA_TOBAC | 150 | NRKPLSPPSPKPA | 1  | training |
| HSYA_TOBAC | 151 | RKPLSPPSPKPAD | 1  | training |
| HSYA_TOBAC | 153 | PLSPPSPKPADGQ | 1  | training |
| HSYA_TOBAC | 13  | IYLILSPFGAEAR | -1 | training |
| HSYA_TOBAC | 41  | GRGANLPPSPAS  | -1 | training |
| HSYA_TOBAC | 91  | NQLFSFPTSADNY | -1 | training |
| HSYA_TOBAC | 113 | FISYLLPVSYVWN | -1 | training |
| HSYA_TOBAC | 147 | RYWNRKPLSPPSP | -1 | training |
| HSYA_TOBAC | 155 | SPPSPKPADGQRP | -1 | training |
| HSYA_TOBAC | 161 | PADGQRPLHSYXX | -1 | training |
| HSYB_TOBAC | 42  | RGTNLPPSPASS  | 1  | training |
| HSYB_TOBAC | 43  | GTNLPPSPASSP  | 1  | training |
| HSYB_TOBAC | 13  | IYLILSPFRAVSR | -1 | training |
| HSYB_TOBAC | 41  | GRGTNLPPSPAS  | -1 | training |
| HSYB_TOBAC | 60  | VSNSVSPTRTDEK | -1 | training |
| HSYB_TOBAC | 89  | NSNQLFPFLTSSD | -1 | training |
| HSYB_TOBAC | 112 | SISYLLPVSYVWK | -1 | training |
| HSYB_TOBAC | 146 | KYWNRKPLSPPSP | -1 | training |
| HSYB_TOBAC | 154 | SPPSPKPADGHRP | -1 | training |
| HSYB_TOBAC | 160 | PADGHRPLQSYXX | -1 | training |



|                  |     |                |    |          |
|------------------|-----|----------------|----|----------|
| KPYM_HUMAN       | 403 | ELRRLAPITSDPT  | 1  | training |
| KPYM_HUMAN       | 408 | APITSDPTEATAV  | 1  | training |
| KPYM_HUMAN       | 4   | XXXMSKPHSEAGT  | -1 | training |
| KPYM_HUMAN       | 38  | RLDIDSPITARN   | -1 | training |
| KPYM_HUMAN       | 39  | LDIDSPITARNT   | -1 | training |
| KPYM_HUMAN       | 53  | IICTIGPASRSVE  | -1 | training |
| KPYM_HUMAN       | 102 | ESFASDPILYRPV  | -1 | training |
| KPYM_HUMAN       | 107 | DPILYRPVAVALD  | -1 | training |
| KPYM_HUMAN       | 117 | ALDTKGPEIRTGL  | -1 | training |
| KPYM_HUMAN       | 212 | KKGVNLPGAAVDL  | -1 | training |
| KPYM_HUMAN       | 219 | GAAVDLPVSEKD   | -1 | training |
| KPYM_HUMAN       | 302 | DLGIEIPAQKVFLL | -1 | training |
| KPYM_HUMAN       | 323 | CNRAGKPVICATQ  | -1 | training |
| KPYM_HUMAN       | 338 | ESMIKKPRPTRAEE | -1 | training |
| KPYM_HUMAN       | 340 | MIKKPRPTRAEGS  | -1 | training |
| KPYM_HUMAN       | 371 | TAKGDYPLEAVRM  | -1 | training |
| KPYM_HUMAN       | 446 | QVARYRPRAPIIA  | -1 | training |
| KPYM_HUMAN       | 449 | RYRPRAPIIAVTR  | -1 | training |
| KPYM_HUMAN       | 457 | IAVTRNPQTARQA  | -1 | training |
| KPYM_HUMAN       | 471 | LYRGIFPVLCKDP  | -1 | training |
| KPYM_HUMAN       | 477 | PVLCKDPVQEAWA  | -1 | training |
| KPYM_HUMAN       | 517 | VLTGWRPGSGFTN  | -1 | training |
| KPYM_HUMAN       | 529 | NTMRVVPVPXXXX  | -1 | training |
| KPYM_HUMAN       | 531 | MRVVPVPXXXXXX  | -1 | training |
| LAN91_MICS0      | 14  | TPGCTSPGGGSNC  | 1  | training |
| LAN91_MICS0      | 9   | SWSLCTPGCTSPG  | -1 | training |
| O226A_CONTE      | 58  | WQYCESPTDCCSW  | 1  | training |
| O226A_CONTE      | 26  | LFQEKRPMMKIDF  | -1 | training |
| O236D_CONTE      | 49  | QKRLCPDYTDPC   | 1  | training |
| O236D_CONTE      | 54  | CPDYTDPCSHAHE  | 1  | training |
| O236D_CONTE      | 26  | VLQEKRPKEKIKF  | -1 | training |
| O236E_CONTE      | 49  | QKRLCPDYTEPC   | 1  | training |
| O236E_CONTE      | 54  | CPDYTEPCSHAHE  | 1  | training |
| OSTCN_BOVIN      | 60  | DHWLGAPAPYPDP  | 1  | training |
| OSTCN_BOVIN      | 4   | XXXMRTPMLLALL  | -1 | training |
| OSTCN_BOVIN      | 25  | GRADAKPGDAESG  | -1 | training |
| OSTCN_BOVIN      | 62  | WLGAPAPYDPLE   | -1 | training |
| OSTCN_BOVIN      | 64  | GAPAPYDPLEPK   | -1 | training |
| OSTCN_BOVIN      | 66  | PAPYDPLEPKRE   | -1 | training |
| OSTCN_BOVIN      | 69  | YDPLEPKREVCE   | -1 | training |
| OSTCN_BOVIN      | 78  | EVCELNPDCDELA  | -1 | training |
| OSTCN_BOVIN      | 99  | YRRFYGPVXXXXXX | -1 | training |
| OSTCN_CAMBA;OSTC | 9   | DHGLGAPAPYVDP  | 1  | training |

|                                             |    |                |    |          |
|---------------------------------------------|----|----------------|----|----------|
| N_CAMDR;OSTCN_LA<br>MGU                     |    |                |    |          |
| OSTCN_CAMBA;OSTC<br>N_CAMDR;OSTCN_LA<br>MGU | 11 | GLGAPAPYVDPLE  | -1 | training |
| OSTCN_CAMBA;OSTC<br>N_CAMDR;OSTCN_LA<br>MGU | 15 | PAPYVDPLEPKRE  | -1 | training |
| OSTCN_CAMBA;OSTC<br>N_CAMDR;OSTCN_LA<br>MGU | 18 | YVDPLEPKREVCE  | -1 | training |
| OSTCN_CAMHE                                 | 18 | YVDPLEPKREVDE  | -1 | training |
| OSTCN_FELCA                                 | 9  | APGLGAPAPYPDP  | 1  | training |
| OSTCN_FELCA                                 | 4  | XXXYLAPGLGAPA  | -1 | training |
| OSTCN_FELCA                                 | 11 | GLGAPAPYPDPLE  | -1 | training |
| OSTCN_FELCA                                 | 18 | YDPLEPKREICE   | -1 | training |
| OSTCN_FELCA                                 | 27 | EICELNPDCDELA  | -1 | training |
| OSTCN_GORGO                                 | 60 | YQWLGAPVPYPDP  | 1  | training |
| OSTCN_GORGO                                 | 25 | GQAGAKPSGAESS  | -1 | training |
| OSTCN_GORGO                                 | 49 | SEVVKRPRRYLYQ  | -1 | training |
| OSTCN_GORGO                                 | 62 | WLGAPVPYPDPLE  | -1 | training |
| OSTCN_GORGO                                 | 64 | GAPVPYPDPLEPR  | -1 | training |
| OSTCN_GORGO                                 | 66 | PVPYPDPLEPRRE  | -1 | training |
| OSTCN_GORGO                                 | 69 | YDPLEPRREVCE   | -1 | training |
| OSTCN_MACFA                                 | 9  | YQWLGAPAPYPDP  | 1  | training |
| PRP_PHAVU                                   | 6  | XNYDKPPVEKPPV  | 1  | training |
| PRP_PHAVU                                   | 11 | PPVEKPPVYKPPV  | 1  | training |
| PRP_PHAVU                                   | 16 | PPVYKPPVEKPPV  | 1  | training |
| PRP_PHAVU                                   | 21 | PPVEKPPVYKPPX  | 1  | training |
| PRP_PHAVU                                   | 5  | XXNYDKPPVEKPP  | -1 | training |
| PRP_PHAVU                                   | 10 | KPPVEKPPVYKPP  | -1 | training |
| PRP_PHAVU                                   | 15 | KPPVYKPPVEKPP  | -1 | training |
| PRP_PHAVU                                   | 20 | KPPVEKPPVYKPPX | -1 | training |
| PRP_PHAVU                                   | 25 | KPPVYKPPXXXXXX | -1 | training |
| PSY1_ARATH                                  | 63 | KHDPGVPPSATGQ  | 1  | training |
| PSY1_ARATH                                  | 64 | HDPGVPPSATGQR  | 1  | training |
| PSY1_ARATH                                  | 25 | SSLARNPVSVSGG  | -1 | training |
| PSY1_ARATH                                  | 52 | VEDYGDPSANPKH  | -1 | training |
| PSY1_ARATH                                  | 56 | GDPSANPKHDPGV  | -1 | training |
| PSY1_ARATH                                  | 60 | ANPKHDPGVPPSA  | -1 | training |
| SFTPA_RAT                                   | 30 | DVCAGSPGIPGAP  | 1  | training |
| SFTPA_RAT                                   | 33 | AGSPGIPGAPGNH  | 1  | training |
| SFTPA_RAT                                   | 36 | PGIPGAPGNHGLP  | 1  | training |

|             |     |                |    |                     |
|-------------|-----|----------------|----|---------------------|
| SFTPA_RAT   | 42  | PGNHGLPGRDGRD  | 1  | training            |
| SFTPA_RAT   | 54  | DGVKGDPPGPPGPM | 1  | training            |
| SFTPA_RAT   | 57  | KGDPPGPPGPMGPP | 1  | training            |
| SFTPA_RAT   | 63  | PGPMGPPGMPGL   | 1  | training            |
| SFTPA_RAT   | 67  | GPPGGMPGLPGRD  | 1  | training            |
| SFTPA_RAT   | 70  | GGMPGLPGRDGLP  | 1  | training            |
| SFTPA_RAT   | 76  | PGRDGLPGAPGAP  | 1  | training            |
| SFTPA_RAT   | 56  | VKGDPPGPPGPMGP | -1 | training            |
| SFTPA_RAT   | 59  | DPGPPGPMGPPGG  | -1 | training            |
| SFTPA_RAT   | 62  | PPGPMGPPGGMPG  | -1 | training            |
| SFTPA_RAT   | 79  | DGLPGAPGAPGER  | -1 | training            |
| SFTPA_RAT   | 82  | PGAPGAPGERGDK  | -1 | training            |
| SFTPA_RAT   | 91  | RGDKGEPGERGLP  | -1 | training            |
| SFTPA_RAT   | 97  | PGERGLPGFPAYL  | -1 | training            |
| SFTPA_RAT   | 100 | RGLPGFPAYLDEE  | -1 | training            |
| SFTPA_RAT   | 165 | GGNIAVPRTPEEN  | -1 | training            |
| SFTPA_RAT   | 168 | IAVPRTPEENEAI  | -1 | training            |
| SFTPA_RAT   | 195 | MIEDQTPGDFHYL  | -1 | training            |
| SFTPA_RAT   | 213 | NYTNWYPGEPRGQ  | -1 | training            |
| SFTPA_RAT   | 216 | NWYPGEPRGQGKE  | -1 | training            |
| SHT12_STIHA | 6   | XXIIGAPCRRCYH  | 1  | training            |
| SKP1A_DICDI | 143 | IKNDFTPEEEEQI  | 1  | training            |
| SKP1A_DICDI | 40  | IGESDSPIPLPNV  | -1 | training            |
| SKP1A_DICDI | 42  | ESDSPIPLPNVTS  | -1 | training            |
| SKP1A_DICDI | 44  | DSPIPLPNVTSTI  | -1 | training            |
| SKP1A_DICDI | 65  | RHHHQHPSQGGDD  | -1 | training            |
| SKP1A_DICDI | 67  | HHQHPSQGGDDKK  | -1 | training            |
| SKP1A_DICDI | 82  | KRLDDIPPYDRDF  | -1 | training            |
| SKP1A_DICDI | 83  | RLDDIPPYDRDFC  | -1 | training            |
| SKP1A_DICDI | 94  | FCKVDQPTLFELI  | -1 | training            |
| SKP1A_DICDI | 110 | NYLDIKPLLDVTC  | -1 | training            |
| SKP1A_DICDI | 128 | MIRGKTPEEIRKI  | -1 | training            |
| SKP1B_DICDI | 40  | IGESDAPIPLPNV  | -1 | training            |
| SKP1B_DICDI | 42  | ESDAPIPLPNVTS  | -1 | training            |
| SKP1B_DICDI | 44  | DAPIPLPNVTSTI  | -1 | training            |
| TXM46_CONAO | 12  | CGLGCHPCCXXXX  | 1  | training            |
| TY01_PHYAZ  | 56  | ERRDRPPSWIPKX  | 1  | training            |
| TY01_PHYAZ  | 55  | EERRDRPPSWIPK  | -1 | training            |
| TY01_PHYAZ  | 60  | RPPSWIPKXXXXXX | -1 | training            |
| TY26_PHYAZ  | 3   | XXXXKPPWRLXXX  | 1  | training            |
| TY26_PHYAZ  | 2   | XXXXXXKPPWRLXX | -1 | training            |
| ADIPO_MOUSE | 94  | MTGAEGPRGFPGT  | 1  | external validation |
| ADIPO_MOUSE | 14  | LFLILPSHAEDD   | -1 | external validation |

|             |     |                 |    |                     |
|-------------|-----|-----------------|----|---------------------|
| ADIPO_MOUSE | 29  | TTEELAPALVPPP   | -1 | external validation |
| ADIPO_MOUSE | 33  | LAPALVPPPKGTC   | -1 | external validation |
| ADIPO_MOUSE | 34  | APALVPPPKGTCA   | -1 | external validation |
| ADIPO_MOUSE | 35  | PALVPPPKGTCAG   | -1 | external validation |
| ADIPO_MOUSE | 79  | DAGLLGPKGETGD   | -1 | external validation |
| ADIPO_MOUSE | 107 | PGRKGEPEGAAAYV  | -1 | external validation |
| ADIPO_MOUSE | 129 | ETRVTVPNVPIRF   | -1 | external validation |
| ADIPO_MOUSE | 158 | KFYCNIPGLYYFS   | -1 | external validation |
| AGP4_ARATH  | 24  | SALAQAPAPTPTA   | 1  | external validation |
| AGP4_ARATH  | 26  | LAQAPAPTPTATP   | 1  | external validation |
| AGP4_ARATH  | 28  | QAPAPTPTATPPP   | 1  | external validation |
| AGP4_ARATH  | 32  | PTPTATPPPATPP   | 1  | external validation |
| AGP4_ARATH  | 33  | TPTATPPPATPPP   | 1  | external validation |
| AGP4_ARATH  | 34  | PTATPPPATPPPV   | 1  | external validation |
| AGP4_ARATH  | 37  | TPPATPPPVAATP   | 1  | external validation |
| AGP4_ARATH  | 38  | PPPATPPPVAATP   | 1  | external validation |
| AGP4_ARATH  | 39  | PPATPPPVAATPPP  | 1  | external validation |
| AGP4_ARATH  | 43  | PPPVAATPPPVAATP | -1 | external validation |
| AGP4_ARATH  | 44  | PPVAATPPPVAATP  | -1 | external validation |
| AGP4_ARATH  | 45  | PVAATPPPVAATPPP | -1 | external validation |
| AGP4_ARATH  | 49  | PPPVAATPPPAATP  | -1 | external validation |
| AGP4_ARATH  | 50  | PPVAATPPPAATPA  | -1 | external validation |
| AGP4_ARATH  | 51  | PVAATPPPAATPAP  | -1 | external validation |
| AGP4_ARATH  | 55  | PPPAATPAPATPP   | -1 | external validation |
| AGP4_ARATH  | 57  | PAATPAPATPPPA   | -1 | external validation |
| AGP4_ARATH  | 60  | TPAPATPPPAATP   | -1 | external validation |
| AGP4_ARATH  | 61  | PAPATPPPAATPA   | -1 | external validation |
| AGP4_ARATH  | 62  | APATPPPAATPAP   | -1 | external validation |
| AGP4_ARATH  | 66  | PPPAATPAPATTP   | -1 | external validation |
| AGP4_ARATH  | 68  | PAATPAPATTPPS   | -1 | external validation |
| AGP4_ARATH  | 72  | PAPATTPPSVAPS   | -1 | external validation |
| AGP4_ARATH  | 73  | APATTPPSVAPSP   | -1 | external validation |
| AGP4_ARATH  | 77  | TPPSVAPSPADVPT  | -1 | external validation |
| AGP4_ARATH  | 79  | PSVAPSPADVPTA   | -1 | external validation |
| AGP4_ARATH  | 83  | PSPADVPTASPPA   | -1 | external validation |
| AGP4_ARATH  | 87  | DVPTASPPAPEGP   | -1 | external validation |
| AGP4_ARATH  | 88  | VPTASPPAPEGPT   | -1 | external validation |
| AGP4_ARATH  | 90  | TASPPAPEGPTVS   | -1 | external validation |
| AGP4_ARATH  | 93  | PPAPEGPTVSPSS   | -1 | external validation |
| AGP4_ARATH  | 97  | EGPTVSPSSAPGP   | -1 | external validation |
| AGP4_ARATH  | 101 | VSPSSAPGPSDAS   | -1 | external validation |
| AGP4_ARATH  | 103 | PSSAPGPSDASPA   | -1 | external validation |
| AGP4_ARATH  | 108 | GPSDASPAPSAAF   | -1 | external validation |

|             |     |                |    |                     |
|-------------|-----|----------------|----|---------------------|
| AGP4_ARATH  | 110 | SDASPAPSAAFSN  | -1 | external validation |
| C1QA_HUMAN  | 39  | KGEAGRPGRRGRP  | 1  | external validation |
| C1QA_HUMAN  | 45  | PGRRGRPGLKGEQ  | 1  | external validation |
| C1QA_HUMAN  | 54  | KGEQGEPGAPGIR  | 1  | external validation |
| C1QA_HUMAN  | 57  | QGEPGAPGIRTGI  | 1  | external validation |
| C1QA_HUMAN  | 73  | KGDQGEPSGNP    | 1  | external validation |
| C1QA_HUMAN  | 79  | PGPSGNPGKVGYP  | 1  | external validation |
| C1QA_HUMAN  | 85  | PGKVGYPGSPGPL  | 1  | external validation |
| C1QA_HUMAN  | 4   | XXXMEGPRGWLVL  | -1 | external validation |
| C1QA_HUMAN  | 29  | EDLCRAPDGKKGE  | -1 | external validation |
| C1QA_HUMAN  | 75  | DQGEPSGNPGK    | -1 | external validation |
| C1QA_HUMAN  | 87  | KVGYPGSPGLGA   | -1 | external validation |
| C1QA_HUMAN  | 90  | YGPSGPLGARGI   | -1 | external validation |
| C1QA_HUMAN  | 97  | LGARGIPGIKGTK  | -1 | external validation |
| C1QA_HUMAN  | 106 | KGTKGSPGNKDQ   | -1 | external validation |
| C1QA_HUMAN  | 113 | GNIKDQPRPAFSA  | -1 | external validation |
| C1QA_HUMAN  | 115 | IKDQPRPAFSAIR  | -1 | external validation |
| C1QA_HUMAN  | 124 | SAIRRNPPMGGNV  | -1 | external validation |
| C1QA_HUMAN  | 125 | AIRRNPPMGGNVV  | -1 | external validation |
| C1QA_HUMAN  | 143 | ITNQEEPYNHSG   | -1 | external validation |
| C1QA_HUMAN  | 156 | RFVCTVPGYYYYFT | -1 | external validation |
| C1QA_HUMAN  | 221 | VWVEKDPKKGHIY  | -1 | external validation |
| C1QA_HUMAN  | 243 | SGFLIFPSAXXXX  | -1 | external validation |
| CA1B_CONRE  | 6   | XGCCSDPRCKHQC  | 1  | external validation |
| CA1D_CONCN  | 54  | NGRCCHPACGKHF  | 1  | external validation |
| CA1D_CONGE  | 16  | ACRVNNPHVCXXX  | 1  | external validation |
| CA1D_CONGE  | 9   | DECCSNPACRVNN  | -1 | external validation |
| CBW_CONRA   | 21  | FKTCCGPPGDWQC  | 1  | external validation |
| CBW_CONRA   | 22  | KTCCGPPGDWQCV  | 1  | external validation |
| CBW_CONRA   | 32  | QCVEACPXXXXXX  | -1 | external validation |
| CI1BB_CONRA | 2   | XXXXXXGPSFCKAN | 1  | external validation |
| CI1BB_CONRA | 11  | CKANGKPCSYHAD  | 1  | external validation |
| CI1BB_CONRA | 29  | LSGICKPSTNVIL  | 1  | external validation |
| CI1BB_CONRA | 36  | STNVILPGCSTSS  | -1 | external validation |
| CM3A_CONPU  | 57  | RLCCGFPKSCRSR  | 1  | external validation |
| CM3A_CONPU  | 67  | RSRQCKPHRCCGR  | 1  | external validation |
| CM3A_CONPU  | 16  | ICLLFPITALPM   | -1 | external validation |
| CM3A_CONPU  | 21  | FPITALPMDGDQP  | -1 | external validation |
| CM3A_CONPU  | 27  | PMDGDQPADRLAE  | -1 | external validation |
| CM3A_CONPU  | 45  | ISSEEHPFEKRQR  | -1 | external validation |
| CM3F_CONPU  | 2   | XXXXXXGPPCCLYG | 1  | external validation |
| CM3F_CONPU  | 3   | XXXXGPPCCLYGS  | 1  | external validation |
| CM3F_CONPU  | 14  | GSCRPFPGCYNAL  | 1  | external validation |

|             |     |                |    |                     |
|-------------|-----|----------------|----|---------------------|
| CM3F_CONPU  | 12  | LYGSCRPFPGCYN  | -1 | external validation |
| CO162_CONAH | 57  | RDECYPGTF CGI  | 1  | external validation |
| CO162_CONAH | 65  | TFCGIKPLCCSE   | 1  | external validation |
| CO162_CONAH | 34  | GLKNLFPKARHEM  | -1 | external validation |
| CO162_CONAH | 56  | KRDECYPGTF CG  | -1 | external validation |
| CO162_CONAH | 75  | CSERCFPFVCLSL  | -1 | external validation |
| CO1A1_TYREX | 15  | AGAPGFPGARGAP  | 1  | external validation |
| CO1A1_TYREX | 30  | QGPSGAPGPKXXX  | 1  | external validation |
| CO1A1_TYREX | 294 | XGVQGP PGQPR   | 1  | external validation |
| CO1A1_TYREX | 474 | XGSAGPPGATGFP  | 1  | external validation |
| CO1A1_TYREX | 480 | PGATGFPGAAGR X | 1  | external validation |
| CO1A1_TYREX | 567 | XGVVGLPGQRXXX  | 1  | external validation |
| CO1A1_TYREX | 21  | PGARGAPGPQGPS  | -1 | external validation |
| CO1A1_TYREX | 23  | ARGAPGPQGPSGA  | -1 | external validation |
| CO1A1_TYREX | 26  | APGPQGPSGAPGP  | -1 | external validation |
| CO1A1_TYREX | 32  | PSGAPGPKXXXXX  | -1 | external validation |
| CO1A1_TYREX | 293 | XXGVQGP PGQGP  | -1 | external validation |
| CO1A1_TYREX | 296 | VQGP PGQPRXX   | -1 | external validation |
| CO1A1_TYREX | 299 | PPGPQGP RXXXXX | -1 | external validation |
| CO1A1_TYREX | 473 | XXGSAGPPGATGF  | -1 | external validation |
| CO6A_CONTU  | 4   | XXXCLSPGSSCSP  | 1  | external validation |
| CO6A_CONTU  | 21  | CCRSCNPYSRKCX  | 1  | external validation |
| COC1A_CONCL | 65  | WCDQEAPHGNCCD  | 1  | external validation |
| COC1A_CONCL | 82  | TAAWWCPGTKWDX  | 1  | external validation |
| COC1A_CONCL | 15  | VLLLLLPYGDLIT  | -1 | external validation |
| COC1A_CONCL | 34  | AARKVTPWRRNLK  | -1 | external validation |
| CONO_CONTE  | 7   | CFIRNCPPXXXXX  | 1  | external validation |
| CONO_CONTE  | 8   | FIRNCPPXXXXX   | -1 | external validation |
| CWP15_PHAVU | 10  | PPDFANPF IIPQN | 1  | external validation |
| CWP15_PHAVU | 4   | XXXQNQP PDFANP | -1 | external validation |
| CWP15_PHAVU | 5   | XXQNQP PDFANPF | -1 | external validation |
| CWP15_PHAVU | 14  | ANPF IIPQNAAXX | -1 | external validation |
| FP1V1_PERVI | 65  | WKATPKPWTAWKA  | 1  | external validation |
| FP1V1_PERVI | 72  | WTAWKAPPPAWTA  | 1  | external validation |
| FP1V1_PERVI | 73  | TAWKAPPPAWTAW  | 1  | external validation |
| FP1V1_PERVI | 125 | WKATLKPWTAWKA  | 1  | external validation |
| FP1V1_PERVI | 202 | WTAWKAPPPAWSA  | 1  | external validation |
| FP1V1_PERVI | 203 | TAWKAPPPAWSAW  | 1  | external validation |
| FP1V1_PERVI | 345 | WKATPKPWTAWKV  | 1  | external validation |
| FP1V1_PERVI | 24  | ASAVYHPPSWTAW  | -1 | external validation |
| FP1V1_PERVI | 25  | SAVYHPPSWTAWI  | -1 | external validation |
| FP1V1_PERVI | 33  | WTAWIAPKPWTAW  | -1 | external validation |
| FP1V1_PERVI | 35  | AWIAPKPWTAWKV  | -1 | external validation |

|             |     |               |    |                     |
|-------------|-----|---------------|----|---------------------|
| FP1V1_PERVI | 44  | AWKVHPPAWTAWK | -1 | external validation |
| FP1V1_PERVI | 54  | AWKAHPPAWTAWK | -1 | external validation |
| FP1V1_PERVI | 63  | TAWKATPKPWTAW | -1 | external validation |
| FP1V1_PERVI | 74  | AWKAPPPAWTAWK | -1 | external validation |
| FP1V1_PERVI | 94  | AWKAPPPTWTAWK | -1 | external validation |
| FP1V1_PERVI | 173 | TAWKATPKPWTVW | -1 | external validation |
| FP1V1_PERVI | 183 | TVWKATPKPWTAW | -1 | external validation |
| FP1V1_PERVI | 204 | AWKAPPPAWSAWK | -1 | external validation |
| FP1V1_PERVI | 213 | SAWKATPKPWTVW | -1 | external validation |
| FP1V1_PERVI | 313 | SAWKATPKPWTAW | -1 | external validation |
| FP1V1_PERVI | 354 | AWKVPPPAWTAWK | -1 | external validation |
| FP1V1_PERVI | 443 | TAWRATPPPTWTA | -1 | external validation |
| FP1V1_PERVI | 444 | AWRATPPPTWTAW | -1 | external validation |
| FP1V1_PERVI | 445 | WRATPPPTWTAWH | -1 | external validation |
| FP1V1_PERVI | 461 | YGGYGKPGKPGKP | -1 | external validation |
| FP1V1_PERVI | 464 | YGKPGKPGKPGSK | -1 | external validation |
| FP1V1_PERVI | 467 | PGKPGKPGSKGPR | -1 | external validation |
| FP1V1_PERVI | 472 | KPGSKGPRGPAGP | -1 | external validation |
| FP1V1_PERVI | 475 | SKGPRGPAGPPGA | -1 | external validation |
| FP1V1_PERVI | 478 | PRGPAGPPGATGK | -1 | external validation |
| FP1V1_PERVI | 479 | RGPAGPPGATGKT | -1 | external validation |
| FP1V1_PERVI | 496 | ATGKRGGPGYPGK | -1 | external validation |
| FP1V1_PERVI | 497 | TGKRGGPGYPGKP | -1 | external validation |
| FP1V1_PERVI | 500 | RGPPGYPGKPGVP | -1 | external validation |
| FP1V1_PERVI | 503 | PGYPGKPGVPGRN | -1 | external validation |
| FP1V1_PERVI | 506 | PGKPGVPGRNGYV | -1 | external validation |
| FP1V1_PERVI | 557 | WTAWTAPPAYGXX | -1 | external validation |
| FP1V1_PERVI | 558 | TAWTAPPAYGXXX | -1 | external validation |
| KNG1_HUMAN  | 383 | SLMKRPPGFSPFR | 1  | external validation |
| KNG1_HUMAN  | 84  | IKEGDCPVQSGKT | -1 | external validation |
| KNG1_HUMAN  | 130 | QTCQITPAEGPVV | -1 | external validation |
| KNG1_HUMAN  | 134 | ITPAEGPVVTAQY | -1 | external validation |
| KNG1_HUMAN  | 148 | CLGCVHPISTQSP | -1 | external validation |
| KNG1_HUMAN  | 154 | PISTQSPDLEPIL | -1 | external validation |
| KNG1_HUMAN  | 158 | QSPDLEPILRHGI | -1 | external validation |
| KNG1_HUMAN  | 216 | NFLFLTPDCKSLW | -1 | external validation |
| KNG1_HUMAN  | 252 | QNCDIYPGKDFVQ | -1 | external validation |
| KNG1_HUMAN  | 259 | GKDFVQPPTKICV | -1 | external validation |
| KNG1_HUMAN  | 260 | KDFVQPPTKICVG | -1 | external validation |
| KNG1_HUMAN  | 268 | KICVGCPRDIPTN | -1 | external validation |
| KNG1_HUMAN  | 272 | GCPRDIPTNSPEL | -1 | external validation |
| KNG1_HUMAN  | 276 | DIPTNSPELEETL | -1 | external validation |
| KNG1_HUMAN  | 359 | AEVYVVPWEKKIY | -1 | external validation |

|             |     |                 |    |                     |
|-------------|-----|-----------------|----|---------------------|
| KNG1_HUMAN  | 366 | WEKKIYPTVNCQP   | -1 | external validation |
| KNG1_HUMAN  | 372 | PTVNCQPLGMISL   | -1 | external validation |
| KNG1_HUMAN  | 382 | ISLMKRPPGFSPF   | -1 | external validation |
| KNG1_HUMAN  | 387 | RPPGFSPFRSSRI   | -1 | external validation |
| KNG1_HUMAN  | 404 | EETTVSPHTSMA    | -1 | external validation |
| KNG1_HUMAN  | 405 | ETTVSPHTSMAP    | -1 | external validation |
| KNG1_HUMAN  | 411 | PHTSMAPAQDEER   | -1 | external validation |
| KNG1_HUMAN  | 534 | SEDSTTPSAQTQE   | -1 | external validation |
| KNG1_HUMAN  | 545 | QEKTEGPTPIPSL   | -1 | external validation |
| KNG1_HUMAN  | 547 | KTEGPTPIPSLAK   | -1 | external validation |
| KNG1_HUMAN  | 549 | EGPTPIPSLAKPG   | -1 | external validation |
| KNG1_HUMAN  | 554 | IPSLAKPGVTVTF   | -1 | external validation |
| KNG1_HUMAN  | 574 | LIATMMPPISPAP   | -1 | external validation |
| KNG1_HUMAN  | 575 | IATMMPPISPAPI   | -1 | external validation |
| KNG1_HUMAN  | 578 | MMPPISPAPIQSD   | -1 | external validation |
| KNG1_HUMAN  | 580 | PPISPAPIQSDDD   | -1 | external validation |
| KNG1_HUMAN  | 589 | SDDDWIPDIQIDP   | -1 | external validation |
| KNG1_HUMAN  | 595 | PDIQIDPNGLSFN   | -1 | external validation |
| KNG1_HUMAN  | 602 | NGLSFNPISDFPD   | -1 | external validation |
| KNG1_HUMAN  | 607 | NPISDFPDTTSPK   | -1 | external validation |
| KNG1_HUMAN  | 612 | FPDTTSPKCPGRP   | -1 | external validation |
| KNG1_HUMAN  | 615 | TTSPKCPGRPWKS   | -1 | external validation |
| KNG1_HUMAN  | 618 | PKCPGRPWKS SVSE | -1 | external validation |
| KNG1_HUMAN  | 627 | SVSEINPTTQMKE   | -1 | external validation |
| O226B_CONTE | 58  | WQYCESPSDCCSW   | 1  | external validation |
| RBL_CHLRE   | 104 | IAYVAYPIDLFEE   | 1  | external validation |
| RBL_CHLRE   | 151 | VKTFVGGPHGIQV   | 1  | external validation |
| RBL_CHLRE   | 3   | XXXXMVPQTETKA   | -1 | external validation |
| RBL_CHLRE   | 27  | RLTYYPDYVVRD    | -1 | external validation |
| RBL_CHLRE   | 44  | AAFRMTPQLGVPP   | -1 | external validation |
| RBL_CHLRE   | 49  | TPQLGVPPEECGA   | -1 | external validation |
| RBL_CHLRE   | 50  | PQLGVPPEECGAA   | -1 | external validation |
| RBL_CHLRE   | 89  | RCYDIEPVPGEDN   | -1 | external validation |
| RBL_CHLRE   | 91  | YDIEPVPGEDNQY   | -1 | external validation |
| RBL_CHLRE   | 141 | LEDLRIPPAYVKT   | -1 | external validation |
| RBL_CHLRE   | 142 | EDLRIPPAYVKT    | -1 | external validation |
| RBL_CHLRE   | 152 | KTFVGGPHGIQVE   | -1 | external validation |
| RBL_CHLRE   | 176 | LGCTIKPKLGLSA   | -1 | external validation |
| RBL_CHLRE   | 210 | ENVNSQPFMRWRD   | -1 | external validation |
| RBL_CHLRE   | 263 | AKELGVPIIMHDY   | -1 | external validation |
| RBL_CHLRE   | 372 | QDWCSMPGVMPVA   | -1 | external validation |
| RBL_CHLRE   | 376 | SMPGVMPVASGGI   | -1 | external validation |
| RBL_CHLRE   | 388 | IHVWHMPALVEIF   | -1 | external validation |



|           |     |               |    |                     |
|-----------|-----|---------------|----|---------------------|
| RBL_CHLRE | 410 | GGTLGHPWGNAPG | -1 | external validation |
| RBL_CHLRE | 415 | HPWGNAPGAAANR | -1 | external validation |
| RBL_CHLRE | 453 | SACKWSPELAAAC | -1 | external validation |

### Hydroxylysine

| Pro. ID     | Site | Frag.          | Class | Dataset  |
|-------------|------|----------------|-------|----------|
| ADIPO_HUMAN | 68   | PGEKGEKGDPLI   | 1     | training |
| ADIPO_HUMAN | 77   | PGLIGPKGDIGET  | 1     | training |
| ADIPO_HUMAN | 101  | PGIQGRKGEPGEG  | 1     | training |
| ADIPO_HUMAN | 134  | MPIRFTKIFYNQ   | -1    | training |
| ADIPO_HUMAN | 149  | YDGSTGKFHCNIP  | -1    | training |
| ADIPO_HUMAN | 169  | HITVYMKDVKVSL  | -1    | training |
| ADIPO_HUMAN | 172  | VYMKDVKVSLFKK  | -1    | training |
| ADIPO_HUMAN | 177  | VKVSFLFKKDKAML | -1    | training |
| ADIPO_HUMAN | 178  | KVSLFKKDKAMLF  | -1    | training |
| ADIPO_HUMAN | 180  | SLFKKDKAMLFTY  | -1    | training |
| ADIPO_MOUSE | 68   | DGTPGEKGEKGD   | 1     | training |
| ADIPO_MOUSE | 71   | PGEKGEKGDAGLL  | 1     | training |
| ADIPO_MOUSE | 80   | AGLLGPKGETGDV  | 1     | training |
| ADIPO_MOUSE | 104  | PGTPGRKGEPGEA  | 1     | training |
| ADIPO_MOUSE | 36   | ALVPPKGTGAGW   | -1    | training |
| ADIPO_MOUSE | 152  | YDGSTGKFYCNIP  | -1    | training |
| ADIPO_MOUSE | 180  | VKVSFLFKKDKAVL | -1    | training |
| ADIPO_MOUSE | 181  | KVSLFKKDKAVLF  | -1    | training |
| ADIPO_MOUSE | 183  | SLFKKDKAVLFTY  | -1    | training |
| ADIPO_MOUSE | 195  | YDQYQEKNDQAS   | -1    | training |
| C1QA_HUMAN  | 33   | RAPDGKKGEAGRP  | 1     | training |
| C1QA_HUMAN  | 48   | RGRPGLKGEQGE   | 1     | training |
| C1QA_HUMAN  | 67   | TGIQGLKGDQGE   | 1     | training |
| C1QA_HUMAN  | 100  | RGIPGIKGTGSP   | 1     | training |
| C1QA_HUMAN  | 32   | CRAPDGKKGEAGR  | -1    | training |
| C1QA_HUMAN  | 81   | PSGNPGKVGYPGP  | -1    | training |
| C1QA_HUMAN  | 103  | PGIKGTGSPGNI   | -1    | training |
| C1QA_HUMAN  | 110  | GSPGNIKDQPRPA  | -1    | training |
| C1QA_HUMAN  | 195  | FCDTTNKGLFQVV  | -1    | training |
| C1QA_HUMAN  | 219  | DQVWVEKDPKKGH  | -1    | training |
| C1QA_HUMAN  | 222  | WVEKDPKKGHIYQ  | -1    | training |
| C1QA_HUMAN  | 223  | VEKDPKKGHIYQG  | -1    | training |
| C1QB_HUMAN  | 59   | PGTPGIKGEKGLP  | 1     | training |
| C1QB_HUMAN  | 62   | PGIKGEKGLPGLA  | 1     | training |
| C1QB_HUMAN  | 77   | HGEFGEKGDGP    | 1     | training |
| C1QB_HUMAN  | 92   | PGKVGPKGPMGPK  | 1     | training |

|             |     |               |    |          |
|-------------|-----|---------------|----|----------|
| C1QB_HUMAN  | 98  | KGPMGPKGGPGAP | 1  | training |
| C1QB_HUMAN  | 110 | PGAPGPKGESGDY | 1  | training |
| C1QB_HUMAN  | 4   | XXXMMMkipWGSi | -1 | training |
| C1QB_HUMAN  | 88  | IPGNPGKVGPKGP | -1 | training |
| C1QB_HUMAN  | 117 | GESGDYKATQKIA | -1 | training |
| C1QB_HUMAN  | 121 | DYKATQKIAFSAT | -1 | training |
| C1QB_HUMAN  | 159 | YEPRSGKFTCKVP | -1 | training |
| C1QB_HUMAN  | 163 | SGKFTCKVPGLYY | -1 | training |
| C1QB_HUMAN  | 193 | GRERAQKVVTFCd | -1 | training |
| C1QB_HUMAN  | 215 | TGGMVLKLEQGEN | -1 | training |
| C1QB_HUMAN  | 229 | FLQATDKNSLLGM | -1 | training |
| C1QC_HUMAN  | 75  | RGPKGQKGEPGLP | 1  | training |
| C1QC_HUMAN  | 14  | LPHLGLKLLLLLL | -1 | training |
| C1QC_HUMAN  | 47  | LPGAPGKDGyDGL | -1 | training |
| C1QC_HUMAN  | 57  | DGLPGPKGEPGIP | -1 | training |
| C1QC_HUMAN  | 72  | PGIRGPKGQKGEP | -1 | training |
| C1QC_HUMAN  | 86  | LPGHPGKNGPMGP | -1 | training |
| C1QC_HUMAN  | 115 | GEEGRYKQKFQSV | -1 | training |
| C1QC_HUMAN  | 117 | EGRYKQKFQSVFT | -1 | training |
| C1QC_HUMAN  | 157 | YDTSTGKFTCKVP | -1 | training |
| C1QC_HUMAN  | 161 | TGKFTCKVPGLYY | -1 | training |
| C1QC_HUMAN  | 188 | LYRSGVKVVTFCG | -1 | training |
| C1QC_HUMAN  | 198 | FCGHTSKTNQVNS | -1 | training |
| C1QT9_MOUSE | 73  | DGIRGEKGEpGAD | 1  | training |
| C1QT9_MOUSE | 127 | QGQKGDkGEVGPT | 1  | training |
| C1QT9_MOUSE | 49  | DGRDGAKGDkGDA | -1 | training |
| C1QT9_MOUSE | 52  | DGAkGDkGDAGEP | -1 | training |
| C1QT9_MOUSE | 66  | HPGGPGkDGIRGE | -1 | training |
| C1QT9_MOUSE | 85  | DGRVEAKGIkGDP | -1 | training |
| C1QT9_MOUSE | 88  | VEAKGIkGDpGSR | -1 | training |
| C1QT9_MOUSE | 99  | SRGSPGkHGPKGS | -1 | training |
| C1QT9_MOUSE | 103 | PGkHGPKGSIGPT | -1 | training |
| C1QT9_MOUSE | 124 | TGPQgQkGDkGEV | -1 | training |
| C1QT9_MOUSE | 148 | TGPLGPKGLPGPM | -1 | training |
| C1QT9_MOUSE | 159 | PMGPIGkPGPRGE | -1 | training |
| C1QT9_MOUSE | 184 | RGMRGWkGDRGEK | -1 | training |
| C1QT9_MOUSE | 190 | KGDRGEkGkVGEA | -1 | training |
| C1QT9_MOUSE | 192 | DRGEkGkVGEAPL | -1 | training |
| C1QT9_MOUSE | 201 | EAPLVpKSAFTVG | -1 | training |
| C1QT9_MOUSE | 213 | GLTVISKFPpPDA | -1 | training |
| C1QT9_MOUSE | 222 | PPDAPIkFDKILY | -1 | training |
| C1QT9_MOUSE | 225 | APIkFDKILYNEL | -1 | training |
| C1QT9_MOUSE | 240 | YNVATGkFTCHVA | -1 | training |

|             |     |                |    |          |
|-------------|-----|----------------|----|----------|
| C1QT9_MOUSE | 268 | VQVSLVKNQVVKVL | -1 | training |
| C1QT9_MOUSE | 272 | LVKNGVKVLHTKD  | -1 | training |
| C1QT9_MOUSE | 277 | VKVLHTKDSYMSS  | -1 | training |
| C1QT9_MOUSE | 296 | GIVQELKLGDEVW  | -1 | training |
| CAFF_RIFPA  | 183 | PGTPGSKGDRGQS  | 1  | training |
| CAFF_RIFPA  | 342 | MGIPGEKGPSGEP  | 1  | training |
| CAFF_RIFPA  | 351 | SGEPGAKGPTGDT  | 1  | training |
| CAFF_RIFPA  | 546 | PGVAGAKGQGGPP  | 1  | training |
| CAFF_RIFPA  | 567 | PGERGPKGVGGSK  | 1  | training |
| CAFF_RIFPA  | 933 | KGEAGKGAAGDK   | 1  | training |
| CAFF_RIFPA  | 939 | KGAKGDKGWTGLP  | 1  | training |
| CAFF_RIFPA  | 50  | PMGPIGKRGPPGP  | -1 | training |
| CAFF_RIFPA  | 62  | PAGIAGKSGDDGR  | -1 | training |
| CAFF_RIFPA  | 113 | SKGEQGKSGNQGP  | -1 | training |
| CAFF_RIFPA  | 146 | ERGRDGKSGLPGL  | -1 | training |
| CAFF_RIFPA  | 299 | HAGEAGKRGSPGS  | -1 | training |
| CAFF_RIFPA  | 383 | SDGRPGKDGRPGI  | -1 | training |
| CAFF_RIFPA  | 392 | RPGIRGKDQGE    | -1 | training |
| CAFF_RIFPA  | 395 | IRGKDGKQGEQGP  | -1 | training |
| CAFF_RIFPA  | 425 | ARGEPGKNGAPGE  | -1 | training |
| CAFF_RIFPA  | 443 | EQDAGKDGETGA   | -1 | training |
| CAFF_RIFPA  | 488 | TPGEAGKTGERGA  | -1 | training |
| CAFF_RIFPA  | 584 | DIGPRGKAGERGK  | -1 | training |
| CAFF_RIFPA  | 590 | KAGERGKDGERGE  | -1 | training |
| CAFF_RIFPA  | 674 | TRGATGKQGARGP  | -1 | training |
| CAFF_RIFPA  | 686 | PRGLAGKRGLRGA  | -1 | training |
| CAFF_RIFPA  | 734 | PAGTAGKQGVKGA  | -1 | training |
| CAFF_RIFPA  | 749 | SPGLVGKQGDRGS  | -1 | training |
| CAFF_RIFPA  | 851 | QEGAPGKDGLPGL  | -1 | training |
| CAFF_RIFPA  | 986 | SQGPPGKDGQPGP  | -1 | training |
| CDA_CONDE   | 18  | NGWECKGYPCVN   | 1  | training |
| CDA_CONDE   | 25  | GYPCVNKACSGCT  | 1  | training |
| CDA_CONDE   | 34  | SGCTHGKXXXXXX  | -1 | training |
| CECB_BOMMO  | 47  | IRDGIVKAGPAIE  | 1  | training |
| CECB_BOMMO  | 5   | XXMNFKILSFVF   | -1 | training |
| CECB_BOMMO  | 29  | APEPRWKIFKKIE  | -1 | training |
| CECB_BOMMO  | 32  | PRWKIFKKIEKMG  | -1 | training |
| CECB_BOMMO  | 33  | RWKIFKKIEKMGR  | -1 | training |
| CECB_BOMMO  | 36  | IFKKIEKMGRNIR  | -1 | training |
| CECB_BOMMO  | 59  | EVLGSAKAIGKXX  | -1 | training |
| CECB_BOMMO  | 63  | SAKAIGKXXXXXX  | -1 | training |
| CECC_HELVI  | 21  | IRDGVKAAPAIE   | 1  | training |
| CECC_HELVI  | 3   | XXXXRWKVFKKIE  | -1 | training |

|             |      |               |    |          |
|-------------|------|---------------|----|----------|
| CECC_HELVI  | 6    | XRWKVFKKIEKMG | -1 | training |
| CECC_HELVI  | 7    | RWKVFKKIEKMGR | -1 | training |
| CECC_HELVI  | 10   | VFKKIEKMGRNIR | -1 | training |
| CECC_HELVI  | 33   | EVLGQAKXXXXXX | -1 | training |
| CO1A1_BOVIN | 264  | AGLPGMKGHRGFS | 1  | training |
| CO1A1_BOVIN | 54   | HDRDVWKPVPQI  | -1 | training |
| CO1A1_BOVIN | 79   | VICDELKDCPNAK | -1 | training |
| CO1A1_BOVIN | 85   | KDCPNAKVPTDEC | -1 | training |
| CO1A1_BOVIN | 114  | TGVEGPKGDTGPR | -1 | training |
| CO1A1_BOVIN | 170  | SYGYDEKSTGISV | -1 | training |
| CO1A1_BOVIN | 227  | PPGPPGKNGDDGE | -1 | training |
| CO1A1_BOVIN | 236  | DDGEAGKPGRPGE | -1 | training |
| CO1A1_BOVIN | 351  | PGAVGAKGEGGPQ | -1 | training |
| CO1A1_BOVIN | 396  | DGQPGAKGANGAP | -1 | training |
| CO1A1_BOVIN | 429  | SGPPGPKGNSGEP | -1 | training |
| CO1A1_BOVIN | 441  | PGAPGSKGDTGAK | -1 | training |
| CO1A1_BOVIN | 447  | KGDTGAKGEPGPT | -1 | training |
| CO1A1_BOVIN | 467  | PAGEEGKRGARGE | -1 | training |
| CO1A1_BOVIN | 504  | DGVAGPKGPAGER | -1 | training |
| CO1A1_BOVIN | 519  | PGPAGPKGSPGEA | -1 | training |
| CO1A1_BOVIN | 537  | AGLPGAKGLTGSP | -1 | training |
| CO1A1_BOVIN | 551  | SPGPDGKTGPPGP | -1 | training |
| CO1A1_BOVIN | 585  | MGFPGPKGAAGEP | -1 | training |
| CO1A1_BOVIN | 593  | AAGEPGKAGERGV | -1 | training |
| CO1A1_BOVIN | 611  | AVGPAGKDGEAGA | -1 | training |
| CO1A1_BOVIN | 656  | PPGEAGKPGEQGV | -1 | training |
| CO1A1_BOVIN | 741  | AGLPGPKGDRGDA | -1 | training |
| CO1A1_BOVIN | 750  | RGDAGPKGADGAP | -1 | training |
| CO1A1_BOVIN | 758  | ADGAPKDGVRGL  | -1 | training |
| CO1A1_BOVIN | 825  | DGQPGAKGEPGDA | -1 | training |
| CO1A1_BOVIN | 834  | PGDAGAKGDAGPP | -1 | training |
| CO1A1_BOVIN | 902  | PPGPAGKEGSKGP | -1 | training |
| CO1A1_BOVIN | 906  | AGKEGSKGPRGET | -1 | training |
| CO1A1_BOVIN | 983  | PSGEPGKQGPSGA | -1 | training |
| CO1A1_BOVIN | 1032 | DGSPGAKGDRGET | -1 | training |
| CO1A1_BOVIN | 1061 | PVGPAGKSGDRGE | -1 | training |
| CO1A1_BOVIN | 1151 | SAGSPGKDGLNGL | -1 | training |
| CO1A1_BOVIN | 1207 | PQPPQEKAHDGGR | -1 | training |
| CO1A1_BOVIN | 1235 | EVDTTLKSLSQI  | -1 | training |
| CO1A1_BOVIN | 1252 | SPEGSRKNPARTC | -1 | training |
| CO1A1_BOVIN | 1262 | RTCRDLKMCHSDW | -1 | training |
| CO1A1_BOVIN | 1269 | MCHSDWKSGEYWI | -1 | training |
| CO1A1_BOVIN | 1287 | CNLDAIKVFCNME | -1 | training |

|             |      |                |    |          |
|-------------|------|----------------|----|----------|
| CO1A1_BOVIN | 1309 | QPSVAQKNWYISK  | -1 | training |
| CO1A1_BOVIN | 1315 | KNWYISKNPKEKR  | -1 | training |
| CO1A1_BOVIN | 1318 | YISKNPKEKRHVW  | -1 | training |
| CO1A1_BOVIN | 1320 | SKNPKEKRHVWYG  | -1 | training |
| CO1A1_BOVIN | 1370 | NITYHCKNSVAYM  | -1 | training |
| CO1A1_BOVIN | 1384 | QQTGNLKKALLLQ  | -1 | training |
| CO1A1_BOVIN | 1385 | QTGNLKKALLLQG  | -1 | training |
| CO1A1_BOVIN | 1423 | HTGAWGKTVIEYK  | -1 | training |
| CO1A1_BOVIN | 1429 | KTVIEYKTTKTSR  | -1 | training |
| CO1A1_BOVIN | 1432 | IEYKTTKTSRLPI  | -1 | training |
| CO1A1_CHICK | 419  | SGAPGPKGNSGEP  | 1  | training |
| CO1A1_CHICK | 494  | DGIAGPKGPPGER  | 1  | training |
| CO1A1_CHICK | 740  | RGDPGPKGADGAP  | 1  | training |
| CO1A1_CHICK | 851  | VGAPGPKGARGSA  | 1  | training |
| CO1A1_CHICK | 1022 | DGAAGPKGDRGET  | 1  | training |
| CO1A1_CHICK | 1085 | QGPRGDKGETGEQ  | 1  | training |
| CO1A1_CHICK | 1097 | QGDRGMKGHRGFS  | 1  | training |
| CO1A1_CHICK | 43   | GLTYNDKDVWKPE  | -1 | training |
| CO1A1_CHICK | 47   | NDKDVWKPEPCQI  | -1 | training |
| CO1A1_CHICK | 107  | AGVEGPKGDTGPR  | -1 | training |
| CO1A1_CHICK | 160  | SYGYDEKSAGVAV  | -1 | training |
| CO1A1_CHICK | 217  | PAGPPGKNGDDGE  | -1 | training |
| CO1A1_CHICK | 226  | DDGEAGKPGRPGQ  | -1 | training |
| CO1A1_CHICK | 266  | SGLDGAKGQPGPA  | -1 | training |
| CO1A1_CHICK | 275  | PGPAGPKGEPGSP  | -1 | training |
| CO1A1_CHICK | 341  | PGAAGAKGETGPQ  | -1 | training |
| CO1A1_CHICK | 386  | DGQPGAKGATGAP  | -1 | training |
| CO1A1_CHICK | 431  | PGAPGNKGDTGAK  | -1 | training |
| CO1A1_CHICK | 437  | KGDTGAKGEPGPA  | -1 | training |
| CO1A1_CHICK | 509  | PGAVGPKGSPGEA  | -1 | training |
| CO1A1_CHICK | 583  | AAGEPGKPGERGA  | -1 | training |
| CO1A1_CHICK | 601  | AVGAAGKDGEAGA  | -1 | training |
| CO1A1_CHICK | 698  | PGNDGAKGDAGAP  | -1 | training |
| CO1A1_CHICK | 731  | AGLPGAKGDRGDP  | -1 | training |
| CO1A1_CHICK | 748  | ADGAPGKDGLRGL  | -1 | training |
| CO1A1_CHICK | 770  | AGAPGDKGEAGPP  | -1 | training |
| CO1A1_CHICK | 815  | DGQPGAKGETGDA  | -1 | training |
| CO1A1_CHICK | 824  | TGDAGAKGDAGPP  | -1 | training |
| CO1A1_CHICK | 923  | PGPPGEEKGSPGAD | -1 | training |
| CO1A1_CHICK | 1051 | PVGPAGKNGDRGE  | -1 | training |
| CO1A1_CHICK | 1141 | SAGAAGKDGLNGL  | -1 | training |
| CO1A1_CHICK | 1242 | SPEGTRKNPARTC  | -1 | training |
| CO1A1_CHICK | 1252 | RTCRDLKMCHGDW  | -1 | training |

|             |      |                |    |          |
|-------------|------|----------------|----|----------|
| CO1A1_CHICK | 1259 | MCHGDWKSGEYWI  | -1 | training |
| CO1A1_CHICK | 1277 | CNLDAIKVYCNE   | -1 | training |
| CO1A1_CHICK | 1299 | QATIAQKNWYLSK  | -1 | training |
| CO1A1_CHICK | 1305 | KNWYLSKNPKEKK  | -1 | training |
| CO1A1_CHICK | 1308 | YLSKNPKEKKHVW  | -1 | training |
| CO1A1_CHICK | 1310 | SKNPKEKKHVWFG  | -1 | training |
| CO1A1_CHICK | 1311 | KNPKEKKHVWFG   | -1 | training |
| CO1A1_CHICK | 1360 | NVTYHCKNSVAYM  | -1 | training |
| CO1A1_CHICK | 1374 | HDTGNLKKALLLQ  | -1 | training |
| CO1A1_CHICK | 1375 | DTGNLKKALLLQG  | -1 | training |
| CO1A1_HUMAN | 54   | HDRDVWKPEPCRI  | -1 | training |
| CO1A1_HUMAN | 67   | CVCDNGKVLCDVV  | -1 | training |
| CO1A1_HUMAN | 79   | VICDETKNCPGAE  | -1 | training |
| CO1A1_HUMAN | 170  | SYGYDEKSTGGIS  | -1 | training |
| CO1A1_HUMAN | 277  | SGLDGAKGDAGPA  | -1 | training |
| CO1A1_HUMAN | 286  | AGPAGPKGEPGSP  | -1 | training |
| CO1A1_HUMAN | 352  | PGAAGAKGEAGPQ  | -1 | training |
| CO1A1_HUMAN | 430  | GGPPGPKGNSGEP  | -1 | training |
| CO1A1_HUMAN | 448  | KGDTGAKGEPGPV  | -1 | training |
| CO1A1_HUMAN | 751  | RGDAGPKGADGSP  | -1 | training |
| CO1A1_HUMAN | 759  | ADGSPKDGVRGL   | -1 | training |
| CO1A1_HUMAN | 781  | AGAPGDKGESGPS  | -1 | training |
| CO1A1_HUMAN | 862  | VGAPGAKGARGSA  | -1 | training |
| CO1A1_HUMAN | 903  | PPGPAGKEGGKGP  | -1 | training |
| CO1A1_HUMAN | 907  | AGKEGGKGRGET   | -1 | training |
| CO1A1_HUMAN | 934  | PGPAGEKGSFGAD  | -1 | training |
| CO1A1_HUMAN | 1152 | SAGAPGKDGLNGL  | -1 | training |
| CO1A1_HUMAN | 1316 | KNWYISKNPKDKR  | -1 | training |
| CO1A1_HUMAN | 1319 | YISKNPKDKRHVW  | -1 | training |
| CO1A1_HUMAN | 1321 | SKNPDKDKRHVWFG | -1 | training |
| CO1A1_RAT   | 45   | PNGETWKPDPVCLI | -1 | training |
| CO1A1_RAT   | 67   | CDGVLCKEDLDCP  | -1 | training |
| CO1A1_RAT   | 77   | DCPNPQKREGECC  | -1 | training |
| CO1A1_RAT   | 104  | IGVEGPKGDPGPQ  | -1 | training |
| CO1A1_RAT   | 160  | SYGYDEKSAGVSV  | -1 | training |
| CO1A1_RAT   | 266  | SGLDGAKGDTGPA  | -1 | training |
| CO1A1_RAT   | 275  | TGPAGPKGEPGSP  | -1 | training |
| CO1A1_RAT   | 341  | PGAAGAKGEAGPQ  | -1 | training |
| CO1A1_RAT   | 583  | TAGEPGKAGERGV  | -1 | training |
| CO1A1_RAT   | 770  | AGAPGDKGETGPS  | -1 | training |
| CO1A1_RAT   | 815  | DGQPGAKGEPGDT  | -1 | training |
| CO1A1_RAT   | 824  | PGDTGVKGDAGPP  | -1 | training |
| CO1A1_RAT   | 851  | VGAPGPKGSRGAA  | -1 | training |

|             |      |               |    |          |
|-------------|------|---------------|----|----------|
| CO1A1_RAT   | 892  | PPGPVGKEGGKGP | -1 | training |
| CO1A1_RAT   | 896  | VGKEGGKGPRGET | -1 | training |
| CO1A1_RAT   | 1022 | DGAPGAKGDRGET | -1 | training |
| CO1A1_RAT   | 1097 | QGDRGIKGHRGFS | -1 | training |
| CO1A1_RAT   | 1197 | PQPPQEKSQDGGR | -1 | training |
| CO1A1_RAT   | 1299 | QPSVPQKNWYISP | -1 | training |
| CO1A1_RAT   | 1308 | YISPNPKEKKHVW | -1 | training |
| CO1A1_RAT   | 1310 | SPNPKEKKHVWFG | -1 | training |
| CO1A1_RAT   | 1311 | PNPKEKKHVWFGE | -1 | training |
| CO1A1_RAT   | 1374 | QQTGNLKKSLLLQ | -1 | training |
| CO1A1_RAT   | 1375 | QTGNLKKSLLLQG | -1 | training |
| CO1A1_RAT   | 1413 | HTGTWGKTVIEYK | -1 | training |
| CO2A1_BOVIN | 287  | PGLPGVKGHRGYP | 1  | training |
| CO2A1_BOVIN | 299  | PGLDGAKGEAGAP | 1  | training |
| CO2A1_BOVIN | 308  | AGAPGVKGESGSP | 1  | training |
| CO2A1_BOVIN | 374  | PGAPGAKGEAGPT | 1  | training |
| CO2A1_BOVIN | 419  | DGIPGAKGSAGAP | 1  | training |
| CO2A1_BOVIN | 452  | TGPLGPKGQTGEP | 1  | training |
| CO2A1_BOVIN | 464  | PGIAGFKGEQGPK | 1  | training |
| CO2A1_BOVIN | 470  | KGEQGPKGEPGPA | 1  | training |
| CO2A1_BOVIN | 527  | DGLAGPKGAPGER | 1  | training |
| CO2A1_BOVIN | 542  | SGLAGPKGANGDP | 1  | training |
| CO2A1_BOVIN | 608  | MGFPGPKGANGEP | 1  | training |
| CO2A1_BOVIN | 620  | PGKAGEKGLPGAP | 1  | training |
| CO2A1_BOVIN | 30   | HGQDVQKAGSCVQ | -1 | training |
| CO2A1_BOVIN | 44   | GQRYNDKDVWKPE | -1 | training |
| CO2A1_BOVIN | 48   | NDKDVWKPEPCRI | -1 | training |
| CO2A1_BOVIN | 73   | IICEDMKDCLSPE | -1 | training |
| CO2A1_BOVIN | 103  | SGQPGPKGQKGEP | -1 | training |
| CO2A1_BOVIN | 106  | PGPKGQKGEPGDI | -1 | training |
| CO2A1_BOVIN | 113  | GEPGDIKDIVGPK | -1 | training |
| CO2A1_BOVIN | 119  | KDIVGPKGPPGPQ | -1 | training |
| CO2A1_BOVIN | 140  | RGDRGDKGEKGAP | -1 | training |
| CO2A1_BOVIN | 143  | RGDKGEKGAPGPR | -1 | training |
| CO2A1_BOVIN | 250  | PPGPPGKPGDDGE | -1 | training |
| CO2A1_BOVIN | 259  | DDGEAGKPGKSGE | -1 | training |
| CO2A1_BOVIN | 262  | EAGKPGKSGERGP | -1 | training |
| CO2A1_BOVIN | 574  | DAGPQGKVGPSGA | -1 | training |
| CO2A1_BOVIN | 616  | ANGEPGKAGEKGL | -1 | training |
| CO2A1_BOVIN | 634  | LRGLPGKDGETGA | -1 | training |
| CO2A1_BOVIN | 679  | PPGEGGKPGDQGV | -1 | training |
| CO2A1_BOVIN | 731  | PGTDGPKGAAGPA | -1 | training |
| CO2A1_BOVIN | 764  | AGIAGPKGDRGDV | -1 | training |

|             |      |                 |    |          |
|-------------|------|-----------------|----|----------|
| CO2A1_BOVIN | 773  | RGDVGEKGPEGAP   | -1 | training |
| CO2A1_BOVIN | 781  | PEGAPGKDGGRGL   | -1 | training |
| CO2A1_BOVIN | 803  | AGANGEKGEVGPP   | -1 | training |
| CO2A1_BOVIN | 848  | DGQPGAKGEQGEA   | -1 | training |
| CO2A1_BOVIN | 857  | QGEAGQKGDAGAP   | -1 | training |
| CO2A1_BOVIN | 884  | TGVTGPKGARGAQ   | -1 | training |
| CO2A1_BOVIN | 925  | PPGPSGKDGPKGA   | -1 | training |
| CO2A1_BOVIN | 929  | SGKDGPKGARGDS   | -1 | training |
| CO2A1_BOVIN | 956  | AGPPGEKGEPGDD   | -1 | training |
| CO2A1_BOVIN | 1006 | PSGEPGKQGAPGA   | -1 | training |
| CO2A1_BOVIN | 1055 | DGAAGVKGDRGET   | -1 | training |
| CO2A1_BOVIN | 1084 | PAGPIGKQGDRGE   | -1 | training |
| CO2A1_BOVIN | 1118 | QGPRGDKGETGEA   | -1 | training |
| CO2A1_BOVIN | 1174 | PVGPSGKDGANGI   | -1 | training |
| CO2A1_BOVIN | 1231 | GLGQREKGPDPDPLQ | -1 | training |
| CO2A1_BOVIN | 1260 | EVDATLKSLNNQI   | -1 | training |
| CO2A1_BOVIN | 1287 | RTCRLKLCHEPW    | -1 | training |
| CO2A1_BOVIN | 1294 | LCHPEWKS GDYWI  | -1 | training |
| CO2A1_BOVIN | 1312 | CTLDAMKVFCNME   | -1 | training |
| CO2A1_BOVIN | 1333 | NPASVPKKNWWSS   | -1 | training |
| CO2A1_BOVIN | 1334 | PASVPKKNWWSSK   | -1 | training |
| CO2A1_BOVIN | 1340 | KNWWSSKSKDKKH   | -1 | training |
| CO2A1_BOVIN | 1342 | WWSSKSKDKKHIW   | -1 | training |
| CO2A1_BOVIN | 1344 | SSKSKDKKHIWFG   | -1 | training |
| CO2A1_BOVIN | 1345 | SKSKDKKHIWFG    | -1 | training |
| CO2A1_BOVIN | 1394 | NITYHCKNSIAYL   | -1 | training |
| CO2A1_BOVIN | 1408 | EAAGNLKKALLIQ   | -1 | training |
| CO2A1_BOVIN | 1409 | AAGNLKKALLIQG   | -1 | training |
| CO2A1_BOVIN | 1435 | FTYTVLKD GCTKH  | -1 | training |
| CO2A1_BOVIN | 1440 | LKD GCTKHTGKWG  | -1 | training |
| CO2A1_BOVIN | 1444 | CTKHTGKWGKTMI   | -1 | training |
| CO2A1_BOVIN | 1447 | HTGKWGKTMI EYR  | -1 | training |
| CO2A1_BOVIN | 1456 | IEYRSQKTSRLPI   | -1 | training |
| CO3A1_BOVIN | 95   | PGPPGMKGPAGMP   | 1  | training |
| CO3A1_BOVIN | 107  | PGFPGMKGHRGFD   | 1  | training |
| CO3A1_BOVIN | 119  | DGRNGEKGEPGAP   | 1  | training |
| CO3A1_BOVIN | 938  | QGPRGDKGETGER   | 1  | training |
| CO3A1_BOVIN | 950  | RGAMGIKGHRGFP   | 1  | training |
| CO3A1_BOVIN | 8    | YEAYDVKSGVAGG   | -1 | training |
| CO3A1_BOVIN | 73   | AIGPSGKDGESGR   | -1 | training |
| CO3A1_BOVIN | 128  | PGAPGLKGENGVP   | -1 | training |
| CO3A1_BOVIN | 194  | PGSPGAKGEVGPA   | -1 | training |
| CO3A1_BOVIN | 239  | DGSPGGKGEMGPA   | -1 | training |



|             |      |                |    |          |
|-------------|------|----------------|----|----------|
| CO3A1_BOVIN | 280  | AAGEPGKNGAKGD  | -1 | training |
| CO3A1_BOVIN | 284  | PGKNGAKGDPGPR  | -1 | training |
| CO3A1_BOVIN | 305  | PGIAGPKGEDGKD  | -1 | training |
| CO3A1_BOVIN | 310  | PKGEDGKDGSPGE  | -1 | training |
| CO3A1_BOVIN | 347  | NGLPGEKGPPEGDR | -1 | training |
| CO3A1_BOVIN | 394  | GPGSNGKPGPPGS  | -1 | training |
| CO3A1_BOVIN | 428  | MGFPGPKGNDGAP  | -1 | training |
| CO3A1_BOVIN | 436  | NDGAPGKNGERGG  | -1 | training |
| CO3A1_BOVIN | 454  | PQGPAGKNGETGP  | -1 | training |
| CO3A1_BOVIN | 473  | TGPSGDKGDTGPP  | -1 | training |
| CO3A1_BOVIN | 499  | PPGENGKPGEPGP  | -1 | training |
| CO3A1_BOVIN | 506  | PGEPGPKGEAGAP  | -1 | training |
| CO3A1_BOVIN | 518  | PGIPGGKGDGSGAP | -1 | training |
| CO3A1_BOVIN | 551  | PGPEGGKGAAGPP  | -1 | training |
| CO3A1_BOVIN | 584  | PGGPGPKGDKGEP  | -1 | training |
| CO3A1_BOVIN | 587  | PGPKGDKGEPGSS  | -1 | training |
| CO3A1_BOVIN | 601  | VDGAPGKDGPRGP  | -1 | training |
| CO3A1_BOVIN | 623  | AGQPGDKGESGAP  | -1 | training |
| CO3A1_BOVIN | 668  | NGEPGAKGERGAP  | -1 | training |
| CO3A1_BOVIN | 677  | RGAPGEKGEPP    | -1 | training |
| CO3A1_BOVIN | 745  | SSGAPGKDGPPGP  | -1 | training |
| CO3A1_BOVIN | 767  | PGISGPKGDSGPP  | -1 | training |
| CO3A1_BOVIN | 821  | PGPQGIKGENGKP  | -1 | training |
| CO3A1_BOVIN | 826  | IKGENGKPGPSGQ  | -1 | training |
| CO3A1_BOVIN | 875  | DGAPGAKGDRGEN  | -1 | training |
| CO3A1_BOVIN | 994  | PSGPPGKDGASGH  | -1 | training |
| CO3A1_HUMAN | 284  | TGAPGLKGENGLP  | 1  | training |
| CO3A1_HUMAN | 860  | PGPQGVKGERGSP  | 1  | training |
| CO3A1_HUMAN | 977  | PGPQGVKGESGKP  | 1  | training |
| CO3A1_HUMAN | 1106 | RGAAGIKGHRGFP  | 1  | training |
| CO3A1_HUMAN | 7    | MMSFVQKGSWLLL  | -1 | training |
| CO3A1_HUMAN | 46   | ADRDVWKPEPCQI  | -1 | training |
| CO3A1_HUMAN | 108  | QGPQGPKGDPGPP  | -1 | training |
| CO3A1_HUMAN | 161  | YDSYDVKSGVAVG  | -1 | training |
| CO3A1_HUMAN | 229  | PSGPAGKDGESGR  | -1 | training |
| CO3A1_HUMAN | 251  | PGPPGIKGPAGIP  | -1 | training |
| CO3A1_HUMAN | 275  | DGRNGEKGETGAP  | -1 | training |
| CO3A1_HUMAN | 395  | NGSPGGKGEMGPA  | -1 | training |
| CO3A1_HUMAN | 436  | GAGEPGKNGAKGE  | -1 | training |
| CO3A1_HUMAN | 440  | PGKNGAKGEPGPR  | -1 | training |
| CO3A1_HUMAN | 461  | PGVPGAKGEDGKD  | -1 | training |
| CO3A1_HUMAN | 466  | AKGEDGKDGSPGE  | -1 | training |
| CO3A1_HUMAN | 503  | NGIPGEKGPAGER  | -1 | training |

|             |      |               |    |          |
|-------------|------|---------------|----|----------|
| CO3A1_HUMAN | 550  | GPGSDGKPGPPGS | -1 | training |
| CO3A1_HUMAN | 610  | PQGPPGKNGETGP | -1 | training |
| CO3A1_HUMAN | 629  | TGPGGDKGDTGPP | -1 | training |
| CO3A1_HUMAN | 662  | PGEPGPKGDAGAP | -1 | training |
| CO3A1_HUMAN | 674  | PGAPGGKGDAGAP | -1 | training |
| CO3A1_HUMAN | 740  | LGSPGPKGDKGEP | -1 | training |
| CO3A1_HUMAN | 743  | PGPKGDKGEPGGP | -1 | training |
| CO3A1_HUMAN | 757  | ADGVPGKDGPRGP | -1 | training |
| CO3A1_HUMAN | 779  | AGQPGDKGEGGAP | -1 | training |
| CO3A1_HUMAN | 824  | NGEPGGKGERGAP | -1 | training |
| CO3A1_HUMAN | 901  | PSGSPGKDGPPGP | -1 | training |
| CO3A1_HUMAN | 923  | PGVSGPKGDAGQP | -1 | training |
| CO3A1_HUMAN | 932  | AGQPGEKGSPPAQ | -1 | training |
| CO3A1_HUMAN | 982  | VKGESGKPGANGL | -1 | training |
| CO3A1_HUMAN | 1031 | DGSPGGKGDRCEN | -1 | training |
| CO3A1_HUMAN | 1150 | PSGPPGKDGTSQH | -1 | training |
| CO3A1_HUMAN | 1212 | AGIGGEKAGGFAP | -1 | training |
| CO3A1_HUMAN | 1228 | DEPMDFKINTDEI | -1 | training |
| CO3A1_HUMAN | 1239 | EIMTSLKSVNGQI | -1 | training |
| CO3A1_HUMAN | 1256 | SPDGSRKNPARNC | -1 | training |
| CO3A1_HUMAN | 1266 | RNCRDLKFCHPEL | -1 | training |
| CO3A1_HUMAN | 1273 | FCHPELKSGEYWV | -1 | training |
| CO3A1_HUMAN | 1286 | DPNQGCKLDAIKV | -1 | training |
| CO3A1_HUMAN | 1291 | CKLDAIKVFCNME | -1 | training |
| CO3A1_HUMAN | 1313 | PLNVPRKHWWTDS | -1 | training |
| CO3A1_HUMAN | 1323 | TDSSAEKKHVWFG | -1 | training |
| CO3A1_HUMAN | 1324 | DSSAEKKHVWFG  | -1 | training |
| CO3A1_HUMAN | 1373 | NITYHCKNSIAYM | -1 | training |
| CO3A1_HUMAN | 1387 | QASGNVKKALKLM | -1 | training |
| CO3A1_HUMAN | 1388 | ASGNVKKALKLMG | -1 | training |
| CO3A1_HUMAN | 1391 | NVKKALKLMGSNE | -1 | training |
| CO3A1_HUMAN | 1401 | SNEGEFKAEGNSK | -1 | training |
| CO3A1_HUMAN | 1407 | KAEGNSKFTYTVL | -1 | training |
| CO3A1_HUMAN | 1419 | LEDGCTKHTGEWS | -1 | training |
| CO3A1_HUMAN | 1426 | HTGEWSKTVFEYR | -1 | training |
| CO3A1_HUMAN | 1435 | FEYRTRKAVRLPI | -1 | training |
| CO5A1_HUMAN | 627  | PGQTGPKGDRGFD | 1  | training |
| CO5A1_HUMAN | 642  | AGLPGEKGHRGDP | 1  | training |
| CO5A1_HUMAN | 708  | DGQPGPKGNVGPQ | 1  | training |
| CO5A1_HUMAN | 744  | IGPPGEKGPLGKP | 1  | training |
| CO5A1_HUMAN | 774  | EGPPGEKGGQGP  | 1  | training |
| CO5A1_HUMAN | 795  | PGPRGVKGADGIR | 1  | training |
| CO5A1_HUMAN | 804  | DGIRGLKGTKGEK | 1  | training |

|             |     |               |    |          |
|-------------|-----|---------------|----|----------|
| CO5A1_HUMAN | 807 | RGLKGTKGEGED  | 1  | training |
| CO5A1_HUMAN | 810 | KGTKGEGEDGFP  | 1  | training |
| CO5A1_HUMAN | 819 | DGFPGFKGDMGIK | 1  | training |
| CO5A1_HUMAN | 846 | DGPEGPKGRGGPN | 1  | training |
| CO5A1_HUMAN | 864 | LGPPGEGKGLGVP | 1  | training |
| CO5A1_HUMAN | 882 | PGRQGPKGSIGFP | 1  | training |
| CO5A1_HUMAN | 897 | PGANGEKGGRGTP | 1  | training |
| CO5A1_HUMAN | 8   | DVHTRWKARSALR | -1 | training |
| CO5A1_HUMAN | 44  | QPADLLKVLDFHN | -1 | training |
| CO5A1_HUMAN | 57  | LPDGITKTTGFC  | -1 | training |
| CO5A1_HUMAN | 69  | ATTRSSKGPVAY  | -1 | training |
| CO5A1_HUMAN | 79  | VAYRVTKDAQLSA | -1 | training |
| CO5A1_HUMAN | 88  | QLSAPTKQLYPAS | -1 | training |
| CO5A1_HUMAN | 107 | SILTTVKAKKGSQ | -1 | training |
| CO5A1_HUMAN | 109 | LTTVKAKKGSQAF | -1 | training |
| CO5A1_HUMAN | 110 | TTVKAKKGSQAF  | -1 | training |
| CO5A1_HUMAN | 146 | YEDHTGKPGPEDY | -1 | training |
| CO5A1_HUMAN | 164 | INLSDGKWHRIAL | -1 | training |
| CO5A1_HUMAN | 174 | IALSVHKKNVTLI | -1 | training |
| CO5A1_HUMAN | 175 | ALSVHKKNVTLIL | -1 | training |
| CO5A1_HUMAN | 184 | TLILDCKKKTKF  | -1 | training |
| CO5A1_HUMAN | 185 | LILDCKKKTKFL  | -1 | training |
| CO5A1_HUMAN | 186 | ILDCKKKTKFLD  | -1 | training |
| CO5A1_HUMAN | 189 | CKKTKTKFLDRSD | -1 | training |
| CO5A1_HUMAN | 288 | DPEDLGKEPTPSK | -1 | training |
| CO5A1_HUMAN | 294 | KEPTPSKKPVEAA | -1 | training |
| CO5A1_HUMAN | 295 | EPTPSKKPVEAAK | -1 | training |
| CO5A1_HUMAN | 301 | KPVEAAKETTEVP | -1 | training |
| CO5A1_HUMAN | 329 | TSEGAGKEEDVGI | -1 | training |
| CO5A1_HUMAN | 452 | GGPRGEGKQKGE  | -1 | training |
| CO5A1_HUMAN | 455 | RGEGKQKGEPAII | -1 | training |
| CO5A1_HUMAN | 535 | GGDAGSKGPMVSA | -1 | training |
| CO5A1_HUMAN | 582 | PGSGGLKGEPGDV | -1 | training |
| CO5A1_HUMAN | 605 | PPGPAGKPGRRGR | -1 | training |
| CO5A1_HUMAN | 687 | RGLLGPKGPPGPP | -1 | training |
| CO5A1_HUMAN | 749 | EKGPLGKPLPGM  | -1 | training |
| CO5A1_HUMAN | 767 | PPGHPGKEGPPGE | -1 | training |
| CO5A1_HUMAN | 825 | KGDMGIKGDRGEI | -1 | training |
| CO5A1_HUMAN | 866 | PPGEGKGLGVPGL | -1 | training |
| CO5A1_HUMAN | 905 | GRGTPGKPGPRGQ | -1 | training |
| CO5A1_HUMAN | 929 | PRGITGKPGPKGN | -1 | training |
| CO5A1_HUMAN | 933 | TGKPGPKGNSGGD | -1 | training |
| CO5A1_HUMAN | 963 | TGFPGPKGPPGPP | -1 | training |

|             |      |               |    |          |
|-------------|------|---------------|----|----------|
| CO5A1_HUMAN | 971  | PPGPPGKDGLPGH | -1 | training |
| CO5A1_HUMAN | 989  | ETGFQGKTGPPGP | -1 | training |
| CO5A1_HUMAN | 1034 | LPGLAGKEGTKGD | -1 | training |
| CO5A1_HUMAN | 1038 | AGKEGTKGDPGPA | -1 | training |
| CO5A1_HUMAN | 1049 | PAGLPGKDGPPGL | -1 | training |
| CO5A1_HUMAN | 1074 | VGALGLKGNEGPP | -1 | training |
| CO5A1_HUMAN | 1119 | PGPAGEKGAPGEK | -1 | training |
| CO5A1_HUMAN | 1125 | KGAPGEKGPQGPA | -1 | training |
| CO5A1_HUMAN | 1158 | PGEDGDKGEIGEP | -1 | training |
| CO5A1_HUMAN | 1167 | IGEPGQKGSKGDK | -1 | training |
| CO5A1_HUMAN | 1170 | PGQKGSKGDKGEQ | -1 | training |
| CO5A1_HUMAN | 1173 | KGSKGDKGEQGP  | -1 | training |
| CO5A1_HUMAN | 1212 | QGLFGQKGDEGPR | -1 | training |
| CO5A1_HUMAN | 1239 | PGPPGEKGETGDV | -1 | training |
| CO5A1_HUMAN | 1284 | PGAVGEKGEPGEA | -1 | training |
| CO5A1_HUMAN | 1305 | GGPPGPKGERGEK | -1 | training |
| CO5A1_HUMAN | 1311 | KGERGEKGESGPS | -1 | training |
| CO5A1_HUMAN | 1326 | AGPPGPKGPPGDD | -1 | training |
| CO5A1_HUMAN | 1335 | PGDDGPKGSPGPV | -1 | training |
| CO5A1_HUMAN | 1365 | DGPPGDKGDDGEP | -1 | training |
| CO5A1_HUMAN | 1391 | PSGPPGKRGPPGP | -1 | training |
| CO5A1_HUMAN | 1407 | EGRQGEKGAKGEA | -1 | training |
| CO5A1_HUMAN | 1410 | QGEKGAKGEAGLE | -1 | training |
| CO5A1_HUMAN | 1421 | LEGPPGKTGPIGP | -1 | training |
| CO5A1_HUMAN | 1433 | PQGAPGKPGPDGL | -1 | training |
| CO5A1_HUMAN | 1473 | PGLPGLKGDSGPK | -1 | training |
| CO5A1_HUMAN | 1479 | KGDSGPKGEKGHP | -1 | training |
| CO5A1_HUMAN | 1482 | SGPKGEKGHPGLI | -1 | training |
| CO5A1_HUMAN | 1500 | PGEQGEKGDRGLP | -1 | training |
| CO5A1_HUMAN | 1515 | QGSSGPKGEQGIT | -1 | training |
| CO5A1_HUMAN | 1542 | PGPPGPKGAKGSS | -1 | training |
| CO5A1_HUMAN | 1545 | PGPKGAKGSSGPT | -1 | training |
| CO5A1_HUMAN | 1554 | SGPTGPKGEAGHP | -1 | training |
| CO5A1_HUMAN | 1619 | GSLNSLKEIEQM  | -1 | training |
| CO5A1_HUMAN | 1626 | LEIEQMKRPLGTQ | -1 | training |
| CO5A1_HUMAN | 1640 | NPARTCKDLQLCH | -1 | training |
| CO5A1_HUMAN | 1668 | CSRDSFKVYCNFT | -1 | training |
| CO5A1_HUMAN | 1685 | TCVFPDKKSEGAR | -1 | training |
| CO5A1_HUMAN | 1686 | CVFPDKKSEGARI | -1 | training |
| CO5A1_HUMAN | 1697 | RITSWPKENPGSW | -1 | training |
| CO5A1_HUMAN | 1708 | SWFSEFKRGKLLS | -1 | training |
| CO5A1_HUMAN | 1711 | SEFKRGKLLSYVD | -1 | training |
| CO5A1_HUMAN | 1762 | ATGSYDKALRFLG | -1 | training |

|             |      |                |    |          |
|-------------|------|----------------|----|----------|
| CO5A1_HUMAN | 1792 | VDGCATKKGYQKT  | -1 | training |
| CO5A1_HUMAN | 1793 | DGCATKKGYQKTV  | -1 | training |
| CO5A1_HUMAN | 1797 | TKKGYQKTVLEID  | -1 | training |
| CO5A1_HUMAN | 1806 | LEIDTPKVEQVPI  | -1 | training |
| CO5A1_HUMAN | 1826 | FGEASQKFGFEVG  | -1 | training |
| CO7A1_HUMAN | 2625 | MGPRGLKGERGVK  | 1  | training |
| CO7A1_HUMAN | 2631 | KGERGVKGACGLD  | 1  | training |
| CO7A1_HUMAN | 113  | IRELSYKGGNTRT  | -1 | training |
| CO7A1_HUMAN | 142  | ARPGVPKVCILIT  | -1 | training |
| CO7A1_HUMAN | 151  | ILITDGKSQDLVD  | -1 | training |
| CO7A1_HUMAN | 164  | TAAQRLKGQGVKL  | -1 | training |
| CO7A1_HUMAN | 169  | LKGQGVKLFVAVGI | -1 | training |
| CO7A1_HUMAN | 176  | LFAVGIKNADPEE  | -1 | training |
| CO7A1_HUMAN | 184  | ADPEELKRVASQP  | -1 | training |
| CO7A1_HUMAN | 263  | GPVTGYKVVQYTPL | -1 | training |
| CO7A1_HUMAN | 459  | GLEPPQKVVLPSD  | -1 | training |
| CO7A1_HUMAN | 727  | SAHGPEKSQLVSG  | -1 | training |
| CO7A1_HUMAN | 1253 | CPVYCPKGQKGEP  | -1 | training |
| CO7A1_HUMAN | 1256 | YCPKGQKGEPGEM  | -1 | training |
| CO7A1_HUMAN | 1295 | PGSATAKGERGFP  | -1 | training |
| CO7A1_HUMAN | 1325 | PGAPGLKGSPGLP  | -1 | training |
| CO7A1_HUMAN | 1346 | RGPRGPKGEPGAP  | -1 | training |
| CO7A1_HUMAN | 1367 | PGLPGRKGDGPS   | -1 | training |
| CO7A1_HUMAN | 1399 | LPGTAMKGDKGDR  | -1 | training |
| CO7A1_HUMAN | 1402 | TAMKGDKGDRGER  | -1 | training |
| CO7A1_HUMAN | 1443 | PVGPPGKKGEKGD  | -1 | training |
| CO7A1_HUMAN | 1444 | VGPPGKKGEKGDS  | -1 | training |
| CO7A1_HUMAN | 1447 | PGKKGEKGDSEDG  | -1 | training |
| CO7A1_HUMAN | 1479 | PGAIGPKGDRGFP  | -1 | training |
| CO7A1_HUMAN | 1494 | LGEAGEKGERGPP  | -1 | training |
| CO7A1_HUMAN | 1518 | AGRPGAKGPEGPP  | -1 | training |
| CO7A1_HUMAN | 1533 | TGRQGEKGEPGRP  | -1 | training |
| CO7A1_HUMAN | 1553 | PAVAGPKGEKGDV  | -1 | training |
| CO7A1_HUMAN | 1556 | AGPKGEKGDVGPA  | -1 | training |
| CO7A1_HUMAN | 1588 | PGDPGPKGDGDR   | -1 | training |
| CO7A1_HUMAN | 1615 | SGPPGEKGDGDRP  | -1 | training |
| CO7A1_HUMAN | 1639 | DGEVGEKGDEGPP  | -1 | training |
| CO7A1_HUMAN | 1653 | DPGLPGKAGERGL  | -1 | training |
| CO7A1_HUMAN | 1672 | RGPVGEKGDQGDV  | -1 | training |
| CO7A1_HUMAN | 1693 | PGSSGPKGDRGEP  | -1 | training |
| CO7A1_HUMAN | 1718 | GPGAREKGEKGDV  | -1 | training |
| CO7A1_HUMAN | 1733 | EGPRGPKGDGDRP  | -1 | training |
| CO7A1_HUMAN | 1769 | RGPAGEKGDGDRP  | -1 | training |

|             |      |                 |    |          |
|-------------|------|-----------------|----|----------|
| CO7A1_HUMAN | 1786 | RSGLDGKPGAAGP   | -1 | training |
| CO7A1_HUMAN | 1801 | PNGAAGKAGDPGR   | -1 | training |
| CO7A1_HUMAN | 1831 | PPGLPGKPGEDGK   | -1 | training |
| CO7A1_HUMAN | 1837 | KPGEDGKPGLNGK   | -1 | training |
| CO7A1_HUMAN | 1843 | KPGLNGKNGEPGD   | -1 | training |
| CO7A1_HUMAN | 1856 | PGEDGRKGEKGDS   | -1 | training |
| CO7A1_HUMAN | 1859 | DGRKGEKGD SGAS  | -1 | training |
| CO7A1_HUMAN | 1874 | EGRDGPKGERGAP   | -1 | training |
| CO7A1_HUMAN | 1912 | PGGTGPKGDRGET   | -1 | training |
| CO7A1_HUMAN | 1921 | RGETGSKGEQGLP   | -1 | training |
| CO7A1_HUMAN | 1952 | LETAGIKASALRE   | -1 | training |
| CO7A1_HUMAN | 1981 | ERRRGPKGDSGEQ   | -1 | training |
| CO7A1_HUMAN | 1992 | EQPPGKEGPIGF    | -1 | training |
| CO7A1_HUMAN | 2005 | PGERGLKGDRGDP   | -1 | training |
| CO7A1_HUMAN | 2038 | LAGEPGKPGIPGL   | -1 | training |
| CO7A1_HUMAN | 2066 | RGERGEKGERGEQ   | -1 | training |
| CO7A1_HUMAN | 2093 | PGPPGPKVSVDEP   | -1 | training |
| CO7A1_HUMAN | 2113 | QGPPGLKGAKGEP   | -1 | training |
| CO7A1_HUMAN | 2116 | PGLKGAKGEPGSN   | -1 | training |
| CO7A1_HUMAN | 2128 | NGDQGPKGDRGVP   | -1 | training |
| CO7A1_HUMAN | 2137 | RGVPGIKGDRGEP   | -1 | training |
| CO7A1_HUMAN | 2166 | MAGPEGKPG LQGP  | -1 | training |
| CO7A1_HUMAN | 2206 | QGPSGLKGEPGET   | -1 | training |
| CO7A1_HUMAN | 2255 | QVGETGKPGAPGR   | -1 | training |
| CO7A1_HUMAN | 2267 | RDGASGKDGD RGS  | -1 | training |
| CO7A1_HUMAN | 2289 | PGPVGPKGEPGPT   | -1 | training |
| CO7A1_HUMAN | 2309 | VGLPGA KGEKGAP  | -1 | training |
| CO7A1_HUMAN | 2312 | PGA KGEKGAPGGL  | -1 | training |
| CO7A1_HUMAN | 2329 | VGEPGAKGDRGLP   | -1 | training |
| CO7A1_HUMAN | 2341 | PGPRGEKGEAGRA   | -1 | training |
| CO7A1_HUMAN | 2359 | PGEDGQKGAPGPK   | -1 | training |
| CO7A1_HUMAN | 2365 | KGAPGPKGFKGDP   | -1 | training |
| CO7A1_HUMAN | 2368 | PGPKGFKGD P VG  | -1 | training |
| CO7A1_HUMAN | 2388 | PGPPGVKGD LGLP  | -1 | training |
| CO7A1_HUMAN | 2457 | PGASGLKGDKGDP   | -1 | training |
| CO7A1_HUMAN | 2460 | SGLKGDKGD P VG  | -1 | training |
| CO7A1_HUMAN | 2507 | RGERGEKGD V GSA | -1 | training |
| CO7A1_HUMAN | 2516 | VGSAGLKGDKGDS   | -1 | training |
| CO7A1_HUMAN | 2519 | AGLKGDKGDS AVI  | -1 | training |
| CO7A1_HUMAN | 2535 | PGPRGAKGDMGER   | -1 | training |
| CO7A1_HUMAN | 2550 | RGLDGDKGPRGDN   | -1 | training |
| CO7A1_HUMAN | 2562 | NGDPGDKGSKGEP   | -1 | training |
| CO7A1_HUMAN | 2565 | PGDKGSKGEPGDK   | -1 | training |

|             |      |               |    |          |
|-------------|------|---------------|----|----------|
| CO7A1_HUMAN | 2571 | KGEPGDKGSAGLP | -1 | training |
| CO7A1_HUMAN | 2603 | DPGSPGKDGVPGI | -1 | training |
| CO7A1_HUMAN | 2613 | PGIRGEKGDVGF  | -1 | training |
| CO7A1_HUMAN | 2640 | CGLDGEKGDKGEA | -1 | training |
| CO7A1_HUMAN | 2643 | DGEKGDKGEAGPP | -1 | training |
| CO7A1_HUMAN | 2658 | PGLAGHKGEMGEP | -1 | training |
| CO7A1_HUMAN | 2675 | QSGAPGKEGLIGP | -1 | training |
| CO7A1_HUMAN | 2682 | EGLIGPKGDRGFD | -1 | training |
| CO7A1_HUMAN | 2694 | DGQPGPKGDQGEK | -1 | training |
| CO7A1_HUMAN | 2700 | KGDQGEKGERGTP | -1 | training |
| CO7A1_HUMAN | 2742 | EGLQGQKGERGPP | -1 | training |
| CO7A1_HUMAN | 2780 | AGPRGEKGEAALT | -1 | training |
| CO9A2_CHICK | 181  | NCPPGPKGPQGLQ | 1  | training |
| CO9A2_CHICK | 51   | DGIDGDKGSPGAP | -1 | training |
| CO9A2_CHICK | 63   | PGSPGAKGEPGAP | -1 | training |
| CO9A2_CHICK | 77   | PDGPPGKPLDGL  | -1 | training |
| CO9A2_CHICK | 87   | DGLTGAKGSRGPW | -1 | training |
| CO9A2_CHICK | 99   | WGGQGLKGQPGLP | -1 | training |
| CO9A2_CHICK | 137  | IGVPGPKGDPPD  | -1 | training |
| CO9A2_CHICK | 154  | PPGPPGKPGPPGH | -1 | training |
| CO9A2_CHICK | 190  | QGLQGLKGHRGRP | -1 | training |
| CO9A2_CHICK | 207  | EPGQQGKQGP    | -1 | training |
| CO9A2_CHICK | 211  | QGKQGP        | -1 | training |
| CO9A2_CHICK | 241  | PGMAGPKGETGPA | -1 | training |
| CO9A2_CHICK | 250  | TGPAGYKGMVGTI | -1 | training |
| CO9A2_CHICK | 268  | PGREGPKGPPGDP | -1 | training |
| CO9A2_CHICK | 277  | PGDPGEKGELGGR | -1 | training |
| CO9A2_CHICK | 295  | QGDIGPKGDMGLP | -1 | training |
| CO9A2_CHICK | 306  | LPGIDGKDGTPGI | -1 | training |
| CO9A2_CHICK | 316  | PGIPGVKGTAGQP | -1 | training |
| CO9A2_CHICK | 343  | PGQPGSKGGPGDK | -1 | training |
| CO9A2_CHICK | 349  | KGGPGDKGEVGAR | -1 | training |
| CO9A2_CHICK | 385  | AGVPGLKGDRGER | -1 | training |
| CO9A2_CHICK | 406  | AGQSGPKGEQPP  | -1 | training |
| CO9A2_CHICK | 424  | QGLPGVKGDKGSP | -1 | training |
| CO9A2_CHICK | 427  | PGVKGDKGSPGKT | -1 | training |
| CO9A2_CHICK | 432  | DKGSPGKTGPKGS | -1 | training |
| CO9A2_CHICK | 436  | PGKTGPKGSTGDP | -1 | training |
| CO9A2_CHICK | 451  | HGLAGVKGEKGES | -1 | training |
| CO9A2_CHICK | 454  | AGVKGEKGESGEP | -1 | training |
| CO9A2_CHICK | 463  | SGEPGPKGQQGIQ | -1 | training |
| CO9A2_CHICK | 529  | IIDVVLKMMQEQL | -1 | training |
| CO9A2_CHICK | 543  | EVAVSAKRAALGG | -1 | training |

|             |      |                |    |          |
|-------------|------|----------------|----|----------|
| CO9A2_CHICK | 595  | IGNIGPKGKRGEK  | -1 | training |
| CO9A2_CHICK | 597  | NIGPKGKRGEKGE  | -1 | training |
| CO9A2_CHICK | 601  | KGKRGEKGERGDT  | -1 | training |
| CO9A2_CHICK | 634  | GHALAGKDGERGP  | -1 | training |
| COEA1_HUMAN | 1476 | PGLRGPKGQQGEP  | 1  | training |
| COEA1_HUMAN | 1485 | QGEPGPKGPDGPR  | 1  | training |
| COEA1_HUMAN | 1523 | PGMPGEKGEKGDT  | 1  | training |
| COEA1_HUMAN | 1526 | PGEKGEKGDTGLP  | 1  | training |
| COEA1_HUMAN | 1601 | PGVPGAKGERGER  | 1  | training |
| COEA1_HUMAN | 1698 | RGLTGIKGEKGNP  | 1  | training |
| COEA1_HUMAN | 1701 | TGIKGEKGNPGVG  | 1  | training |
| COEA1_HUMAN | 2    | XXXXXMKIFQRKM  | -1 | training |
| COEA1_HUMAN | 7    | MKIFQRKMRYWLL  | -1 | training |
| COEA1_HUMAN | 51   | SIQISWKAPRGKF  | -1 | training |
| COEA1_HUMAN | 56   | WKAPRGKFGGYKL  | -1 | training |
| COEA1_HUMAN | 61   | GKFGGYKLLVTPT  | -1 | training |
| COEA1_HUMAN | 71   | TPTSGGKTNQLNL  | -1 | training |
| COEA1_HUMAN | 83   | LQNTATKAIQGL   | -1 | training |
| COEA1_HUMAN | 104  | QIIAYNKDKESKP  | -1 | training |
| COEA1_HUMAN | 106  | IAYNKDKESKPAQ  | -1 | training |
| COEA1_HUMAN | 109  | NKDKESKPAQGQF  | -1 | training |
| COEA1_HUMAN | 118  | QQQFRIKDLEKRK  | -1 | training |
| COEA1_HUMAN | 122  | RIKDLEKRKDPKP  | -1 | training |
| COEA1_HUMAN | 124  | KDLEKRKDPKPRV  | -1 | training |
| COEA1_HUMAN | 127  | EKRKDPKPRVKVV  | -1 | training |
| COEA1_HUMAN | 131  | DPKPRVKVVDRGN  | -1 | training |
| COEA1_HUMAN | 148  | SSPEEVKFVCQTP  | -1 | training |
| COEA1_HUMAN | 194  | FDVGSEKTRIGLA  | -1 | training |
| COEA1_HUMAN | 218  | LNAFSTKDEVIEA  | -1 | training |
| COEA1_HUMAN | 231  | VRNLPLYKGGNTLT | -1 | training |
| COEA1_HUMAN | 250  | IFENSKPEAGSR   | -1 | training |
| COEA1_HUMAN | 261  | SRTGVSKIGILIT  | -1 | training |
| COEA1_HUMAN | 270  | ILITDGKSQDDII  | -1 | training |
| COEA1_HUMAN | 295  | LFAIGVKNADVNE  | -1 | training |
| COEA1_HUMAN | 346  | EQDREIKASAHAI  | -1 | training |
| COEA1_HUMAN | 382  | APGNVEKYRVVYY  | -1 | training |
| COEA1_HUMAN | 394  | YPTRGGKPDEVVV  | -1 | training |
| COEA1_HUMAN | 410  | VSSTVLKNLMSLT  | -1 | training |
| COEA1_HUMAN | 462  | ENSMRVKWDVAVPG | -1 | training |
| COEA1_HUMAN | 488  | GLAGDEKEMKIGE  | -1 | training |
| COEA1_HUMAN | 491  | GDEKEMKIGETHT  | -1 | training |
| COEA1_HUMAN | 591  | ITTFPLKGLTPLT  | -1 | training |
| COEA1_HUMAN | 655  | ADEGLHKLMWIPV  | -1 | training |



|             |      |                |    |          |
|-------------|------|----------------|----|----------|
| COEA1_HUMAN | 665  | IPVYGGKTEEVVL  | -1 | training |
| COEA1_HUMAN | 672  | TEEVVLKEEQDSH  | -1 | training |
| COEA1_HUMAN | 754  | TSSLRVKWDISDS  | -1 | training |
| COEA1_HUMAN | 796  | QNNLLLKPLLPDT  | -1 | training |
| COEA1_HUMAN | 805  | LPDTEYKVTVTPI  | -1 | training |
| COEA1_HUMAN | 825  | SVSAPGKTLPSSG  | -1 | training |
| COEA1_HUMAN | 857  | PPSSPVKGYRIVY  | -1 | training |
| COEA1_HUMAN | 864  | GYRIVYKPVSVPG  | -1 | training |
| COEA1_HUMAN | 898  | GMDYNVKIFASQA  | -1 | training |
| COEA1_HUMAN | 916  | ALTGMVKTLFLGV  | -1 | training |
| COEA1_HUMAN | 928  | VTNLQAKHVEMTS  | -1 | training |
| COEA1_HUMAN | 960  | SLQDRQKQESTVG  | -1 | training |
| COEA1_HUMAN | 984  | QPDSEYKISVYTK  | -1 | training |
| COEA1_HUMAN | 990  | KISVYTKLQEIEG  | -1 | training |
| COEA1_HUMAN | 1004 | SVSIMEKTQSLPT  | -1 | training |
| COEA1_HUMAN | 1023 | PTIPPAKEVCKAA  | -1 | training |
| COEA1_HUMAN | 1027 | PAKEVCKAAKADL  | -1 | training |
| COEA1_HUMAN | 1030 | EVCKAAKADLVFM  | -1 | training |
| COEA1_HUMAN | 1050 | GDENFNKIISFLY  | -1 | training |
| COEA1_HUMAN | 1064 | TVGALNKIGTDGT  | -1 | training |
| COEA1_HUMAN | 1086 | DPRTEFKLNAYKT  | -1 | training |
| COEA1_HUMAN | 1091 | FKLNAYKTKETLL  | -1 | training |
| COEA1_HUMAN | 1093 | LNAYKTKETLLDA  | -1 | training |
| COEA1_HUMAN | 1101 | TLLDAIKHISYKG  | -1 | training |
| COEA1_HUMAN | 1106 | IKHISYKGGNTKT  | -1 | training |
| COEA1_HUMAN | 1111 | YKGGNTKTGKAIK  | -1 | training |
| COEA1_HUMAN | 1114 | GNTKTGKAIKYVR  | -1 | training |
| COEA1_HUMAN | 1117 | KTGKAIKYVRDTL  | -1 | training |
| COEA1_HUMAN | 1136 | TRRGIPKIVVIT   | -1 | training |
| COEA1_HUMAN | 1152 | SQDDVNKISREMQ  | -1 | training |
| COEA1_HUMAN | 1183 | LVSIGSKPSARHV  | -1 | training |
| COEA1_HUMAN | 1199 | DDFDAFKKIEDEL  | -1 | training |
| COEA1_HUMAN | 1200 | DFDAFKKIEDELI  | -1 | training |
| COEA1_HUMAN | 1222 | TCPVVHKDGDIDLA | -1 | training |
| COEA1_HUMAN | 1231 | IDLAGFKMMEMFG  | -1 | training |
| COEA1_HUMAN | 1241 | MFGLVEKDFSSVE  | -1 | training |
| COEA1_HUMAN | 1266 | PCYQLHKDALVSQ  | -1 | training |
| COEA1_HUMAN | 1311 | LWEILNKNSDPLV  | -1 | training |
| COEA1_HUMAN | 1326 | ILDNGGKTLTYFN  | -1 | training |
| COEA1_HUMAN | 1351 | EGPEIRKIFYGSF  | -1 | training |
| COEA1_HUMAN | 1359 | FYGSFHKLHIVVS  | -1 | training |
| COEA1_HUMAN | 1370 | VSETLVKVIDCK   | -1 | training |
| COEA1_HUMAN | 1376 | KVVIDCKQVGEKA  | -1 | training |

|             |      |               |    |          |
|-------------|------|---------------|----|----------|
| COEA1_HUMAN | 1381 | CKQVGEKAMNASA | -1 | training |
| COEA1_HUMAN | 1399 | GVEVLGKMVRSRG | -1 | training |
| COEA1_HUMAN | 1431 | SWANTDKCCELPG | -1 | training |
| COEA1_HUMAN | 1558 | QRGLPGKDGSSGP | -1 | training |
| CONG_BOVIN  | 63   | ECPHGEKGDPGSP | 1  | training |
| CONG_BOVIN  | 87   | VGPIGPKGDNGFV | 1  | training |
| CONG_BOVIN  | 99   | VGEPGPKGDTGPR | 1  | training |
| CONG_BOVIN  | 135  | PGTPGPKGETGPK | 1  | training |
| CONG_BOVIN  | 141  | KGETGPKGGVGAP | 1  | training |
| CONG_BOVIN  | 159  | PGPSGLKGEKGAP | 1  | training |
| CONG_BOVIN  | 162  | SGLKGEKGAPGET | 1  | training |
| CONG_BOVIN  | 198  | RGPPGLKGDRGDP | 1  | training |
| CONG_BOVIN  | 210  | PGETGAKGESGLA | 1  | training |
| CONG_BOVIN  | 29   | MTTFSQKILANAC | -1 | training |
| CONG_BOVIN  | 122  | REGPSGKQGSMGP | -1 | training |
| CONG_BOVIN  | 222  | AEVNALKQRVTIL | -1 | training |
| CONG_BOVIN  | 243  | NAFSQYKKAVLFP | -1 | training |
| CONG_BOVIN  | 244  | AFSQYKKAVLFPD | -1 | training |
| CONG_BOVIN  | 257  | GQAVGEKIFKTAG | -1 | training |
| CONG_BOVIN  | 260  | VGEKIFKTAGAVK | -1 | training |
| CONG_BOVIN  | 266  | KTAGAVKSYSDAE | -1 | training |
| CONG_BOVIN  | 279  | QLCREAKGQLASP | -1 | training |
| CONG_BOVIN  | 303  | MVRAQEKNAYLSM | -1 | training |
| CONG_BOVIN  | 355  | EIFPDGKWNDVPC | -1 | training |
| CONG_BOVIN  | 363  | NDVPCSKQLLVIC | -1 | training |
| LC7L2_HUMAN | 266  | RSRSHSKNPKRSR | 1  | training |
| LC7L2_HUMAN | 269  | SHSKNPKRSRSRE | 1  | training |
| LC7L2_HUMAN | 29   | TTRQRIKFSDDRV | -1 | training |
| LC7L2_HUMAN | 37   | SDDRVCKSHLLNC | -1 | training |
| LC7L2_HUMAN | 61   | DLGECLKVHDLAL | -1 | training |
| LC7L2_HUMAN | 76   | DYEIASKEQDFFF | -1 | training |
| LC7L2_HUMAN | 105  | RRTEVAKKRLAET | -1 | training |
| LC7L2_HUMAN | 106  | RTEVAKKRLAETQ | -1 | training |
| LC7L2_HUMAN | 122  | SAEVAKAERVHE  | -1 | training |
| LC7L2_HUMAN | 135  | LNEEIGKLLAKVE | -1 | training |
| LC7L2_HUMAN | 139  | IGKLLAKVEQLGA | -1 | training |
| LC7L2_HUMAN | 154  | NVEESQKVMDEVE | -1 | training |
| LC7L2_HUMAN | 161  | VMDEVEKARAKKR | -1 | training |
| LC7L2_HUMAN | 165  | VEKARAKKREAEV | -1 | training |
| LC7L2_HUMAN | 166  | EKARAKKREAEV  | -1 | training |
| LC7L2_HUMAN | 186  | SSFQQKLRVCEV  | -1 | training |
| LC7L2_HUMAN | 213  | ADHFGGKHLHGFV | -1 | training |
| LC7L2_HUMAN | 224  | FIEIREKLEELKR | -1 | training |

|             |     |                 |    |          |
|-------------|-----|-----------------|----|----------|
| LC7L2_HUMAN | 229 | EKLEELKRVVAEK   | -1 | training |
| LC7L2_HUMAN | 235 | KRVVAEKQEKRNQ   | -1 | training |
| LC7L2_HUMAN | 238 | VAEKQEKRNQERL   | -1 | training |
| LC7L2_HUMAN | 245 | RNQERLKRREERE   | -1 | training |
| LC7L2_HUMAN | 257 | EREEREKLRRSRS   | -1 | training |
| LC7L2_HUMAN | 289 | SMSRERKRRTRSK   | -1 | training |
| LC7L2_HUMAN | 295 | KRRTRSKSREKRH   | -1 | training |
| LC7L2_HUMAN | 299 | RSKSREKRHRHRS   | -1 | training |
| LC7L2_HUMAN | 332 | RSRERSKRRSSKE   | -1 | training |
| LC7L2_HUMAN | 337 | SKRRSSKERFRDQ   | -1 | training |
| LC7L2_HUMAN | 365 | PRDRDRKDKKRSY   | -1 | training |
| LC7L2_HUMAN | 367 | DRDRKDKKRSYES   | -1 | training |
| LC7L2_HUMAN | 368 | RDRKDKKRSYESA   | -1 | training |
| MBL1_RAT    | 44  | DGRDGPKEGEGEP   | 1  | training |
| MBL1_RAT    | 47  | DGPKGEGEGEPGQG  | 1  | training |
| MBL1_RAT    | 28  | TCEETLKTCSVIA   | -1 | training |
| MBL1_RAT    | 63  | LQPPGKLGPPGS    | -1 | training |
| MBL1_RAT    | 94  | SRAIEVLANMEA    | -1 | training |
| MBL1_RAT    | 106 | AEINTLKSLELT    | -1 | training |
| MBL1_RAT    | 108 | INTLKSLELTNK    | -1 | training |
| MBL1_RAT    | 114 | KLELTNKLHAFSM   | -1 | training |
| MBL1_RAT    | 122 | HAFSMGKKS GKKF  | -1 | training |
| MBL1_RAT    | 123 | AFSMGKKS GKKFF  | -1 | training |
| MBL1_RAT    | 126 | MGKKS GKKFFVTN  | -1 | training |
| MBL1_RAT    | 127 | GKKS GKKFFVTNH  | -1 | training |
| MBL1_RAT    | 140 | ERMPFSKVKALCS   | -1 | training |
| MBL1_RAT    | 142 | MPFSKVKALCSEL   | -1 | training |
| MBL1_RAT    | 162 | RNAEENKAIQEVA   | -1 | training |
| MBL1_RAT    | 169 | AIQEVAKTSAFLG   | -1 | training |
| MBL1_RAT    | 199 | LTYSNWKKDEPND   | -1 | training |
| MBL1_RAT    | 200 | TYSNWKKDEPNDH   | -1 | training |
| PHE2_RHDS2  | 41  | VNMAMDKSAKAPV   | 1  | training |
| PHE2_RHDS2  | 4   | XXXMSAKIIAFSA   | -1 | training |
| PHE2_RHDS2  | 44  | AMDKSAKAPVITI   | -1 | training |
| PHE2_RHDS2  | 61  | GCSRAPKEYTGAK   | -1 | training |
| PHE2_RHDS2  | 67  | KEYTGAKAGGKDD   | -1 | training |
| PHE2_RHDS2  | 71  | GAKAGGKDDEMMV   | -1 | training |
| PHE2_RHDS2  | 78  | DDEMMVKAQSVKI   | -1 | training |
| PHE2_RHDS2  | 83  | VKAQSVKIEVSTG   | -1 | training |
| PHE2_RHDS2  | 101 | LATSLAKMTKXXX   | -1 | training |
| PHE2_RHDS2  | 104 | SLAKMTKXXXXXXXX | -1 | training |
| PHE3_RHDS2  | 56  | AGAAMDKSAKAPQ   | 1  | training |
| PHE3_RHDS2  | 4   | XXXMFAKTLASLA   | -1 | training |

|             |     |                |    |          |
|-------------|-----|----------------|----|----------|
| PHE3_RHDS2  | 59  | AMDKSAKAPQITI  | -1 | training |
| PHE3_RHDS2  | 76  | GCSRAPKESTGGK  | -1 | training |
| PHE3_RHDS2  | 82  | KESTGGKAGGQDD  | -1 | training |
| PHE3_RHDS2  | 93  | DDEMMVKVASTKV  | -1 | training |
| PHE3_RHDS2  | 98  | VKVASTKVTVSES  | -1 | training |
| PHE3_RHDS2  | 108 | SESDAAKKLQEFI  | -1 | training |
| PHE3_RHDS2  | 109 | ESDAAKKLQEFIT  | -1 | training |
| PHE3_RHDS2  | 118 | EFITFEKGIDGPF  | -1 | training |
| PHE3_RHDS2  | 127 | DGPFTSKNXXXXXX | -1 | training |
| SFTPD_RAT   | 86  | RGPVGPKGENGSA  | 1  | training |
| SFTPD_RAT   | 98  | AGEPGPKGERGLV  | 1  | training |
| SFTPD_RAT   | 23  | DLGAEMKTLSQRS  | -1 | training |
| SFTPD_RAT   | 62  | EGPRGEKGDGPLP  | -1 | training |
| SFTPD_RAT   | 118 | ISGPAGKEGPSGK  | -1 | training |
| SFTPD_RAT   | 124 | KEGPSGKQGNIGP  | -1 | training |
| SFTPD_RAT   | 133 | NIGPQGKPGPKGE  | -1 | training |
| SFTPD_RAT   | 137 | QGKPGPKGEAGPK  | -1 | training |
| SFTPD_RAT   | 143 | KGEAGPKGEVGAP  | -1 | training |
| SFTPD_RAT   | 158 | QGSAGAKGPAGPK  | -1 | training |
| SFTPD_RAT   | 164 | KGPAGPKGERGAP  | -1 | training |
| SFTPD_RAT   | 203 | RGPPGLKGDRGAP  | -1 | training |
| SFTPD_RAT   | 215 | PGDRGIKGESGLP  | -1 | training |
| SFTPD_RAT   | 236 | MEALNGKLQRLEA  | -1 | training |
| SFTPD_RAT   | 248 | AAFSRYKKAALFP  | -1 | training |
| SFTPD_RAT   | 249 | AFSRYKKAALFPD  | -1 | training |
| SFTPD_RAT   | 262 | GQSVGDKIFRAAN  | -1 | training |
| SFTPD_RAT   | 277 | EPFEDAKEMCRQA  | -1 | training |
| SFTPD_RAT   | 308 | LVTAHSKAAFLSM  | -1 | training |
| SFTPD_RAT   | 322 | DVGTEGKFTYPTG  | -1 | training |
| SFTPD_RAT   | 362 | NGQWNDKACGEQR  | -1 | training |
| STYD_STYCL  | 27  | EAGWLRKAAKSVG  | 1  | training |
| STYD_STYCL  | 30  | WLRKAAKSVGKIFY | 1  | training |
| STYD_STYCL  | 34  | AAKSVGKFYYKHK  | 1  | training |
| STYD_STYCL  | 38  | VGKFYYKHKYYIK  | 1  | training |
| STYD_STYCL  | 40  | KFYYKHKYYIKAA  | 1  | training |
| STYD_STYCL  | 44  | KHKYYIKAAWQIG  | 1  | training |
| STYD_STYCL  | 4   | XXXMQMKATILIV  | -1 | training |
| STYD_STYCL  | 51  | AAWQIGKHALGDM  | -1 | training |
| STYD_STYCL  | 67  | EFQDFMKEVEQAR  | -1 | training |
| U2AF2_HUMAN | 15  | RQLNENKQERDKE  | 1  | training |
| U2AF2_HUMAN | 276 | LNDDQVKELLTSF  | 1  | training |
| U2AF2_HUMAN | 20  | NKQERDKENRHRK  | -1 | training |
| U2AF2_HUMAN | 26  | KENRHRKRSHSRS  | -1 | training |

|             |     |                           |    |                     |
|-------------|-----|---------------------------|----|---------------------|
| U2AF2_HUMAN | 38  | SRSRDRKRRSRSR             | -1 | training            |
| U2AF2_HUMAN | 63  | DRRRRSKPLTRGA             | -1 | training            |
| U2AF2_HUMAN | 70  | PLTRGAKEEHGGL             | -1 | training            |
| U2AF2_HUMAN | 84  | RSPRHEK K K K V R K       | -1 | training            |
| U2AF2_HUMAN | 85  | SPRHEK K K K V R K Y      | -1 | training            |
| U2AF2_HUMAN | 86  | PRHEK K K K V R K Y W     | -1 | training            |
| U2AF2_HUMAN | 87  | RHEK K K K V R K Y W D    | -1 | training            |
| U2AF2_HUMAN | 90  | K K K K V R K Y W D V P P | -1 | training            |
| U2AF2_HUMAN | 108 | ITPMQYKAMQAAG             | -1 | training            |
| U2AF2_HUMAN | 195 | VQINQDKNF AFLE            | -1 | training            |
| U2AF2_HUMAN | 225 | FQGQSLKIRRP HD            | -1 | training            |
| U2AF2_HUMAN | 260 | VPDSA HKL F I G G L       | -1 | training            |
| U2AF2_HUMAN | 286 | TSFGPLKAFNLVK             | -1 | training            |
| U2AF2_HUMAN | 292 | KAFNLVKDSATGL             | -1 | training            |
| U2AF2_HUMAN | 300 | SATGLSKGYAFCE             | -1 | training            |
| U2AF2_HUMAN | 328 | GMQLGDKKLLVQR             | -1 | training            |
| U2AF2_HUMAN | 329 | MQLGDKKLLVQRA             | -1 | training            |
| U2AF2_HUMAN | 340 | RASVGAKNATLVS             | -1 | training            |
| U2AF2_HUMAN | 408 | VRDECSKYGLVKS             | -1 | training            |
| U2AF2_HUMAN | 413 | SKYGLVKSIEIPR             | -1 | training            |
| U2AF2_HUMAN | 431 | EVPGCGKIFVEFT             | -1 | training            |
| U2AF2_HUMAN | 444 | SVFDCQKAMQGLT             | -1 | training            |
| U2AF2_HUMAN | 453 | QGLTGRKFANRVV             | -1 | training            |
| U2AF2_HUMAN | 462 | NRVVVTKYCDPDS             | -1 | training            |
| ADIPO_BOVIN | 28  | EDPPLPKGACAGW             | 1  | external validation |
| ADIPO_BOVIN | 60  | DGTPGEKGEKGDP             | 1  | external validation |
| ADIPO_BOVIN | 63  | PGEKGEKGD PGLV            | 1  | external validation |
| ADIPO_BOVIN | 72  | PGLVGPKGDTGET             | 1  | external validation |
| ADIPO_BOVIN | 96  | PGTPGRKGEPGES             | 1  | external validation |
| ADIPO_BOVIN | 129 | VPIRFTKIFYNQQ             | -1 | external validation |
| ADIPO_BOVIN | 144 | YDGTGKFLCNIP              | -1 | external validation |
| ADIPO_BOVIN | 164 | HITVYLKDVKVSL             | -1 | external validation |
| ADIPO_BOVIN | 167 | VYLKDVKVSLYKN             | -1 | external validation |
| ADIPO_BOVIN | 172 | VKVS LYKNDKALL            | -1 | external validation |
| ADIPO_BOVIN | 175 | SLYKNDKALLFTH             | -1 | external validation |
| ADIPO_BOVIN | 187 | HDQFQDKNVDQAS             | -1 | external validation |
| ADIPO_BOVIN | 202 | VLLYLEKGDQVWL             | -1 | external validation |
| CECB_HELVI  | 21  | IRDGIVKAGPAIA             | 1  | external validation |
| CECB_HELVI  | 1   | XXXXXXXXKWKVFKK           | -1 | external validation |
| CECB_HELVI  | 3   | XXXXKWKVFKKIE             | -1 | external validation |
| CECB_HELVI  | 6   | XKWKVFKKIEKVG             | -1 | external validation |
| CECB_HELVI  | 7   | KWKVFKKIEKVGR             | -1 | external validation |
| CECB_HELVI  | 10  | VFKKIEKVGRNIR             | -1 | external validation |

|             |      |               |    |                     |
|-------------|------|---------------|----|---------------------|
| CO6A3_HUMAN | 2103 | RGFPGEKGEVGEI | 1  | external validation |
| CO6A3_HUMAN | 2209 | RGPPGAKGNKGGP | 1  | external validation |
| CO6A3_HUMAN | 2212 | PGAAGNKGKGGPQ | 1  | external validation |
| CO6A3_HUMAN | 2322 | PGYPGPKGNPGE  | 1  | external validation |
| CO6A3_HUMAN | 2337 | NGTTGPKGIRGRR | 1  | external validation |
| CO6A3_HUMAN | 3    | XXXXMRKHRHLPL | -1 | external validation |
| CO6A3_HUMAN | 33   | QQQADVKNAAAD  | -1 | external validation |
| CO6A3_HUMAN | 67   | FLYDVVKSLAVGE | -1 | external validation |
| CO6A3_HUMAN | 99   | LNTYRTKQEVLSH | -1 | external validation |
| CO6A3_HUMAN | 120  | GTNQTGKLEYIM  | -1 | external validation |
| CO6A3_HUMAN | 132  | MQSHLTKAAGSRA | -1 | external validation |
| CO6A3_HUMAN | 155  | LTDGHSKDGLALP | -1 | external validation |
| CO6A3_HUMAN | 166  | LPSAELKSADVNV | -1 | external validation |
| CO6A3_HUMAN | 186  | ADEGALKEIASEP | -1 | external validation |
| CO6A3_HUMAN | 233  | GDTETLKDITAQD | -1 | external validation |
| CO6A3_HUMAN | 271  | LVNLEKLPITQ   | -1 | external validation |
| CO6A3_HUMAN | 302  | LDTYSTKAQVLGA | -1 | external validation |
| CO6A3_HUMAN | 310  | QVLGAVKALGFAG | -1 | external validation |
| CO6A3_HUMAN | 370  | YGVVALKQASVFS | -1 | external validation |
| CO6A3_HUMAN | 414  | FGDLQEKLLPYIV | -1 | external validation |
| CO6A3_HUMAN | 430  | QRHIVLKPPTIVT | -1 | external validation |
| CO6A3_HUMAN | 443  | QVIEVNKRDIVFL | -1 | external validation |
| CO6A3_HUMAN | 470  | IRDFIAKVIQRLE | -1 | external validation |
| CO6A3_HUMAN | 505  | FNTHPTKREVITA | -1 | external validation |
| CO6A3_HUMAN | 514  | VITAVRKMKPLDG | -1 | external validation |
| CO6A3_HUMAN | 516  | TAVRKMKPLDGSA | -1 | external validation |
| CO6A3_HUMAN | 551  | AAEGIPKLLVLIT | -1 | external validation |
| CO6A3_HUMAN | 560  | VLITGGKSLDEIS | -1 | external validation |
| CO6A3_HUMAN | 573  | QPAQELKRSSIMA | -1 | external validation |
| CO6A3_HUMAN | 585  | AFAIGNKGADQAE | -1 | external validation |
| CO6A3_HUMAN | 637  | PEVHSNKRDIIFL | -1 | external validation |
| CO6A3_HUMAN | 652  | GSANVGKTNFPYV | -1 | external validation |
| CO6A3_HUMAN | 699  | LNTYQTKSDILGH | -1 | external validation |
| CO6A3_HUMAN | 783  | GASQANKAELEQI | -1 | external validation |
| CO6A3_HUMAN | 835  | LAQPESKRDILFL | -1 | external validation |
| CO6A3_HUMAN | 861  | VRDFLYKIIDELN | -1 | external validation |
| CO6A3_HUMAN | 869  | IDELNVKPEGTRI | -1 | external validation |
| CO6A3_HUMAN | 885  | QYSDDVKVESRFD | -1 | external validation |
| CO6A3_HUMAN | 896  | FDEHQSKPEILNL | -1 | external validation |
| CO6A3_HUMAN | 904  | EILNLVKRMKIKT | -1 | external validation |
| CO6A3_HUMAN | 907  | NLVKRMKIKTGKA | -1 | external validation |
| CO6A3_HUMAN | 909  | VKRMKIKTGKALN | -1 | external validation |
| CO6A3_HUMAN | 912  | MKIKTGKALNLGY | -1 | external validation |

|             |      |                |    |                     |
|-------------|------|----------------|----|---------------------|
| CO6A3_HUMAN | 930  | QRYIFVKSAGSRI  | -1 | external validation |
| CO6A3_HUMAN | 964  | GPASNLKQSGVVP  | -1 | external validation |
| CO6A3_HUMAN | 976  | PFIFQAKNADPAE  | -1 | external validation |
| CO6A3_HUMAN | 1001 | AAESLPKIGDLHP  | -1 | external validation |
| CO6A3_HUMAN | 1014 | QIVNLLKSVHNGA  | -1 | external validation |
| CO6A3_HUMAN | 1028 | APVSGEKDVFVFL  | -1 | external validation |
| CO6A3_HUMAN | 1048 | SGFPLLKEFVQRV  | -1 | external validation |
| CO6A3_HUMAN | 1088 | LNSYMNKQDVVNA  | -1 | external validation |
| CO6A3_HUMAN | 1156 | NPSVVVKRGGAVP  | -1 | external validation |
| CO6A3_HUMAN | 1231 | SPGVGGKRDVVFL  | -1 | external validation |
| CO6A3_HUMAN | 1281 | QFSDDPKVEFLN   | -1 | external validation |
| CO6A3_HUMAN | 1292 | LNAHSSKDEVQNA  | -1 | external validation |
| CO6A3_HUMAN | 1305 | VQRLRPKGGRQIN  | -1 | external validation |
| CO6A3_HUMAN | 1325 | VSRNIFKRPLGSR  | -1 | external validation |
| CO6A3_HUMAN | 1347 | VLISSGKSDDEV   | -1 | external validation |
| CO6A3_HUMAN | 1360 | DPAVELKQFGVAP  | -1 | external validation |
| CO6A3_HUMAN | 1380 | DQEELVKISLSPE  | -1 | external validation |
| CO6A3_HUMAN | 1403 | LPSLEQKLLTPIT  | -1 | external validation |
| CO6A3_HUMAN | 1418 | TSEIQKLLASTR   | -1 | external validation |
| CO6A3_HUMAN | 1472 | LNIGPSKVRVGVV  | -1 | external validation |
| CO6A3_HUMAN | 1491 | FPEFYLKTYRSQA  | -1 | external validation |
| CO6A3_HUMAN | 1518 | SPLNTGKALEFVA  | -1 | external validation |
| CO6A3_HUMAN | 1530 | ARNLFVKSAGSRI  | -1 | external validation |
| CO6A3_HUMAN | 1551 | VLVLGGKSQDDVS  | -1 | external validation |
| CO6A3_HUMAN | 1635 | PPSRPEKKKADIV  | -1 | external validation |
| CO6A3_HUMAN | 1636 | PSRPEKKKADIVF  | -1 | external validation |
| CO6A3_HUMAN | 1637 | SRPEKKKADIVFL  | -1 | external validation |
| CO6A3_HUMAN | 1694 | TDEFFLKDFSTKR  | -1 | external validation |
| CO6A3_HUMAN | 1699 | LKDFSTKRQIIDA  | -1 | external validation |
| CO6A3_HUMAN | 1708 | IIDAINKVVYKGG  | -1 | external validation |
| CO6A3_HUMAN | 1712 | INKVVYKGGRRHAN | -1 | external validation |
| CO6A3_HUMAN | 1720 | GRHANTKVGLEHL  | -1 | external validation |
| CO6A3_HUMAN | 1754 | FVITGGKSVEDAQ  | -1 | external validation |
| CO6A3_HUMAN | 1772 | LTQRGVKVFAVGV  | -1 | external validation |
| CO6A3_HUMAN | 1788 | DSEEVGKIASNSA  | -1 | external validation |
| CO6A3_HUMAN | 1833 | GVTDAAKACNLDV  | -1 | external validation |
| CO6A3_HUMAN | 1856 | NVFVAQKGFESKV  | -1 | external validation |
| CO6A3_HUMAN | 1861 | QKGFESKVDAILN  | -1 | external validation |
| CO6A3_HUMAN | 1913 | QPEMLEKFRNMRS  | -1 | external validation |
| CO6A3_HUMAN | 1931 | LTEDTLKVYLNKF  | -1 | external validation |
| CO6A3_HUMAN | 1936 | LKVYLNKFRQSSP  | -1 | external validation |
| CO6A3_HUMAN | 1946 | SSPDSVKVVIHFT  | -1 | external validation |
| CO6A3_HUMAN | 2027 | LDNIAEKACCGVP  | -1 | external validation |

|             |      |                |    |                     |
|-------------|------|----------------|----|---------------------|
| CO6A3_HUMAN | 2035 | CCGVPCCKCSGQRG | -1 | external validation |
| CO6A3_HUMAN | 2052 | IGSIGPKGIPGED  | -1 | external validation |
| CO6A3_HUMAN | 2094 | PGQRGVKGSRGFP  | -1 | external validation |
| CO6A3_HUMAN | 2121 | DGEDGDKGLPGSS  | -1 | external validation |
| CO6A3_HUMAN | 2130 | PGSSGEKGNPGRR  | -1 | external validation |
| CO6A3_HUMAN | 2139 | PGRRGDKGPRGEK  | -1 | external validation |
| CO6A3_HUMAN | 2145 | KGPRGEKGERGDV  | -1 | external validation |
| CO6A3_HUMAN | 2170 | SQERGPKGETGDL  | -1 | external validation |
| CO6A3_HUMAN | 2196 | GPGETGKNGGFGR  | -1 | external validation |
| CO6A3_HUMAN | 2272 | TGPLGRKGEPGEP  | -1 | external validation |
| CO6A3_HUMAN | 2281 | PGEPGPKGGIGNR  | -1 | external validation |
| CO6A3_HUMAN | 2309 | SEGRRGKKGERGF  | -1 | external validation |
| CO6A3_HUMAN | 2310 | EGRRGKKGERGFP  | -1 | external validation |
| CO6A3_HUMAN | 2355 | PGIVGQKGDPGYP  | -1 | external validation |
| CO6A3_HUMAN | 2367 | PGPAGPKGNRGDS  | -1 | external validation |
| CO6A3_HUMAN | 2384 | ALIQSIKDKCPC   | -1 | external validation |
| CO6A3_HUMAN | 2386 | IQSIKDKCPCCYG  | -1 | external validation |
| CO6A3_HUMAN | 2464 | IRFADSKRKS     | -1 | external validation |
| CO6A3_HUMAN | 2466 | FADSKRKS       | -1 | external validation |
| CO6A3_HUMAN | 2472 | KSVLLDKIKNLQV  | -1 | external validation |
| CO6A3_HUMAN | 2474 | VLLDKIKNLQVAL  | -1 | external validation |
| CO6A3_HUMAN | 2483 | QVALTSKQQSLET  | -1 | external validation |
| CO6A3_HUMAN | 2500 | VARNTFKRVRNGF  | -1 | external validation |
| CO6A3_HUMAN | 2510 | NGFLMRKVAVFFS  | -1 | external validation |
| CO6A3_HUMAN | 2532 | LREAVLKLSDAGI  | -1 | external validation |
| CO6A3_HUMAN | 2639 | FQFNEMKKYIAYL  | -1 | external validation |
| CO6A3_HUMAN | 2640 | QFNEMKKYIAYLV  | -1 | external validation |
| CO6A3_HUMAN | 2656 | DMSPDPKASQHFA  | -1 | external validation |
| CO6A3_HUMAN | 2684 | ASMPVVKVEFSLT  | -1 | external validation |
| CO6A3_HUMAN | 2695 | LTDYGSKEKLVDF  | -1 | external validation |
| CO6A3_HUMAN | 2697 | DYGSKEKLVDFLS  | -1 | external validation |
| CO6A3_HUMAN | 2737 | PNPRDLKIVVLM   | -1 | external validation |
| CO6A3_HUMAN | 2763 | RVILQAKCKGYFF  | -1 | external validation |
| CO6A3_HUMAN | 2765 | ILQAKCKGYFFVV  | -1 | external validation |
| CO6A3_HUMAN | 2777 | VLGIGRKNVNIKEV | -1 | external validation |
| CO6A3_HUMAN | 2781 | GRKVNIVEVYTF   | -1 | external validation |
| CO6A3_HUMAN | 2796 | PNDVFFKLVDKST  | -1 | external validation |
| CO6A3_HUMAN | 2800 | FFKLVDKSTELNE  | -1 | external validation |
| CO6A3_HUMAN | 2834 | LSPDIRKQCDWFQ  | -1 | external validation |
| CO6A3_HUMAN | 2846 | QGDQPTKNLVKFG  | -1 | external validation |
| CO6A3_HUMAN | 2850 | PTKNLVKFGHKQV  | -1 | external validation |
| CO6A3_HUMAN | 2854 | LVKFGHKQVNVN   | -1 | external validation |
| CO6A3_HUMAN | 2875 | NPVTTTKPVTTTK  | -1 | external validation |



|             |      |                |    |                     |
|-------------|------|----------------|----|---------------------|
| CO6A3_HUMAN | 2881 | KPVTTTTKPVTTTT | -1 | external validation |
| CO6A3_HUMAN | 2888 | PVTTTTTKPVTTTT | -1 | external validation |
| CO6A3_HUMAN | 2895 | PVTTTTTKPVTIIN | -1 | external validation |
| CO6A3_HUMAN | 2906 | INQPSVKPAAAKP  | -1 | external validation |
| CO6A3_HUMAN | 2911 | VKPAAAKPAPAKP  | -1 | external validation |
| CO6A3_HUMAN | 2916 | AKPAPAKPVAAKP  | -1 | external validation |
| CO6A3_HUMAN | 2921 | AKPVAAKPVATKM  | -1 | external validation |
| CO6A3_HUMAN | 2926 | AKPVATKMATVRP  | -1 | external validation |
| CO6A3_HUMAN | 2937 | RPPVAVKPATAAK  | -1 | external validation |
| CO6A3_HUMAN | 2943 | KPATAAKPVAAKP  | -1 | external validation |
| CO6A3_HUMAN | 2948 | AKPVAAKPAAVRP  | -1 | external validation |
| CO6A3_HUMAN | 2961 | PAAAAAKPVATKP  | -1 | external validation |
| CO6A3_HUMAN | 2966 | AKPVATKPEVPRP  | -1 | external validation |
| CO6A3_HUMAN | 2976 | PRPQAAKPAATKP  | -1 | external validation |
| CO6A3_HUMAN | 2981 | AKPAATKPATTKP  | -1 | external validation |
| CO6A3_HUMAN | 2986 | TKPATTKPMVKMS  | -1 | external validation |
| CO6A3_HUMAN | 2990 | TTKPMVKMSREVQ  | -1 | external validation |
| CO6A3_HUMAN | 3006 | ITENSAKLHWERA  | -1 | external validation |
| CO6A3_HUMAN | 3035 | DQSLVLKQNLTVT  | -1 | external validation |
| CO6A3_HUMAN | 3077 | HGSFSTKKSQPPP  | -1 | external validation |
| CO6A3_HUMAN | 3078 | GSFSTKKSQPPPP  | -1 | external validation |
| CO6A3_HUMAN | 3113 | TETDICKLPKDEG  | -1 | external validation |
| CO6A3_HUMAN | 3116 | DICKLPKDEGTCR  | -1 | external validation |
| CO6A3_HUMAN | 3127 | CRDFILKWYYDPN  | -1 | external validation |
| CO6A3_HUMAN | 3135 | YYDPNTKSCARFW  | -1 | external validation |
| CO6A3_HUMAN | 3151 | CGGNENKFGSQKE  | -1 | external validation |
| CO6A3_HUMAN | 3156 | NKFGSQKECEKVC  | -1 | external validation |
| CO6A3_HUMAN | 3160 | SQKECEKVCAPVL  | -1 | external validation |
| CO6A3_HUMAN | 3168 | CAPVLAKPGVISV  | -1 | external validation |
| SMS2_LOPAM  | 120  | CKNFYWKGFTSCX  | 1  | external validation |
| SMS2_LOPAM  | 61   | LSQEWSKRAVEEL  | -1 | external validation |
| SMS2_LOPAM  | 111  | LPPRERKAGCKNF  | -1 | external validation |
| SMS2_LOPAM  | 115  | ERKAGCKNFYWKG  | -1 | external validation |

---
