# Supplementary material for: HydPred: a novel method for the identification of protein hydroxylation sites that reveals new insights into human inherited disease
Source: Royal Society of Chemistry journal article supplement (doi:10.1039/c5mb00681c), 2015-11-26
Supplement: c5mb00681c2.pdf [file c5mb00681c2.pdf]

Table S2. Key features that selected for HydPred

| Hydroxyproline |            |          |                                                                           |
|----------------|------------|----------|---------------------------------------------------------------------------|
| Rank           | Feature    | Category | Note                                                                      |
| 1              | G0T        | I        | Residue pair composition of G and T pair that are being together          |
| 2              | G3T        | I        | Residue pair composition of G and T pair that are separated by 3 residues |
| 3              | posPWM.8   | III      | Positive position weighted matrices value at position 8                   |
| 4              | H1G        | I        | Residue pair composition of H and G pair that are separated by 1 residue  |
| 5              | H6D        | I        | Residue pair composition of H and D pair that are separated by 6 residues |
| 6              | H2T        | I        | Residue pair composition of H and T pair that are separated by 2 residues |
| 7              | locAA_8_G  | IV       | Amino acid binary localization encoding for G at position 8               |
| 8              | G0H        | I        | Residue pair composition of G and H pair that are attached each other     |
| 9              | posPWM.11  | III      | Positive position weighted matrices value at position 11                  |
| 10             | negPWM.9   | III      | Negative position weighted matrices value at position 9                   |
| 11             | locAA_2_G  | IV       | Amino acid binary localization encoding for G at position 2               |
| 12             | locAA_5_G  | IV       | Amino acid binary localization encoding for G at position 5               |
| 13             | posPWM.5   | III      | Positive position weighted matrices value at position 5                   |
| 14             | locAA_3_G  | IV       | Amino acid binary localization encoding for G at position 3               |
| 15             | locAA_9_G  | IV       | Amino acid binary localization encoding for G at position 9               |
| 16             | H3P        | I        | Residue pair composition of H and P pair that are separated by 3 residues |
| 17             | locAA_11_G | IV       | Amino acid binary localization encoding for G at position 11              |
| 18             | negPWM.6   | III      | Negative position weighted matrices value at position 6                   |
| 19             | I9P        | I        | Residue pair composition of I and P pair that are separated by 9 residues |
| 20             | negPWM.3   | III      | Negative position weighted matrices value at position 3                   |
| 21             | negPWM.8   | III      | Negative position weighted matrices value at position 8                   |
| 22             | H4G        | I        | Residue pair composition of H and G pair that are separated by 4 residues |
| 23             | T          | I        | Single amino acid composition of T                                        |
| 24             | locAA_6_G  | IV       | Amino acid binary localization encoding for G at position 6               |
| 25             | I8T        | I        | Residue pair composition of I and T pair that are separated by 8 residues |
| 26             | G3F        | I        | Residue pair composition of G and F pair that are separated by 3 residues |
| 27             | G1E        | I        | Residue pair composition of G and E pair that are separated by 1 residue  |
| 28             | I7G        | I        | Residue pair composition of I and G pair that are separated by 7 residues |
| 29             | T5R        | I        | Residue pair composition of T and R pair that are separated by 5 residues |
| 30             | posPWM.2   | III      | Positive position weighted matrices value at position 2                   |
| 31             | E3G        | I        | Residue pair composition of E and G pair that are separated by 3 residues |
| 32             | G7D        | I        | Residue pair composition of G and D pair that are separated by 7 residues |
| 33             | G9T        | I        | Residue pair composition of G and T pair that are separated by 9 residues |
| 34             | H0N        | I        | Residue pair composition of H and N pair that are attached each other     |
| 35             | C          | I        | Single amino acid composition of C                                        |
| 36             | P1H        | I        | Residue pair composition of P and H pair that are separated by 1 residue  |
| 37             | G4P        | I        | Residue pair composition of G and P pair that are separated by 4 residues |
| 38             | P2N        | I        | Residue pair composition of P and N pair that are separated by 2 residues |
| 39             | D2D        | I        | Residue pair composition of D and D pair that are separated by 2 residues |
| 40             | N1T        | I        | Residue pair composition of N and T pair that are separated by 1 residue  |

|    |                 |     |                                                                           |
|----|-----------------|-----|---------------------------------------------------------------------------|
| 41 | T6D             | I   | Residue pair composition of T and D pair that are separated by 6 residues |
| 42 | negPWM.12       | III | Negative position weighted matrices value at position 12                  |
| 43 | N0G             | I   | Residue pair composition of N and G pair that are attached each other     |
| 44 | negPWM.11       | III | Negative position weighted matrices value at position 8                   |
| 45 | I4G             | I   | Residue pair composition of I and G pair that are separated by 4 residues |
| 46 | P0G             | I   | Residue pair composition of P and G pair that are attached each other     |
| 47 | G6T             | I   | Residue pair composition of G and T pair that are separated by 6 residues |
| 48 | locAA_10_N      | IV  | Amino acid binary localization encoding for N at position 10              |
| 49 | GearynAuto_11_2 | II  | Geary autocorrelation of the molecular volume factor with d value as 2    |

### Hydroxylysine

| Ranking | Feature       | Category | Note                                                                                       |
|---------|---------------|----------|--------------------------------------------------------------------------------------------|
| 1       | G3E           | I        | Residue pair composition of G and E pair that are separated by 3 residues                  |
| 2       | posPWM.2      | III      | Positive position weighted matrices value at position 2                                    |
| 3       | G0E           | I        | Residue pair composition of G and E pair that are attached each other                      |
| 4       | posPWM.11     | III      | Positive position weighted matrices value at position 11                                   |
| 5       | locAA_5_G     | IV       | Amino acid binary localization encoding for G at position 5                                |
| 6       | G1K           | I        | Residue pair composition of G and E pair that are separated by 1 residue                   |
| 7       | posPWM.3      | III      | Positive position weighted matrices value at position 3                                    |
| 8       | K1E           | I        | Residue pair composition of K and E pair that are separated by 1 residue                   |
| 9       | P3G           | I        | Residue pair composition of P and G pair that are separated by 3 residues                  |
| 10      | posPWM.6      | III      | Positive position weighted matrices value at position 6                                    |
| 11      | locAA_8_G     | IV       | Amino acid binary localization encoding for G at position 8                                |
| 12      | posPWM.8      | III      | Positive position weighted matrices value at position 8                                    |
| 13      | locAA_2_G     | III      | Amino acid binary localization encoding for G at position 2                                |
| 14      | G6E           | I        | Residue pair composition of G and E pair that are separated by 6 residues                  |
| 15      | G4K           | I        | Residue pair composition of G and K pair that are separated by 4 residues                  |
| 16      | E2E           | I        | Residue pair composition of E and E pair that are separated by 2 residue                   |
| 17      | K0G           | I        | Residue pair composition of K and G pair that are attached each other                      |
| 18      | K3G           | I        | Residue pair composition of K and G pair that are separated by 3 residues                  |
| 19      | negPWM.11     | III      | Negative position weighted matrices value at position 11                                   |
| 20      | locAA_11_G    | IV       | Amino acid binary localization encoding for G at position 11                               |
| 21      | locAA_9_E     | IV       | Amino acid binary localization encoding for E at position 9                                |
| 22      | E1G           | I        | Residue pair composition of E and G pair that are separated by 1 residue                   |
| 23      | negPWM.2      | III      | Negative position weighted matrices value at position 2                                    |
| 24      | posPWM.5      | III      | Positive position weighted matrices value at position 5                                    |
| 25      | G8G           | I        | Residue pair composition of G and G pair that are separated by 8 residues                  |
| 26      | negPWM.8      | III      | Negative position weighted matrices value at position 8                                    |
| 27      | GearyAuto_6_1 | II       | Geary autocorrelation of the average volumes of residues with d value as 1                 |
| 28      | posPWM.9      | III      | Positive position weighted matrices value at position 9                                    |
| 29      | NorMBAuto_2_6 | II       | Normalized Moreau-Broto autocorrelation of the average flexibility index with d value as 6 |

|    |               |     |                                                                            |
|----|---------------|-----|----------------------------------------------------------------------------|
| 30 | P1E           | I   | Residue pair composition of P and E pair that are seperated by 1 residue   |
| 31 | P6G           | I   | Residue pair composition of P and G pair that are seperated by 6 residues  |
| 32 | G6D           | I   | Residue pair composition of G and D pair that are seperated by 6 residues  |
| 33 | K4D           | I   | Residue pair composition of K and D pair that are seperated by 4 residues  |
| 34 | P0G           | I   | Residue pair composition of P and G pair that are attached each other      |
| 35 | GearyAuto_2_6 | II  | Geary autocorrelation of the average flexibility index with d value as 6   |
| 36 | P5K           | I   | Residue pair composition of P and K pair that are seperated by 5 residues  |
| 37 | G5G           | I   | Residue pair composition of G and G pair that are seperated by 5 residues  |
| 38 | S             | I   | Single amino acid composition of S                                         |
| 39 | P7D           | I   | Residue pair composition of P and D pair that are seperated by 7 residues  |
| 40 | G2G           | I   | Residue pair composition of G and G pair that are seperated by 2 residues  |
| 41 | P9G           | I   | Residue pair composition of P and G pair that are seperated by 9 residues  |
| 42 | negPWM.3      | III | Negative position weighted matrices value at position 3                    |
| 43 | GearyAuto_6_2 | II  | Geary autocorrelation of the average volumes of residues with d value as 2 |
| 44 | G0L           | I   | Residue pair composition of G and L pair that are attached each other      |

---
