# Supplementary material for: HydPred: a novel method for the identification of protein hydroxylation sites that reveals new insights into human inherited disease
Source: Royal Society of Chemistry journal article supplement (doi:10.1039/c5mb00681c), 2015-11-26
Supplement: c5mb00681c3.pdf [file c5mb00681c3.pdf]

**Table S3.** High confidence loss of hydroxylation sites with their associated disease.

| Pro ID      | AC     | Variation | Site  | Associated disease                                                       | Note |
|-------------|--------|-----------|-------|--------------------------------------------------------------------------|------|
| ABCA4_HUMAN | P78363 | C1490Y    | P1486 | Cone-rod dystrophy 3 (CORD3) [MIM:604116]                                | i    |
| AGAL_HUMAN  | P06280 | C378Y     | P380  | Fabry disease (FD) [MIM:301500]                                          | c    |
| ANDR_HUMAN  | P10275 | R615P     | P612  | Androgen insensitivity syndrome (AIS) [MIM:300068]                       | e    |
| ANDR_HUMAN  | P10275 | L616P     | P612  | Androgen insensitivity syndrome (AIS) [MIM:300068]                       | e    |
| ANDR_HUMAN  | P10275 | R617P     | P612  | Androgen insensitivity syndrome (AIS) [MIM:300068]                       | e    |
| ASM_HUMAN   | P17405 | L225P     | P224  | Niemann-Pick disease B (NPDB) [MIM:607616]                               | b    |
| C1QB_HUMAN  | P02746 | G42D      | P41   | Complement component C1q deficiency (C1QD) [MIM:613652]                  | e    |
| C1QB_HUMAN  | P02746 | G42D      | P38   | Complement component C1q deficiency (C1QD) [MIM:613652]                  | e    |
| CCBE1_HUMAN | Q6UXH8 | G327R     | P323  | Hennekam lymphangiectasia-lymphedema syndrome 1 (HKLLS1) [MIM:235510]    | d    |
| CFAH_HUMAN  | P08603 | C325Y     | P324  | Hemolytic uremic syndrome atypical 1 (AHUS1) [MIM:235400]                | c    |
| CFAH_HUMAN  | P08603 | C1163W    | P1166 | Hemolytic uremic syndrome atypical 1 (AHUS1) [MIM:235400]                | c    |
| CHST6_HUMAN | Q9GZX3 | S131P     | P133  | Macular corneal dystrophy 1 (MCD1) [MIM:217800]                          | i    |
| CHST6_HUMAN | Q9GZX3 | S131P     | P132  | Macular corneal dystrophy 1 (MCD1) [MIM:217800]                          | i    |
| CHSTE_HUMAN | Q8NCH0 | C289S     | P288  | Ehlers-danlos syndrome, musculocontractural type 1 (EDSMC1) [MIM:601776] | c    |
| CO1A1_HUMAN | P02452 | G350R     | P346  | Osteogenesis imperfecta 3 (OI3) [MIM:259420]                             | a    |
| CO1A1_HUMAN | P02452 | G1157D    | P1159 | Osteogenesis imperfecta 1 (OI1) [MIM:166200]                             | a    |
| CO1A1_HUMAN | P02452 | G548A     | P544  | Osteogenesis imperfecta 2 (OI2) [MIM:166210]                             | a    |
| CO1A1_HUMAN | P02452 | G533D     | P529  | Osteogenesis imperfecta 2 (OI2) [MIM:166210]                             | a    |
| CO1A1_HUMAN | P02452 | G560R     | P556  | Osteogenesis imperfecta 2 (OI2) [MIM:166210]                             | a    |
| CO1A1_HUMAN | P02452 | G1187V    | P1183 | Osteogenesis imperfecta 2 (OI2) [MIM:166210]                             | a    |
| CO1A1_HUMAN | P02452 | G1025R    | P1024 | Osteogenesis imperfecta 2 (OI2) [MIM:166210]                             | a    |
| CO1A1_HUMAN | P02452 | G338C     | P343  | Osteogenesis imperfecta 4 (OI4) [MIM:166220]                             | a    |
| CO1A1_HUMAN | P02452 | G581R     | P583  | Osteogenesis imperfecta 2 (OI2) [MIM:166210]                             | a    |
| CO1A1_HUMAN | P02452 | G977D     | P976  | Osteogenesis imperfecta 2 (OI2) [MIM:166210]                             | a    |
| CO1A1_HUMAN | P02452 | G197R     | P196  | Osteogenesis imperfecta 4 (OI4) [MIM:166220]                             | a    |
| CO1A1_HUMAN | P02452 | G287S     | P289  | Osteogenesis imperfecta 1 (OI1) [MIM:166200]                             | a    |
| CO1A1_HUMAN | P02452 | G980V     | P976  | Osteogenesis imperfecta 2 (OI2) [MIM:166210]                             | a    |
| CO1A1_HUMAN | P02452 | G368V     | P373  | Osteogenesis imperfecta 2 (OI2) [MIM:166210]                             | a    |
| CO1A1_HUMAN | P02452 | G257R     | P262  | Osteogenesis imperfecta 4 (OI4) [MIM:166220]                             | a    |
| CO1A1_HUMAN | P02452 | G977D     | P973  | Osteogenesis imperfecta 2 (OI2) [MIM:166210]                             | a    |
| CO1A1_HUMAN | P02452 | G476R     | P475  | Osteogenesis imperfecta 2 (OI2) [MIM:166210]                             | a    |
| CO1A1_HUMAN | P02452 | G1100D    | K1096 | Osteogenesis imperfecta 2 (OI2) [MIM:166210]                             | a    |
| CO1A1_HUMAN | P02452 | G1094S    | K1096 | Osteogenesis imperfecta 2 (OI2) [MIM:166210]                             | a    |
| CO1A1_HUMAN | P02452 | G1091S    | K1096 | Osteogenesis imperfecta 2 (OI2) [MIM:166210]                             | a    |
| CO1A1_HUMAN | P02452 | G266E     | K265  | Osteogenesis imperfecta 1 (OI1) [MIM:166200]                             | a    |
| CO1A1_HUMAN | P02452 | G263R     | K265  | Osteogenesis imperfecta 1 (OI1) [MIM:166200]                             | a    |
| CO1A2_HUMAN | P08123 | G253D     | P255  | Osteogenesis imperfecta 2 (OI2) [MIM:166210]                             | a    |
| CO1A2_HUMAN | P08123 | G1003D    | K1008 | Osteogenesis imperfecta 2 (OI2) [MIM:166210]                             | a    |
| CO1A2_HUMAN | P08123 | G1012S    | K1008 | Osteogenesis imperfecta 3 (OI3) [MIM:259420]                             | a    |
| CO2A1_HUMAN | P02458 | G510D     | P506  | Achondrogenesis 2 (ACG2) [MIM:200610]                                    | a    |
| CO2A1_HUMAN | P02458 | G948D     | P953  | Achondrogenesis 2 (ACG2) [MIM:200610]                                    | a    |
| CO2A1_HUMAN | P02458 | G894E     | P899  | Achondrogenesis 2 (ACG2) [MIM:200610]                                    | a    |
| CO2A1_HUMAN | P02458 | G780R     | P779  | Achondrogenesis 2 (ACG2) [MIM:200610]                                    | a    |
| CO2A1_HUMAN | P02458 | G303D     | K308  | Kniest dysplasia (KD) [MIM:156550]                                       | a    |
| CO2A1_HUMAN | P02458 | G453V     | K452  | Achondrogenesis 2 (ACG2) [MIM:200610]                                    | a    |
| CO2A1_HUMAN | P02458 | G282D     | K287  | Stickler syndrome 1 (STL1) [MIM:108300]                                  | a    |
| CO2A1_HUMAN | P02458 | G453D     | K452  | Achondrogenesis 2 (ACG2) [MIM:200610]                                    | a    |
| CO2A1_HUMAN | P02458 | G453A     | K452  | Stickler syndrome 1 (STL1) [MIM:108300]                                  | a    |
| CO2A1_HUMAN | P02458 | D547V     | K542  | Achondrogenesis 2 (ACG2) [MIM:200610]                                    | a    |
| CO2A1_HUMAN | P02458 | G375R     | K374  | Spondyloepiphyseal dysplasia congenital type (SEDC) [MIM:183900]         | a    |
| CO2A1_HUMAN | P02458 | G447S     | K452  | Spondyloepiphyseal dysplasia congenital type (SEDC) [MIM:183900]         | a    |
| CO3A1_HUMAN | P02461 | G879V     | P875  | Ehlers-Danlos syndrome 4 (EDS4) [MIM:130050]                             | a    |
| CO3A1_HUMAN | P02461 | G660D     | P659  | Ehlers-Danlos syndrome 4 (EDS4) [MIM:130050]                             | a    |
| CO3A1_HUMAN | P02461 | G657E     | P659  | Ehlers-Danlos syndrome 4 (EDS4) [MIM:130050]                             | a    |
| CO3A1_HUMAN | P02461 | G444R     | P443  | Ehlers-Danlos syndrome 4 (EDS4) [MIM:130050]                             | a    |

|             |        |        |       |                                                                                                                    |   |
|-------------|--------|--------|-------|--------------------------------------------------------------------------------------------------------------------|---|
| CO3A1_HUMAN | P02461 | G1098V | K1094 | Ehlers-Danlos syndrome 4 (EDS4) [MIM:130050]                                                                       | a |
| CO3A1_HUMAN | P02461 | G1098D | K1094 | Ehlers-Danlos syndrome 4 (EDS4) [MIM:130050]                                                                       | a |
| CO3A1_HUMAN | P02461 | G1101E | K1106 | Ehlers-Danlos syndrome 4 (EDS4) [MIM:130050]                                                                       | a |
| CO3A1_HUMAN | P02461 | G1104A | K1106 | Ehlers-Danlos syndrome 4 (EDS4) [MIM:130050]                                                                       | a |
| CO3A1_HUMAN | P02461 | G264R  | K263  | Ehlers-Danlos syndrome 4 (EDS4) [MIM:130050]                                                                       | a |
| CO3A1_HUMAN | P02461 | G1089D | K1094 | Ehlers-Danlos syndrome 4 (EDS4) [MIM:130050]                                                                       | a |
| CO3A1_HUMAN | P02461 | G267V  | K263  | Ehlers-Danlos syndrome 4 (EDS4) [MIM:130050]                                                                       | a |
| CO4A3_HUMAN | Q01955 | G532D  | K537  | Alport syndrome, autosomal recessive (APSAR) [MIM:203780]                                                          | a |
| CO4A5_HUMAN | P29400 | G796R  | P795  | Alport syndrome, X-linked (APSX) [MIM:301050]                                                                      | a |
| CO4A5_HUMAN | P29400 | G204V  | P200  | Alport syndrome, X-linked (APSX) [MIM:301050]                                                                      | a |
| CO4A5_HUMAN | P29400 | E633K  | K634  | Alport syndrome, X-linked (APSX) [MIM:301050]                                                                      | a |
| CO4A5_HUMAN | P29400 | G638V  | K634  | Alport syndrome, X-linked (APSX) [MIM:301050]                                                                      | a |
| CO4A5_HUMAN | P29400 | G638S  | K634  | Alport syndrome, X-linked (APSX) [MIM:301050]                                                                      | a |
| CO4A5_HUMAN | P29400 | G635D  | K634  | Alport syndrome, X-linked (APSX) [MIM:301050]                                                                      | a |
| CO4A5_HUMAN | P29400 | G638A  | K634  | Alport syndrome, X-linked (APSX) [MIM:301050]                                                                      | a |
| CO4A5_HUMAN | P29400 | G629D  | K634  | Alport syndrome, X-linked (APSX) [MIM:301050]                                                                      | a |
| CO4A5_HUMAN | P29400 | G230R  | K229  | Alport syndrome, X-linked (APSX) [MIM:301050]                                                                      | a |
| CO4A5_HUMAN | P29400 | G325E  | K330  | Alport syndrome, X-linked (APSX) [MIM:301050]                                                                      | a |
| CO7A1_HUMAN | Q02388 | G2674D | P2673 | Epidermolysis bullosa dystrophica, autosomal recessive (RDEB) [MIM:226600]                                         | a |
| CO7A1_HUMAN | Q02388 | G2671V | P2667 | Epidermolysis bullosa dystrophica, autosomal recessive (RDEB) [MIM:226600]                                         | a |
| CO7A1_HUMAN | Q02388 | G2674R | P2673 | Epidermolysis bullosa dystrophica, autosomal recessive (RDEB) [MIM:226600]                                         | a |
| CO7A1_HUMAN | Q02388 | G2623C | K2625 | Epidermolysis bullosa dystrophica, pretibial type (PR-DEB) [MIM:131850]                                            | a |
| COBA2_HUMAN | P13942 | G808E  | K810  | Deafness, autosomal dominant, 13 (DFNA13) [MIM:601868]                                                             | a |
| COLQ_HUMAN  | Q9Y215 | C444Y  | P450  | Myasthenic syndrome, congenital, Engel type (CMSE) [MIM:603034]                                                    | b |
| CRUM1_HUMAN | P82279 | C195F  | P194  | Retinitis pigmentosa 12 (RP12) [MIM:600105]                                                                        | i |
| CXA1_HUMAN  | P17302 | H194P  | P193  | Oculodentodigital dysplasia (ODDD) [MIM:164200]                                                                    | i |
| CXA1_HUMAN  | P17302 | H194P  | P191  | Oculodentodigital dysplasia (ODDD) [MIM:164200]                                                                    | i |
| CXB1_HUMAN  | P08034 | C173R  | P172  | Charcot-marie-tooth disease, x-linked dominant, 1 (CMTX1) [MIM:302800]                                             | b |
| DCR1C_HUMAN | Q96SD1 | H35D   | K40   | Omenn syndrome (OS) [MIM:603554]                                                                                   | d |
| F13B_HUMAN  | P05160 | C450F  | P453  | Factor XIII subunit B deficiency (FA13BD) [MIM:613235]                                                             | c |
| FA7_HUMAN   | P08709 | S120P  | P114  | Factor VII deficiency (FA7D) [MIM:227500]                                                                          | c |
| FBN1_HUMAN  | P35555 | C1733Y | P1732 | Geleophysic dysplasia 2 (GPHYSD2) [MIM:614185]                                                                     | a |
| FBN1_HUMAN  | P35555 | C1577G | P1573 | Stiff skin syndrome (SSKS) [MIM:184900]                                                                            | a |
| FBN1_HUMAN  | P35555 | R1137P | P1142 | Marfan syndrome (MFS) [MIM:154700]                                                                                 | i |
| FBN1_HUMAN  | P35555 | C890R  | P886  | Marfan syndrome (MFS) [MIM:154700]                                                                                 | i |
| FKRP_HUMAN  | Q9H9S5 | C318Y  | P316  | Muscular dystrophy-dystroglycanopathy congenital with brain and eye anomalies A5 (MDDGA5) [MIM:613153]             | i |
| GRM6_HUMAN  | O15303 | C522Y  | P521  | Night blindness, congenital stationary, 1B (CSNB1B) [MIM:257270]                                                   | i |
| HEMH_HUMAN  | P22830 | C406S  | P404  | Erythropoietic protoporphyria (EPP) [MIM:177000]                                                                   | c |
| HEMH_HUMAN  | P22830 | C406Y  | P404  | Erythropoietic protoporphyria (EPP) [MIM:177000]                                                                   | c |
| IDS_HUMAN   | P22304 | H159P  | K164  | Mucopolysaccharidosis 2 (MPS2) [MIM:309900]                                                                        | h |
| KCNH2_HUMAN | Q12809 | T65P   | P63   | Long QT syndrome 2 (LQT2) [MIM:613688]                                                                             | c |
| MIS_HUMAN   | P03971 | C525Y  | P524  | Persistent Muellerian duct syndrome 1 (PMDS1) [MIM:261550]                                                         | g |
| MIS_HUMAN   | P03971 | C525Y  | P523  | Persistent Muellerian duct syndrome 1 (PMDS1) [MIM:261550]                                                         | g |
| NDP_HUMAN   | Q00604 | S92P   | P98   | Norrie disease (ND) [MIM:310600]                                                                                   | i |
| NDP_HUMAN   | Q00604 | R97P   | P98   | Norrie disease (ND) [MIM:310600]                                                                                   | i |
| NDP_HUMAN   | Q00604 | C96W   | P98   | Norrie disease (ND) [MIM:310600]                                                                                   | i |
| NMDE1_HUMAN | Q12879 | C436R  | P435  | Epilepsy, focal, with speech disorder and with or without mental retardation (FESD) [MIM:245570]                   | b |
| NOTC3_HUMAN | Q9UM47 | C123F  | P122  | Cerebral arteriopathy with subcortical infarcts and leukoencephalopathy, autosomal dominant (CADASIL) [MIM:125310] | c |
| NOTC3_HUMAN | Q9UM47 | C201Y  | P197  | Cerebral arteriopathy with subcortical infarcts and leukoencephalopathy, autosomal dominant (CADASIL) [MIM:125310] | c |
| NOTC3_HUMAN | Q9UM47 | C123Y  | P122  | Cerebral arteriopathy with subcortical infarcts and leukoencephalopathy, autosomal dominant (CADASIL)              | c |

|             |        |       |      |                                                                       |   |
|-------------|--------|-------|------|-----------------------------------------------------------------------|---|
|             |        |       |      | [MIM:125310]                                                          |   |
| NPC2_HUMAN  | P61916 | C47F  | P46  | Niemann-Pick disease C2 (NPC2) [MIM:607625]                           | b |
| PERT_HUMAN  | P07202 | C808R | P806 | Thyroid dyshormonogenesis 2A (TDH2A) [MIM:274500]                     | e |
| PKD1_HUMAN  | P98161 | L727P | P733 | Polycystic kidney disease 1 (PKD1) [MIM:173900]                       | e |
| PRKN2_HUMAN | O60260 | C418R | P417 | Parkinson disease 2 (PARK2) [MIM:600116]                              | b |
| SCN5A_HUMAN | Q14524 | H681P | P685 | Brugada syndrome 1 (BRGDA1) [MIM:601144]                              | c |
| SCN5A_HUMAN | Q14524 | H681P | P684 | Brugada syndrome 1 (BRGDA1) [MIM:601144]                              | c |
| STS_HUMAN   | P08842 | Q560P | P564 | Ichthyosis, X-linked (IXL) [MIM:308100]                               | e |
| THAP1_HUMAN | Q9NVV9 | Q187K | K190 | Dystonia 6,torsion (DYT6) [MIM:602629]                                | a |
| TNR11_HUMAN | Q9Y6Q6 | C175R | P171 | Osteopetrosis, autosomal recessive 7 (OPTB7) [MIM:612301]             | a |
| TSC2_HUMAN  | P49815 | R261P | P255 | Tuberous sclerosis 2 (TSC2) [MIM:613254]                              | h |
| UROM_HUMAN  | P07911 | C223Y | P219 | Familial juvenile hyperuricemic nephropathy 1 (HNFJ1)<br>[MIM:162000] | c |
| UROM_HUMAN  | P07911 | C217R | P219 | Familial juvenile hyperuricemic nephropathy 1 (HNFJ1)<br>[MIM:162000] | c |

Note: a. Dysplasia of skeleton, joint, muscle or skin; b. Malfunction of neurologic system; c. Abnormalities of cardiovascular, cerebrovascular, arteries or blood; d. Immunodeficiency; e. Kidney disease; f. Malfunction of endocrine system; g. Abnormalities of reproductive system; h. Multisystem disorder; i. Dysplasia of eyes or areas. There are 111 different disease-associated variations in all in this table that were predicted to cause 117 different high-confidence loss of hydroxylation sites.
